# Supplementary material for: Single-inspiratory quantitative CT nomogram for enhanced PRISm and COPD differentiation: a cross-sectional study with interpretable diagnostic boundaries
Source: PeerJ. 2026 Jan 14;14:e20575. doi: 10.7717/peerj.20575 (PMC12811969; doi:10.7717/peerj.20575)
Supplement: Supplemental Information 2 [file peerj-14-20575-s002.xlsx]

## Sheet: raw
Code	Sex	Age	Height	Weight	BMI	Smoking	FVC	FEV1%	FEV1	FEV1/FVC%	PEF	MEF75	MEF50	MEF25	DLCOSB	DLCOSB (%)	RV (L)	TLC (L)	Lung volume (CC)	LAA (CC)	EI (%)	MLD (HU)	PI-1 (HU)	PI-15 (HU)	AWT-Pi10	TBV (cc)	AVD9 (mm)	AVD15 (mm)	AVD21 (mm)	CSA9 (mm2)	CSA15 (mm2)	CSA21 (mm2)	SLAA9 (mm2)	SLAA15 (mm2)	SLAA21 (mm2)	Ntotal9 (ea)	Ntotal15 (ea)	Ntotal21 (ea)	NCSA9 (ea)	NCSA15 (ea)	NCSA21 (ea)
1	F	74	1.6	70	27.3438	0	2.28	109	2.08	0.912281	4.48	4.3	3.33	1.72	4.45	65	42.98	3.94	2419.91	0.64	0.03	-723.59	-903	-851	4.63	182.2	2.53	2.92	3.21	5308.7	2703.05	941.09	6889.21	3273.66	1103.78	981	415	135	579	193	63
2	M	54	1.73	90	30.0712	0	3.17	79.5	2.74	0.864353	7.54	7.54	4.16	1.26	9.56	98	47.2	5.98	2677.03	0.87	0.03	-698.45	-896	-833	5.45	201.73	2.99	3.79	3.63	9940.37	4196.15	1651.08	5215.83	1690.3	942.54	783	269	103	340	67	31
3	F	67	1.65	52.5	19.2837	0	2.2	80	1.83	0.831818	3.65	3.65	2.65	0.83	5.24	69	64.83	4	4175.58	124.81	2.99	-843.75	-962	-924	3.37	173.08	2.72	3.32	3.66	4073.9	5141.36	2983.25	27702.2	17653.4	10571.2	623	523	306	324	151	79
4	F	44	1.58	55	22.0317	0	2.65	95.8	2.46	0.928302	4.17	4.17	3.66	1.58	8.17	101.1	38.31	3.5	3649.7	40.0892	1.09843	-816.93	-951	-909	3.67904	232.647	2.34937	2.87705	3.11787	5684.99	3902.93	2303.05	25277.7	15552.7	8262.52	1385	661	327	921	294	134
5	M	66	1.62	50	19.052	1	2.08	48.4	1.27	0.610577	2.65	1.77	0.65	0.28	2.89	37.3	56.25	4.55	4443.26	384.63	8.66	-850.48	-990	-937	4.53	246.67	2.19	2.64	2.9	5826.47	4570.63	2286.38	47535.6	31596.4	16784.6	1567	834	407	1153	445	192
6	M	67	1.73	68	22.7204	1	2.85	70.4	2.13	0.747368	6.28	5.37	2.1	0.49	8.24	93.8	64.83	5.41	3480.71	3.3	0.09	-781.3	-922	-879	4.43	155.67	3.06	3.36	3.63	5264.72	4843.59	2947.79	5331.46	3077.72	1878.3	578	508	315	245	160	79
7	F	66	1.57	62	25.1532	0	1.67	75	1.51	0.904192	5.67	5.62	3.03	0.55	4.13	59	52.88	3.55	1761.4	30.21	1.72	-657.99	-974	-833	5.51	176.52	2.72	3.04	3.12	4890.27	2608.27	671.06	1108.08	434.43	66.42	908	367	99	501	175	43
8	F	46	1.58	59	23.634	0	2.68	91	2.31	0.86194	7.1	7.1	4.1	1.19	6.32	78.7	43.28	4.75	4289.77	104.76	2.44208	-829.75	-964	-917	2.94897	132.139	1.72718	2.33855	2.8459	2327.85	2969.79	1998.31	40603.2	28123.5	16457.8	714	540	288	597	346	126
9	F	68	1.6	64	25	0	1.54	70.4	1.49	0.967532	4.45	4.45	2.54	1.02	5.25	73	55.61	3.92	2394.54	3.13	0.13	-719.16	-913	-840	5.68	173.23	2.71	3.03	3.12	6229.4	3307.91	1234.13	5217.79	1788.34	494	838	383	116	464	163	56
10	F	75	1.5	47	20.8889	0	2.01	114	1.71	0.850746	2.59	2.59	2.32	0.99	5.62	94.4	62.31	4.34	2669.67	11.7093	0.438605	-757.857	-937	-887	4.65693	191.12	2.55737	2.99765	3.02734	4746.14	3359.32	1494.94	12028.9	6609.83	3055.99	954	459	205	558	196	91
11	F	65	1.59	75	29.6665	0	2.01	76.7	1.58	0.78607	4.61	4.61	1.92	0.42	6.51	91.7	46.24	3.86	2522.22	1.68	0.07	-738.09	-913	-851	5.59	220.8	2.71	3.02	2.98	8351.68	4461.9	2225.22	7907.43	4002.48	1393.66	1134	521	202	593	242	103
12	F	52	1.53	55	23.4952	0	1.31	56.8	1.19	0.908397	2.52	2.27	1.29	0.44	2.19	30.8	50.39	2.67	2048.92	2.5	0.12	-740.55	-917	-849	6.09	145.53	2.33	2.66	2.8	2990.12	1910.4	951.4	4829.18	1909.56	694.89	918	437	189	623	222	98
13	M	64	1.62	55	20.9572	0	2.28	66.5	1.89	0.828947	3.98	3.88	2.32	0.69	5.82	69.9	57.62	4.9	3877.43	12.98	0.33	-813.93	-937	-898	4.58	147.19	2.83	3.18	3.59	3131.2	3449.11	2647.86	9128.43	5507.44	3496.96	439	451	314	216	163	83
14	M	60	1.72	53	17.9151	1	2.97	75	2.44	0.821549	7.02	6.88	3.18	0.78	5.35	57	25.5	3.72	5276.42	170	3.22	-833	-992	-913	2.95	281.4	2.16	2.51	2.82	5473.29	4052.93	2990.05	36743.1	25327.7	16374.1	1718	1036	608	1266	575	301
15	F	65	1.65	70	24.2215	0	2.22	110.5	1.99	0.896396	4.84	4.45	3.15	1.25	5.19	79.1	45	3.98	2606.1	12.079	0.463489	-770.128	-938	-887	4.90782	220.325	2.55898	2.9855	3.03252	6230.98	4051.03	1738.49	13346.6	7536.84	3330.1	1181	576	248	705	263	123
16	M	72	1.67	57	20.4382	0	3.42	88.1	2.34	0.684211	4.89	4.74	1.96	0.54	5.17	65.4	44.26	5.36	4321.06	338.97	7.84	-853.95	-980	-936	3.58	211.93	2.25	2.71	2.96	4684.05	3718.31	2061.33	47285.1	31934.6	16964.7	1177	669	354	791	327	142
17	M	64	1.75	60	19.5918	1	3.15	67.4	2.18	0.692063	6.23	3.94	1.68	0.54	9.38	100.7	67.41	6.41	5183.44	75.29	1.45	-815.86	-955	-909	4.09	343.56	2.3	2.72	2.84	7762.73	6423.55	3901.81	49246.2	26501	14789.9	1798	1077	593	1204	565	292
18	M	77	1.72	56	18.9292	0	2.1	41.6	1.15	0.547619	2.27	1.37	0.64	0.32	2.72	33.2	65.83	5.37	4493.56	683.84	15.22	-846.34	-1006	-950	3.86	346.94	2.46	2.74	2.9	7015.25	5555.04	3382.49	54203.5	39173.4	21925.3	1683	1066	548	1027	542	275
19	M	73	1.6	46.5	18.1641	0	2	41.9	0.97	0.485	2.22	1.09	0.4	0.19	2.8	40	66	4.25	4693.95	1480.71	31.55	-886.86	-1014	-975	3.75	195.41	2.03	2.56	2.75	3206.46	3395.67	1760.45	75697.1	53064.1	30725.5	1088	712	374	858	394	191
20	F	70	1.55	55	22.8928	0	1.99	73.3	1.42	0.713568	3.72	2.46	1.06	0.19	4.44	64.8	51.37	3.65	2404.56	5.43	0.23	-757.91	-928	-867	5.54	117.58	2.26	2.75	2.93	3352.37	1970.34	1003.48	7992.32	3371.34	1427.08	729	347	147	511	175	71
21	F	80	1.5	48.5	21.5556	0	1.41	71.9	1.02	0.723404	2.38	2.38	0.86	0.17	3.46	59.8	62.47	3.25	2986.45	86.24	2.89	-775.42	-974	-899	5.57	113.65	2.62	3.03	3.03	3540.05	2632.39	1288.95	17859.2	10667.7	4588.45	490	327	169	294	135	68
22	M	85	1.68	53	18.7783	0	1.87	60.6	1.41	0.754011	3.45	2.45	1.24	0.56	4.45	62.2	72.55	4.23	3446.68	51.94	1.51	-817.53	-955	-911	5.58	138.47	2.89	3.3	3.55	3134.6	3314.48	2327.93	14330.2	9224.62	5147.27	529	454	282	280	135	87
23	M	77	1.7	60	20.7612	1	3.1	80.9	2.14	0.690323	3.54	3.4	1.86	0.5	5.52	69.9	63.12	5.17	5492.68	269.92	4.91	-848.79	-970	-930	3.52	291.27	2.26	2.71	2.89	8341.46	7099.97	4084.37	52029.5	36159.8	20500.5	1746	1032	519	1214	546	255
24	F	76	1.5	42.5	18.8889	0	1.55	71.1	1.05	0.677419	2.94	1.73	0.77	0.26	3.23	54.7	66.85	3.35	2006.04	0.15	0.01	-738.76	-900	-851	5.88	109.84	3.03	3.34	3.68	2996.31	2177.34	1129.83	2072.3	1243.52	420.23	561	375	173	257	119	54
25	M	52	1.77	75	23.9395	1	3.21	68.6	2.5	0.778816	6.08	3.86	2.36	1.07	7.98	77.7	51.38	5.91	6189.38	618.29	9.99	-862.09	-985	-941	4.02	262.37	2.47	3.04	3.21	5926.45	6635.2	4965.56	52707.6	40019.2	31159.6	1133	911	657	719	385	263
26	M	51	1.7	61	21.1073	1	2.64	60.4	2.07	0.784091	5.08	3.84	2.09	0.72	5.52	57	44.12	4.44	3869.16	229.6	5.93	-838.41	-979	-929	4.25	262.94	2.41	2.67	2.73	5838.73	3792.81	2681.2	36904.8	24744.7	13377	1387	753	423	853	415	241
27	M	78	1.56	53	53	0	2.47	82	1.96	0.793522	4.99	4.44	2.25	0.66	5.32	73	40.59	3.65	3149.31	1.62	0.05	-760.43	-902	-857	5.59	147.76	3.1	3.4	3.74	5546.25	5232.48	3405.91	3001.05	1735.22	942.64	498	465	284	208	146	56
28	M	69	1.7	62	21.4533	1	2.68	79.2	2.3	0.858209	5.63	5.27	3.04	1.07	6.45	75.9	54.35	4.89	4232.73	91.58	2.16	-809.57	-962	-908	3.79	259.91	2.37	2.81	3.04	5516.29	4844.7	2741.88	27244.8	16594.3	8330.59	1281	859	413	840	435	179
29	F	58	1.63	56	21.0772	0	2.05	61.4	1.47	0.717073	3.33	3.11	1.38	0.45	6.07	78.2	54.84	5.09	4069.32	229.76	5.65	-812.82	-975	-925	4.51	283.43	2.65	2.89	3.16	5287.31	3866.16	2437.93	29918.2	19950.3	10946.9	1156	746	391	660	365	168
30	M	66	1.65	50	18.3655	1	1.86	54.7	1.46	0.784946	2.84	2.84	1.85	0.52	4.19	53.4	59.12	3.06	1837.95	21.85	1.19	-699.57	-955	-847	5.83	165.45	2.49	2.95	3.17	4759.43	2468.39	740.78	5306.45	1956.08	356.31	909	355	76	568	194	37
31	M	69	1.66	56	20.3223	1	2.84	65.3	1.81	0.637324	4.01	2.96	0.92	0.43	5.79	70.9	60.14	5.57	4545.8	74.49	1.64	-811.55	-972	-894	4.83	294.27	2.21	2.47	2.7	6255.27	4472.74	3092.07	27101.2	17321.7	9487.53	1782	1005	532	1238	595	292
32	F	79	1.56	40.5	16.642	0	1.67	60.3	0.89	0.532934	1.83	1	0.51	0.21	2.49	42.1	66.85	3.67	3918.47	316.36	8.07	-857.77	-978	-937	5.22	125.6	2.92	3.08	3.5	2804.38	3391.66	2598.42	34951.4	21349.1	13072.4	409	444	340	193	164	81
33	M	63	1.68	52	18.424	0	3.07	77.7	2.34	0.762215	3.8	3.8	2.8	0.75	5.56	63.8	47.56	4.87	2450.73	1.18	0.05	-696.13	-884	-823	5.05	166.07	3.19	3.72	3.83	5774.8	4100.45	2554.64	1811.56	1464.56	739.74	668	444	224	253	101	64
34	M	79	1.71	47	16.0733	1	2.41	64	1.51	0.626556	2.37	2.09	1.09	0.38	3.55	50	59.75	4.8	4699.86	204.4	4.35	-840.03	-972	-925	4.35	189.3	2.07	2.54	2.81	3572.52	3558.23	2017.87	44326.7	30071.7	16336.9	1063	737	406	801	431	194
35	F	91	1.53	47	20.0777	0	0.93	79	0.76	0.817204	1.15	1.15	0.88	0.43	2.95	60.2	74.62	3.14	1551.7	6.2	0.4	-740.93	-935	-872	5.33	104.57	2.39	2.82	2.77	2259.66	1113.86	250.7	5250.48	1378.42	229.69	575	246	43	381	123	24
36	F	91	1.56	45.5	18.6966	0	0.91	64.2	0.69	0.758242	1.36	1.17	0.63	0.27	4.88	95.3	70.54	3.19	2961.8	120.7	4.08	-797.11	-981	-915	5.69	163.4	2.68	3.09	3.06	5314.94	3151.58	1493.23	22078.5	11513.5	4669.56	765	400	173	432	177	76
37	M	55	1.72	75	25.3515	0	2.82	70.7	2.38	0.843972	4.51	4.51	3.46	1.15	6.47	67.5	42.15	4.69	2701.67	224.83	8.32	-768.81	-1024	-917	4.67	199.63	2.85	3.19	3.38	7725.16	3507.67	1317.11	9291.7	4392.02	1641.58	912	372	140	477	142	54
38	M	63	1.75	82	26.7755	1	3.28	74.8	2.48	0.756098	5.82	5.04	2.49	0.76	6.74	71	35.55	5.93	4737.34	36.07	0.76	-812.23	-947	-908	4.62	207.4	2.95	3.58	3.88	6544.01	7339.04	5409.55	19259.9	14795.9	10194.6	675	621	441	262	157	83
39	M	91	1.7	53	18.3391	0	1.51	49	1.04	0.688742	2.98	1.61	0.88	0.28	2.45	36	68.65	3.61	3305.96	228.17	6.9	-823.39	-986	-929	5.23	186.6	3.04	3.21	3.57	6827.87	5518.47	3004.35	24580	20631.6	8325.95	585	510	211	279	214	78
40	F	85	1.55	55	22.8928	0	1.02	55	0.76	0.745098	1.55	1.55	0.93	0.19	5.27	70.66	55.81	2	2495.56	1.18	0.05	-729.26	-889	-835	5.75	141.67	3.19	3.73	3.8	4801.05	4020.89	1966.13	1994.35	1058.97	405.4	623	416	183	232	110	48
41	M	44	1.76	85	27.4406	0	3.45	75.9	2.95	0.855072	6.4	6.4	3.72	1.28	8.77	81.1	35.31	4.82	4766.9	14.07	0.3	-839.34	-940	-910	3.37	266.11	2.25	2.89	3	9187.33	7008.75	4754.44	56887.7	31446.8	17988.9	1567	799	448	1111	349	185
42	M	80	1.72	60	20.2812	0	2.64	72	1.83	0.693182	2.49	2.38	1.65	0.75	5.75	75	72.76	5.9	4888.76	21.61	0.44	-799.82	-940	-890	4.48	143.92	2.97	3.48	3.72	3871.27	4906.41	4043.46	10179	6051.83	3538.99	353	395	308	165	116	59
43	F	40	1.69	53	18.5568	0	2.99	70	2.19	0.732441	2.89	2.84	1.99	1.13	6.78	73.5	45.3	4.75	5170.8	578.37	11.19	-881.76	-978	-945	3.14	207.31	1.99	2.41	2.75	3650.2	3720.71	2239.04	63943	46135.6	27373.3	1364	902	466	1109	572	222
44	F	62	1.63	58	21.83	0	2.42	79.2	1.89	0.780992	4.83	3.92	1.8	0.74	4.93	63.6	46.33	4.27	4642.12	96.19	2.07	-837.53	-957	-923	3.05	148.65	2.69	4.1	3.37	763.3	3823.33	1022.68	25328.8	15309	13764.1	35	86	401	9	18	7
45	M	74	1.66	69	25.0399	1	2.42	62.9	1.63	0.673554	4.9	2.95	1.5	0.27	6.53	84.6	52.9	5.07	4451.72	217.7	4.89	-847.76	-974	-929	4.15	225.57	2.23	2.65	2.8	4946.74	4305.91	2296.08	44444.3	28530.7	14804.5	1296	807	407	941	438	205
46	F	74	1.54	67	28.251	0	1.61	68.2	1.15	0.714286	2.78	2.44	0.93	0.25	5.21	82.3	55.32	3.52	4092.74	357.7	8.74	-864.35	-978	-940	4.25	207.05	2.19	2.68	2.94	4868.5	4080.95	2382.07	46833.4	30778.3	15280.6	1236	734	406	908	377	183
47	F	77	1.55	51	21.2279	0	1.29	45	0.75	0.581395	1.21	1	0.42	0.2	7.33	83.4	61	3.38	4628.12	1017.51	21.99	-856.79	-1024	-967	4.25	245.81	2.37	2.91	3.16	8920.71	7187.03	4649.15	43354.7	29080.5	16222.1	1325	760	468	896	354	199
48	M	68	1.6	48	18.75	0	2.43	72	1.77	0.728395	5.05	3.79	1.49	0.48	6.88	93.6	62.99	4.71	4431.54	55.27	1.25	-775.37	-954	-880	4.27	250.85	2.17	2.53	2.84	4172.86	3170.28	2030.88	17108.8	9390.87	4480.14	1473	923	463	1046	510	220
49	M	87	1.8	63	19.4444	0	2.46	70.2	1.77	0.719512	2.87	2.68	1.74	0.48	3.86	50.2	44.03	4.18	4600.11	13.24	0.29	-801.95	-935	-895	4.93	169.44	3.35	3.76	3.84	6718.06	8385.5	6190.49	5414.25	3256.37	2057.34	359	392	294	121	78	59
50	F	88	1.6	52.5	20.5078	0	1.35	63.1	0.99	0.733333	2.66	2.07	0.93	0.24	2.03	33	44.26	1.9	2192.05	2.18	0.1	-765.56	-923	-869	5.51	98.51	3.08	3.43	3.64	3655.04	2289.55	1140.24	3873.15	2011.51	797.2	458	289	148	189	89	43
51	F	61	1.57	51	20.6905	0	1.72	77.7	1.62	0.94186	5.26	3.78	2.24	1.03	3.67	51.5	37.99	2.6	2257.08	105.57	4.68	-766.01	-1021	-896	4.89	163.44	2.44	2.66	2.79	3648.7	1919.1	849.86	4225.44	1969.9	767.15	1013	440	179	634	242	88
52	M	40	1.74	75	24.7721	1	4.02	93.1	3.62	0.900498	6.68	6.15	4.67	2.49	10.06	93.2	40.96	6.28	5672.81	66.2122	1.16718	-841.559	-951	-921	2.87757	219.182	3.04406	3.5309	3.75992	8336.12	10378	7293.54	27572.8	20102.3	12247.6	620	644	410	239	131	74
53	M	69	1.6	55	21.4844	1	1.78	63	1.54	0.865169	3.33	3.33	2.37	0.52	1.58	21	49	2.93	1664.68	0.16	0.01	-631.13	-881	-811	6.16	185.19	2.41	2.6	2.72	4124.75	1849.55	278.66	3118.71	1061	119.59	1071	342	54	709	217	32
54	M	70	1.7	60	20.7612	1	2.44	75.2	2.14	0.877049	3.41	3.41	2.29	1.35	4.38	52.3	68.88	4.75	4309.78	398.56	9.25	-849.23	-997	-936	3.76	211.82	2.04	2.53	2.77	4633.58	4145.54	2240.48	43988.7	31082.2	17510.2	1284	811	434	998	482	211
55	F	68	1.56	60	24.6548	0	2.1	99.3	1.94	0.92381	4.26	4.26	3.4	1.41	6.2	90.3	51.66	3.44	2653.89	0.779832	0.029384	-755.451	-914	-869	4.89629	127.034	3.04013	3.32227	3.53653	4785.81	3897.33	1637.57	4324.08	2180.03	879.985	608	453	198	282	143	58
56	M	60	1.7	68	23.5294	1	3.09	83.4	2.64	0.854369	6.32	6.16	3.84	1.29	8.24	90.6	55.26	5.52	5588.98	27.6024	0.493872	-801.176	-922	-884	5.35642	53.3695	4.70838	4.41494	4.27134	1079.16	2014.2	1771.01	9995.94	9523.29	5568.48	41	91	76	8	8	12
57	M	81	1.74	55	18.1662	0	2.18	61	1.63	0.747706	3.71	3.64	1.53	0.49	5.81	72.6	63.28	4.92	3144.49	46.13	1.47	-772.17	-956	-893	5.47	232.93	2.54	2.82	2.9	5946.11	4380.09	2268.01	18286.1	12063.6	5293.28	1132	622	318	668	318	166
58	M	72	1.7	68	23.5294	0	3.61	73.9	2.06	0.570637	5.09	2.55	1.18	0.44	5.19	63	30.12	3.39	5966.03	1231.4	20.64	-887.76	-985	-955	3.63	239.74	2.06	2.51	2.86	5593.45	5182.62	3641.55	78596.1	60596.5	36256.9	1398	924	554	1100	539	261
59	M	78	1.65	75	27.5482	1	1.77	55.9	1.38	0.779661	2.83	2.68	1.16	0.36	5.7	76.4	50.4	4.87	5058.99	311.03	6.15	-855.72	-973	-933	4.06	243.36	2.26	2.58	2.73	6402.79	5554.59	3145.17	54685.3	36827.2	20178.6	1445	871	463	1033	479	246
60	F	81	1.5	55	24.4444	1	1.22	55	0.76	0.622951	1.73	1.14	0.48	0.12	5.77	101.1	63.09	3.77	2962.12	37.61	1.27	-815.66	-953	-905	6.18	165.77	2.3	2.76	2.98	4468.18	3007.8	1739.52	21468.7	11698	5067.08	938	511	222	630	248	100
61	M	77	1.7	65	22.4913	0	2.17	65.2	1.71	0.788018	5.71	4.9	1.89	0.53	6.38	81.3	59.85	5.32	5482.05	120.55	2.2	-824.66	-961	-909	3.98	96.65	2.69	2.93	3.11	1274.19	2429.47	2370.1	21477.1	16868.4	13555	197	296	286	116	123	96
62	M	81	1.68	55	19.487	0	1.77	49.7	1.13	0.638418	3.29	1.83	0.75	0.28	6.66	95.5	67.08	4.31	4284.55	110.41	2.58	-835.83	-959	-924	4.74	165.29	3.03	3.35	3.77	4313.7	4259.12	3823.9	25540.8	19337.6	12790.3	525	477	392	238	155	92
63	F	52	1.6	40	15.625	0	2.28	83.5	2.08	0.912281	4.94	4.9	3.67	1.56	5.56	70	73.73	4.06	3487.95	67.2569	1.92826	-834.192	-958	-918	3.07928	191.065	2.0722	2.64244	2.84761	3758.33	2950.41	1513.38	29273.8	18332.4	9827.61	1290	677	318	1003	373	141
64	M	73	1.6	64	25	0	3.02	93.8	2.1	0.695364	4.13	3.55	1.87	0.55	6.26	91.5	48.1	5.81	3619.36	61.38	1.7	-799.64	-957	-907	4.02	147.47	3.19	3.52	3.52	5240.97	4608.47	2981.05	14217	10544.3	6306.7	488	418	294	181	126	86
65	M	71	1.75	90	29.3878	0	2.88	80.5	2.44	0.847222	4.31	3.93	3.05	1.21	7.71	87.1	52.29	6.16	3966.39	205.194	5.17332	-731.096	-1020	-898	5.47902	364.279	3.06807	3.32642	3.17243	15969.2	10726.6	5271.64	9666.38	5616.83	2499.4	1408	749	435	609	295	204
66	M	76	1.65	65	23.8751	0	2.41	76.4	1.92	0.79668	6.15	5.77	2.48	0.35	7.2	95.4	46.51	4.88	3341.6	10.35	0.31	-753.88	-927	-867	5.52	250.68	2.56	2.98	3.2	7286.28	4827.9	2297.47	13108.1	7800.51	3419.41	1255	629	301	743	294	131
67	M	75	1.73	65	21.7181	0	2.52	63.6	1.69	0.670635	3.77	2.86	1.24	0.36	5.67	71.6	61.97	4.88	4342.25	326.8	7.53	-852.7	-979	-935	5.18	201.85	2.13	2.64	2.86	4303.63	3562.75	2220.39	45568.3	28924.5	14997.3	1093	673	383	792	356	179
68	F	72	1.54	54.5	22.9803	0	1.61	72	1.25	0.776398	3.03	2.7	1.35	0.4	4.18	65.1	58.27	4.07	2542.5	14.84	0.58	-779.25	-941	-890	5.06	179.91	2.45	2.79	3.14	5065.49	2690.67	1330.66	14032.2	7052.81	2541.95	1013	466	187	650	235	89
69	M	80	1.65	52	19.1001	0	1.06	29	0.63	0.59434	1.53	0.61	0.37	0.21	3.1	47	67.69	4.5	4143.9	102.83	2.48	-814.73	-962	-915	5.24	233.64	2.3	2.85	3.06	5540.99	5082.87	2441.79	34506.9	22558.8	10921.2	1087	670	296	721	310	129
70	M	78	1.7	62.5	21.6263	0	1.85	52.1	1.26	0.681081	2.28	2.02	0.88	0.25	2.7	37	70.48	4	4164.23	8.05	0.19	-772.79	-926	-873	6.14	190.94	3.2	3.62	3.83	6056.12	7228.63	5045.49	5126.84	3163.84	1843.36	535	512	367	204	134	82
71	F	72	1.63	60	22.5827	0	1.44	33.5	0.69	0.479167	1.61	0.59	0.35	0.2	3.4	48	64.32	3.48	4855.53	806.8	16.62	-859.79	-986	-951	4.95	289.01	2.47	2.7	2.85	7345.53	4774.34	3060.37	57770.2	39393.6	22317.2	1344	839	481	852	442	234
72	M	63	1.75	68	22.2041	1	2.98	50.9	1.69	0.567114	4.1	1.94	0.68	0.14	7.89	83.1	64.77	5.9	5849.75	20.45	0.35	-809.07	-940	-904	4.45	56.35	4.24	4.22	4.93	589.81	1226.63	1383.66	12611.8	14813.8	8545.52	33	78	63	7	13	10
73	M	57	1.7	76	26.2976	1	2.66	75.5	2.44	0.917293	6.64	5.66	2.9	1.56	5.97	64.7	40.85	3.99	3662.39	708.21	19.34	-841.17	-1024	-963	3.84	189.82	2.27	2.83	2.96	5793.58	4015.68	2076.5	29942.6	17244.6	9697.93	1154	576	288	819	269	118
74	F	76	1.53	48	20.5049	0	1.32	72.3	1.17	0.886364	3.9	3.54	1.63	0.68	2.12	34.2	62.09	2.9	3544.45	37.94	1.07	-835.86	-950	-910	3.37	209.97	2.37	2.73	2.9	5038.68	3352.75	2133.2	27292.5	17003.5	8989.68	1209	613	330	763	298	151
75	F	55	1.6	65	25.3906	0	2.63	57.5	1.38	0.524715	2.8	1.54	0.82	0.31	8.32	107.3	56.92	4.92	3325.48	0.09	0	-718.92	-891	-836	5.37	195.71	3.41	3.73	3.99	8123.53	7314.33	4814.42	1578.33	949.35	474.68	720	581	362	200	135	84
76	F	73	1.55	50	20.8117	0	1.44	69	1.19	0.826389	3.55	3.35	1.49	0.43	2.66	41	56.9	3.14	3385.14	123.68	3.65	-815.38	-971	-914	3.81	228.53	2.35	2.61	2.73	5045.31	3596.31	1713.9	28615.4	16091.5	7117.99	1330	709	350	879	397	189
77	M	66	1.7	55	19.0311	0	2.64	51	1.48	0.560606	3.6	1.68	0.78	0.35	4.62	54.5	60.43	5.43	4399.13	752.47	17.11	-816.98	-1019	-955	5.09	225.74	2.48	2.76	2.94	4127.25	3426.77	2159.57	46374.3	27891.5	15203.8	873	627	391	537	322	179
78	M	60	1.74	64	21.1389	1	3.65	93.2	3.01	0.824658	5.93	5.93	3.75	1.14	7.08	76.5	33.5	4.09	5210.8	118.329	2.27084	-836.566	-961	-920	3.36851	250.084	2.46467	3.08214	3.31465	8433.29	8066.03	4919.15	44962.5	28956.7	17392.1	1135	787	437	732	294	144
79	M	89	1.65	65	23.8751	0	1.59	61.2	1.37	0.861635	4.11	4.01	1.97	0.61	6.26	89.9	46.24	4.39	2855.63	15.45	0.54	-767.14	-939	-873	5.74	106.79	3.03	3.38	3.51	4042.28	3308.67	1582.99	7000	2742.38	1093.41	435	348	184	204	111	60
80	M	83	1.59	62	24.5243	0	2.06	78.8	1.68	0.815534	3.79	3.79	2.61	0.84	4.85	73.3	57.62	3.79	3497.5	75.34	2.15	-775.7	-964	-897	3.96	243.3	2.53	2.68	2.78	6780.49	4847.32	2218.09	20805.5	12439.3	4964.94	1245	725	323	773	415	179
81	F	58	1.58	42	16.8242	0	2.32	87.3	1.96	0.844828	2.8	2.71	2.42	0.89	6.3	84.7	57	4.42	2549.62	0.915299	0.035899	-747.147	-911	-860	4.95894	135.876	3.06201	3.59726	3.78232	3960.31	2608.37	1441.17	1047.13	565.109	203.934	643	335	185	257	93	52
82	F	73	1.58	51	20.4294	0	1.64	70.7	1.34	0.817073	3.71	2.64	1.39	0.63	5.18	76.7	62.74	4.17	2960.35	1.01	0.03	-771.18	-909	-861	5.35	153.76	3.14	3.51	3.82	5337.11	4711.16	2955.56	4439.79	2886.41	1748.37	629	487	282	218	140	65
83	F	71	1.57	52	21.0962	0	1.24	56.3	1.02	0.822581	3.64	3.58	1.56	0.46	5.22	79.2	61.53	3.04	3617.4	77.75	2.15	-818.64	-962	-910	2.89	209.5	2.53	2.94	2.98	6775.43	4929.52	2297.06	24012.8	15222	6912.42	1107	574	271	672	244	121
84	M	64	1.78	89	28.0899	0	4.36	79	2.71	0.62156	8.2	3.65	1.72	0.39	8.47	86.5	60.4	7.96	8156.68	1345.06	16.49	-882	-983	-951	3.51	345.99	2.14	2.69	2.91	8668.13	8129.92	6678.89	95557.8	75711.8	49393.7	1835	1139	680	1392	609	309
85	M	84	1.64	69	25.6544	1	2.74	86.7	1.89	0.689781	6.4	4.37	1.4	0.45	3.95	58.3	51.51	4.5	3804.54	10.13	0.27	-782.75	-933	-888	4.88	177.01	3.17	3.61	3.85	6128.09	5185.16	3257.75	9355.61	6607.6	4380.96	597	492	294	223	125	72
86	F	68	1.55	50	20.8117	0	2.27	80.5	1.51	0.665198	2.35	2.35	1.21	0.29	4.15	61.9	62.96	4.91	3721.52	3.87	0.1	-788.54	-922	-878	5.57	143.97	3.04	3.3	3.66	3148.09	2539.6	2085.33	6268.39	4130.86	2369.61	457	416	305	199	136	71
87	M	80	1.73	45	15.0356	1	2.65	63.3	1.71	0.645283	4.12	3.08	1.15	0.48	4.27	52.9	40.97	4.34	3819.96	149.77	3.92	-807.9	-971	-919	3.7	231.52	2.33	2.62	2.58	5632.73	4022.49	2401.37	32285	20413.2	9607.21	1298	796	475	885	468	283
88	M	74	1.6	51	19.9219	0	2.02	57.5	1.32	0.653465	2.81	2.21	0.94	0.31	3.5	50.1	55.32	3.87	3048.13	319.09	10.47	-838.29	-999	-940	4.48	141.15	2.44	2.8	3.14	3084.89	2238.18	1072.9	33008.9	19283.7	7034.83	679	367	153	435	185	66
89	F	76	1.5	45	20	0	1.83	126.9	1.72	0.939891	3.86	3.8	3.02	1.34	5.77	101.9	60.78	4.61	3596.39	5.6313	0.156582	-805.482	-934	-897	3.83764	28.2215	4.24529	4.49803	4.01461	424.689	756.798	758.898	8833.11	7260.95	4501.54	29	46	45	9	10	8
90	F	66	1.62	53	20.1951	0	1.48	72.2	1.42	0.959459	4.4	4.4	2.26	0.85	6.92	100.5	60.05	4.55	2379.02	1.97	0.08	-743.84	-911	-852	4.53	161.39	2.52	3.03	3.32	4849.55	2865.04	1105.58	6905.45	3145.05	1142.74	891	385	135	530	170	47
91	M	75	1.68	37	13.1094	1	1.49	60.9	1.37	0.919463	2.22	2.22	1.73	1.19	1.59	23.2	65.38	4.01	4728.76	480.07	10.15	-847.29	-994	-940	3.1	260.31	2.09	2.34	2.51	3732.82	2996.43	1689.99	53520.7	30686.7	17405.2	1483	957	484	1119	614	277
92	M	59	1.7	43.5	15.0519	1	1.56	14.9	0.47	0.301282	2.53	0.31	0.22	0.14	3.41	37.5	66	7.05	7219.57	2491.03	34.5	-886.79	-1000	-975	4.26	66.07	4.53	4.65	4.5	471.45	966.61	1131.24	104720	84867.9	59061.5	26	68	80	5	14	11
93	F	61	1.65	68	24.977	0	1.6	55	1.32	0.825	3.59	3.33	1.81	0.47	3.89	50	53.93	4	2834.71	0.09	0	-698.66	-873	-825	5.32	180.75	3.2	3.52	3.85	7589.43	5754.75	3406.55	1994.54	1317.95	851.6	809	577	326	302	165	83
94	M	60	1.71	74	25.3069	1	3.58	74	2.4	0.670391	6.28	3.71	1.81	0.78	8.48	91.7	56.31	6.22	3161.6	0.06	0	-716.58	-885	-871	6.12	216.78	3.88	4.57	3.07	687.91	3366.06	1178.27	2160.96	6107.41	2734.97	46	516	62	13	11	10
95	M	77	1.78	71	22.4088	0	2.71	74	2.23	0.822878	5.12	4.84	2.22	0.59	6.91	78	50.58	6.51	4575.85	302.15	6.6	-841.61	-974	-934	3.75	171.44	2.08	2.46	2.68	4457.4	4235.79	2794.73	46853.1	31470.2	16620.9	1147	754	378	918	489	195
96	M	61	1.6	60	23.4375	0	3.4	100.8	2.67	0.785294	6.61	6.5	3.61	0.7	10.25	131.6	60.94	5.75	4625.85	10.6	0.23	-813.96	-936	-899	3.56	191.78	2.85	3.37	3.69	5312.23	6271.7	4441.57	11807	7412.43	4681.36	732	629	365	348	180	80
97	M	72	1.68	66	23.3844	0	2.39	74.1	2	0.83682	3.4	3.34	2.77	0.96	10.88	135.7	54.35	6.8	3140.94	27.21	0.87	-776.38	-947	-890	5.04	219.29	2.45	2.8	2.94	5865.92	3998.43	1624.57	17375.8	8475.9	3255.23	1146	543	224	735	274	112
98	M	55	1.78	58	18.3058	1	2.27	52.6	1.89	0.832599	3.1	2.93	2.3	0.94	5.57	54.7	53.79	4.68	6214.12	1375.71	22.14	-866.95	-1024	-966	2.97	317.76	2.22	2.66	2.74	6347.23	5915.41	3931.85	50579.2	39441.3	24885.8	1791	1078	648	1317	581	311
99	M	62	1.7	60	20.7612	0	3.69	75.5	2.29	0.620596	4.4	3.97	1.53	0.42	5.01	57	62.95	6.19	5179.06	593.75	11.46	-831.84	-1001	-938	4.31	206.77	2.95	3.35	3.56	5203.21	5502.82	4307	39258.3	29705.7	19466.8	662	635	495	290	195	141
100	M	69	1.75	69	22.5306	1	3.79	81.4	2.52	0.664908	5.01	4.1	1.87	0.85	6.12	68.1	35.55	4.16	6136.59	130.15	2.12	-836.13	-958	-919	4.54	230.81	2.96	3.38	3.72	5170.9	8121.83	6660.65	29460.2	23779.9	18782.7	582	633	503	238	177	103
101	F	57	1.63	60	22.5827	0	2.28	78	1.92	0.842105	6.36	5.77	2.94	0.69	5.27	66	55.07	4.16	2200.93	0	0	-714.23	-873	-831	5.71	124.65	3.12	3.59	3.82	4179.12	3341.45	1659.54	1575.29	1041.01	599.89	513	360	179	182	95	37
102	M	72	1.7	65	22.4913	0	2.03	54.1	1.6	0.788177	2.38	2.34	1.58	0.9	5.43	70.66	57.96	3.86	4255.2	86.02	3.83	-759.93	-986	-908	5.32	244.29	2.3	2.78	3.2	6232.45	4470.21	2267.78	27316.2	16365.7	6355.37	1497	704	275	1056	367	121
103	M	78	1.66	60	21.7738	0	2.21	68	1.71	0.773756	4.67	3.91	1.69	0.58	5.45	71.9	48.36	4.6	4578.9	280.97	6.14	-844.22	-983	-933	3.69	277.79	2.29	2.73	2.73	5799.34	4262.8	2271.73	51050.8	36545.7	21100.4	1523	833	439	1063	414	233
104	F	46	1.5	67	29.7778	0	1.64	65	1.44	0.878049	3.69	3.67	2.69	0.81	1.86	25	65.13	3.62	1753.76	0	0	-616.06	-832	-758	5.63	119.49	3.6	3.96	3.93	6174.19	4215.46	1794.3	261.74	188.31	73.43	488	309	132	128	71	30
105	M	56	1.63	55	20.7008	1	3.27	96.1	2.92	0.892966	6.87	6.84	5.26	1.76	7.74	88.6	41.91	5.14	2798.14	3.2125	0.114808	-726.249	-918	-865	4.46022	223.229	2.45054	2.78398	2.85394	5489.18	4015.9	1822.23	9215.34	5192.59	2508.21	1258	660	280	810	337	143
106	F	68	1.62	64	24.3865	0	1.95	79.1	1.73	0.887179	3.51	3.5	2.53	1.03	5.39	73.2	48.21	3.87	3777.38	214.52	5.68	-857.49	-978	-932	3.57	159.07	1.94	2.47	2.76	3664.06	3246.52	2095.29	50964.1	28045.8	16583.9	1144	598	295	955	368	136
107	F	75	1.62	66	25.1486	0	1.74	64.6	1.31	0.752874	2.35	2.11	1.19	0.49	5.5	78.2	10.79	3.59	3168.41	0.18	0.01	-776.36	-904	-863	3.95	134.83	2.98	3.38	3.76	4820.8	4439.49	2793.4	4409.25	2745.74	1438.46	571	493	298	226	142	62
108	M	66	1.58	62	24.8358	1	1.96	36.3	0.9	0.459184	1.86	0.93	0.39	0.13	2.08	28.2	75.33	4.39	3974.07	644.74	16.22	-815.24	-1079	-954	5.09	223.09	2.58	2.88	3.07	4548.69	4235.77	2268.33	20676.4	18661.7	8071.84	833	634	288	521	304	130
109	M	58	1.69	76	26.6097	0	2.77	71	2.24	0.808664	4.24	4.24	2.79	0.96	6.46	71	45.02	4.37	4926.66	65.97	1.34	-842.38	-952	-918	3.87	263.06	2.26	2.79	3.01	7591.49	6164.44	3703.33	40165.4	28754.9	15606.6	1480	834	483	1057	415	212
110	F	59	1.56	52	21.3675	0	2.4	103.9	2.19	0.9125	4.08	4.08	2.93	1.62	5.9	82.1	45.94	4.35	2131.46	1.00656	0.047224	-734.095	-913	-859	4.9443	156.873	2.60955	3.09263	3.33315	5059.98	3404.39	1203.74	7044.97	3398.24	1156.44	827	362	143	456	134	39
111	F	77	1.6	55	21.4844	0	1.09	44.1	0.8	0.733945	1.76	1.28	0.67	0.23	3.31	49.9	64.16	5.28	3164.73	81.58	2.58	-822.11	-962	-916	5.52	99.46	3.07	3.4	3.59	3462.13	3451.25	2406.63	15920	8513.23	4179	307	303	209	138	89	49
112	F	72	1.6	65	25.3906	0	2.53	83.1	1.66	0.656126	2.56	2.55	1.32	0.37	5.3	76.1	52.36	4.18	2866.66	1.88	0.07	-763.23	-917	-864	6.56	141	3.15	3.66	3.86	5460.87	4596.23	2462.1	36.34	9.38	1.17	572	404	204	221	103	41
113	M	62	1.58	50	20.0288	1	1.21	30.6	0.81	0.669421	1.79	1.14	0.37	0.3	1.1	14.1	78.94	4.05	3774.83	84.22	2.23	-826.36	-960	-917	4.31	286.67	2.24	2.75	3.13	5587.44	3700.67	2273.38	29304	19047.2	9628.84	1852	845	369	1278	429	167
114	F	69	1.6	49	19.1406	0	2.59	108.8	2.18	0.841699	4.83	4.83	4.28	0.92	6.84	97.9	58.63	5.29	3058.8	22.3229	0.729793	-755.145	-944	-882	3.8108	182.235	2.49169	3.19383	3.32969	3979.47	3432.06	1393.4	13435.7	7877.69	3715.76	860	429	180	520	149	53
115	M	80	1.68	60	21.2585	0	2.47	76.6	1.88	0.761134	5.59	3.93	1.69	0.65	4.64	62.4	56.1	5.02	4482.45	382.62	8.54	-856.96	-972	-940	3.7	134.03	2.83	3.21	3.61	3068.03	3745.81	3204.58	43577.1	31303.5	21488.1	418	448	345	205	143	78
116	F	72	1.57	64	25.9645	0	1.65	75.7	1.43	0.866667	2.24	2.24	2.12	1.13	4.43	65.6	58.96	4.04	2761.68	4.81	0.17	-782.25	-929	-880	4.76	204.45	2.38	2.7	3.15	5350.4	2981.01	1575.2	14402.7	7237.53	3020.28	1277	605	242	827	301	108
117	M	71	1.77	80	25.5354	0	3.86	85.5	2.69	0.696891	5.88	4.82	2.33	0.73	5.77	63.1	44.63	6.58	6209.28	877.43	14.13	-863.04	-992	-948	3.86	274.77	2.11	2.57	2.7	6061.4	4953.25	3265.95	91308.7	57833.4	43236.2	1490	875	525	1114	487	274
118	M	75	1.63	62.5	23.4375	0	3.12	86.3	2.17	0.695513	4.83	4.71	1.71	0.51	6.12	81.1	65.49	6.48	4279.64	207.85	4.86	-799.8	-979	-906	4.06	162.8	2.84	3.15	3.41	3826.63	4066.08	3078.42	24856.5	17824.6	10623.3	544	496	365	263	191	111
119	F	52	1.68	76	26.9274	0	2.22	71	1.95	0.878378	4.22	4.22	3.36	0.98	6.14	72	43.67	4.01	1978.41	39.12	1.98	-690.65	-984	-840	6.59	165.76	2.72	3.4	3.33	6573.68	3113.66	1080.57	1459.02	632.3	169.29	861	318	119	448	119	48
120	F	54	1.55	53	22.0604	0	1.89	70	1.56	0.825397	4.19	3.46	1.84	0.81	5.43	73	52.35	3.77	3849.19	85.59	2.22	-812.88	-963	-911	4.25	256.66	2.14	2.55	2.62	3807.27	2957.03	1697.9	43981.7	23541.8	14867.1	1325	791	436	1021	488	231
121	M	45	1.67	79	28.3266	1	2.97	74.2	2.59	0.872054	5.06	5.06	4.13	1.34	7.56	77.1	46.75	4.3	3022.88	0.18	0.01	-704.33	-891	-822	5.87	192.93	3.27	3.73	3.88	8201.81	6371.08	3650.2	1594.13	928.13	367.88	825	560	335	265	141	82
122	M	57	1.74	60	1.98177	1	3.63	75.2	2.52	0.694215	4.25	4.18	1.99	0.71	8.87	92.8	45.64	6.33	6173.65	165.44	2.68	-843.16	-965	-919	4.03	313.66	2.03	2.47	2.55	5451.35	5060.8	3961.43	46476	31694.2	19116.4	1985	1224	825	1560	717	480
123	F	71	1.62	75	28.578	0	2.33	74.7	1.49	0.639485	3.3	2.3	1.03	0.25	3.97	57	48.62	3.97	4523.99	32.76	0.72	-817.56	-946	-903	5.01	179.14	2.9	3.3	3.54	4660.22	5210.27	4536.56	18372.7	10836.2	6678.38	602	583	449	250	175	120
124	M	94	1.76	62	20.0155	0	2.19	71.9	1.7	0.776256	2.84	2.05	1.77	0.18	2.87	39.1	48.8	4.35	3015.4	26.15	0.87	-768.14	-948	-901	4.04	152.07	2.28	2.48	2.71	3440.94	2104.92	1209.44	19328.2	10431.4	5265.14	817	387	200	571	236	105
125	M	66	1.72	57	19.2672	0	2.51	75	2.29	0.912351	5.17	4.98	3.17	1.13	4.9	55.3	55.38	6.15	5886.73	397.43	6.75	-854.85	-988	-933	3.9	288.46	2.14	2.45	2.72	6340.96	5341.57	3668.55	59739.5	41351.3	26012.8	1628	1068	596	1240	655	301
126	F	53	1.58	64	25.6369	0	1.95	75.2	1.78	0.912821	4.51	4.51	4.1	1.11	7.51	97.7	50.85	3.84	1780.41	0.01	0	-641.89	-850	-787	5.62	120.59	3.27	3.68	3.97	4907.05	3081.4	1057.67	483.19	199.07	52.34	592	330	115	211	96	31
127	M	69	1.7	70	24.2215	0	2.56	69	1.99	0.777344	5.84	5.26	1.96	0.6	4.75	56	41	2.93	5020.65	1087.19	21.65	-850.46	-1024	-968	3.35	301.36	2.34	2.7	2.82	9214.73	7039.59	3938.69	48647	31615.4	17111.1	1761	1077	548	1187	569	279
128	M	80	1.6	66	25.7812	0	1.48	34.6	0.69	0.466216	1.9	0.64	0.33	0.17	5.73	91.4	49.72	4.37	4852.96	837.83	17.26	-857.75	-1008	-953	6.18	238.25	2.23	2.81	2.97	4944	4761.92	2619.49	59342.7	41013.9	22275.1	1108	751	417	776	364	173
129	M	72	1.65	53	19.4674	1	2.86	93	2.3	0.804196	3.25	3.25	2.95	1.07	4.87	65	48.74	4.33	3510.55	96.6418	2.86544	-769.531	-988	-896	5.82514	32.7159	4.1735	4.25543	5.25139	975.184	784.648	334.659	6501.16	852.814	229.889	64	46	18	14	8	1
130	F	64	1.58	59	23.634	0	2.52	102.5	2.06	0.81746	5.6	5.46	2.89	0.71	4.48	64.2	49.67	3.67	3353.71	11.8308	0.352769	-790.728	-936	-891	4.16637	229.785	2.44259	3.02721	2.93285	6835.59	5241.12	2337.29	19997.8	11919.3	5943.75	1371	662	344	880	276	163
131	M	73	1.68	45	15.9439	0	2.01	72.8	1.85	0.920398	6.88	6.72	3.68	1.1	8.75	114.9	73.73	6.83	3833.12	62.82	1.64	-828.13	-956	-911	3.48	178.49	2.11	2.59	2.93	3200.16	2524.08	1409.24	28258.2	17678.9	8526.34	1064	652	307	787	347	130
132	F	74	1.55	63	26.2227	0	1.34	68.8	1.18	0.880597	2.22	2.22	1.72	0.68	4.58	71.4	42.98	3.33	2141.09	82.5	3.85	-702.76	-1023	-867	5.42	181.44	2.59	3	2.93	5393.71	2745.16	557.51	3902.98	1354.62	285.39	1035	407	100	578	180	54
133	M	63	1.72	59	19.9432	1	3.14	72.2	2.27	0.72293	6.74	5.16	1.79	0.76	5.62	62.1	47.8	6.26	5692.95	346.25	6.08	-865.18	-978	-934	3.32	286.34	2.06	2.47	2.58	6072.61	5149.72	3306.93	61375.3	44028	25569.6	1855	1111	620	1447	673	346
134	M	77	1.65	56	20.5693	1	2.98	89.1	2	0.671141	4.22	3.7	1.39	0.48	4.57	66.6	35.66	3.88	4481.87	277.69	6.2	-840.54	-976	-933	3.76	150.22	1.91	2.29	2.5	3403.15	2991.63	1922.11	44926.2	29988.5	15465.3	1136	690	365	966	474	209
135	M	78	1.66	69	25.0399	0	2.91	79.3	1.97	0.676976	4.59	3.82	1.55	0.37	6.29	83.7	58.22	5.15	5662.21	317.81	5.61	-855.52	-970	-932	4.14	192.81	2.73	3.05	3.37	3000.16	4055.3	3842.57	40448.1	29557.2	19577.3	523	638	540	299	240	171
136	M	78	1.7	68	23.5294	1	1.63	32.7	0.93	0.570552	2.05	1.2	0.53	0.24	3.22	38.3	58.37	2.35	3809.17	60.38	1.59	-790.87	-958	-898	5.8	223.5	2.55	3.1	3.26	7854.46	5951.63	3162.23	22141.7	12597.2	5311.66	1104	624	274	677	270	113
137	M	85	1.68	53	18.7783	0	2.68	66.6	1.49	0.55597	2.12	1.81	1.03	0.48	2.09	30.1	39.42	3.3	3942.89	651.62	16.53	-831.08	-998	-953	5.42	165.89	3.32	3.52	3.91	4685.28	3522.35	2355.69	41418.8	32135.4	20754.4	522	393	244	191	122	63
138	M	79	1.7	70	24.2215	1	2.29	72	1.88	0.820961	6.54	4.52	2.48	0.12	5.2	66.3	43.99	4.93	3892.42	75.62	1.94	-819.49	-960	-911	4.49	208	2.22	2.67	2.88	5683.27	4118.6	2226.65	39832.6	20915.7	11876.4	1146	643	315	811	346	153
139	F	86	1.58	37	14.8213	0	1.5	109.6	1.34	0.893333	3.11	3.11	2.15	0.93	1.53	28.3	38.78	2.05	3784.3	104.12	2.75	-830.97	-967	-915	3.17	146.02	2.14	2.76	3.11	2860.9	2639.88	1440.43	35543.5	20421.4	12124.5	736	493	241	526	227	80
140	F	73	1.47	56	25.9151	0	1.96	125	1.77	0.903061	4.96	4.96	4.24	1.06	5.23	90	48.12	3.44	2376.55	0.528588	0.022242	-711.916	-904	-843	4.98265	128.671	3.12543	3.60125	3.87332	6125.6	3732.61	1259.04	3051.04	1269.75	261.452	637	326	117	236	82	26
141	M	74	1.75	52.5	17.1429	1	2.37	68.2	1.74	0.734177	4.09	2.78	1.64	0.53	8.98	118	51.51	5.38	4453.02	39.32	0.88	-828.15	-948	-908	4.22	164.53	2.75	3.1	3.42	3266.49	3787.96	3153.74	14287.9	10078.1	6978.77	528	529	425	288	187	121
142	M	72	1.7	72	24.9135	0	3.32	68.1	1.87	0.563253	5.48	2.31	1.05	0.4	7.92	97.4	64.01	6.25	6637.4	744.22	11.21	-872.09	-980	-945	5.42	341.59	2.13	2.72	2.96	8891.32	8145.21	5279.24	75244.1	55830.5	33842.9	1935	1182	646	1464	608	304
143	M	71	1.69	77.5	27.1349	0	1.84	28.1	0.79	0.429348	1.67	0.68	0.42	0.19	5.86	70.6	64.42	4.41	5506.46	103.08	1.9	-802.9	-946	-899	5.72	329.18	2.37	2.88	2.92	10796.4	8075.09	5148.53	60189.6	33716.7	18545.5	1631	919	587	1055	418	292
144	M	78	1.65	54	19.8347	0	2.74	76.6	1.84	0.671533	3.43	2.83	1.35	0.51	6.75	92.7	49.27	6.69	4264.18	192.59	4.52	-837.13	-972	-926	5.52	258.4	2.35	2.68	2.8	6455.54	4309.41	2381.54	38717	24662.3	12244.4	1457	824	407	958	424	199
145	M	75	1.72	52	17.5771	1	1.64	59.2	1.62	0.987805	3.14	2.82	1.5	0.93	5.34	65.8	62.09	5.66	4587.02	171.84	3.75	-830.19	-977	-919	3.43	169.63	2.83	3.27	3.34	3352.23	4131.34	2942.43	17924	13482.7	9251.47	538	521	408	288	186	116
146	M	76	1.57	60	24.3418	0	1.82	69	1.48	0.813187	4.61	4.19	2.02	0.53	4.9	74.2	52.89	4.22	3657.79	5.78	0.16	-790.62	-931	-886	4.5	156.16	2.85	3.31	3.47	4194.38	4743.63	3145.83	10672.9	6543.14	4185.79	591	570	379	261	198	106
147	F	57	1.6	76	29.6875	0	2.11	77	1.87	0.886256	4.85	4.85	2.6	0.92	6.23	79.7	52.35	3.89	3625.94	6.83	0.19	-816.18	-931	-892	4.96	202.48	2.21	2.76	3.09	6067.48	3983.6	2737.95	36766.3	20318.6	11745.1	1253	599	334	927	285	136
148	M	77	1.84	99.5	29.3892	0	3	73	2.5	0.833333	4.95	4.75	3.07	1.16	4.8	48	52.87	5.94	4751.26	64.33	1.35	-783.83	-955	-900	5.49	270.79	2.94	3.29	3.61	9785.84	8501.85	4516.63	22615.6	18169.9	8652.24	824	593	272	349	220	86
149	M	56	1.73	70	23.3887	0	3.57	90	3.05	0.854342	5.55	5.44	3.51	1.55	8.46	87.9	44.47	5.56	5764.01	19.8045	0.343589	-821.387	-937	-900	3.71706	308.551	2.32726	3.01557	3.33385	7513.91	6949.22	4539.58	34349.2	23516.5	15182.2	1565	929	530	1043	384	182
150	F	68	1.6	59	23.0469	0	1.64	67.9	1.44	0.878049	2.82	2.72	2.26	0.41	4.8	66.6	61.53	3.6	3247.28	8.35	0.26	-818.93	-937	-902	3.58	105.49	2.86	3.21	3.45	2434.3	3142.21	2674.18	11225.6	8712.64	6708.09	339	379	309	174	128	83
151	M	79	1.62	46	17.5278	0	1.26	43.6	0.99	0.785714	1.59	1.47	1.13	0.48	2.11	30.3	45.97	2.5	1130.66	12.9	1.14	-730.11	-952	-882	5.85	68.08	2.74	2.9	3.13	2299.51	729.71	167.77	3936.18	1318.09	209.91	381	114	22	203	53	10
152	M	69	1.6	57	22.2656	1	2.77	71.5	1.77	0.638989	3.01	2.81	1.38	0.33	4.07	55.1	51.7	4.83	3114.22	163.1	5.24	-806.96	-994	-914	5.34	159.97	2.38	2.83	3.14	4709.99	3045.23	1864.26	31780.9	13950.5	7621.37	772	389	185	494	190	76
153	M	65	1.72	49	16.563	1	2.48	69	2.12	0.854839	6.11	5.15	2.28	0.63	4.16	46.6	48.28	4.69	3548.81	126.91	3.58	-801.35	-977	-915	4.14	212.17	2.4	2.7	2.86	6307.98	3697.58	2109.61	28325.2	14121.7	7146.49	1243	554	293	815	304	158
154	M	70	1.72	58	19.6052	0	2.32	38.3	1.09	0.469828	1.63	1.11	0.57	0.29	3.8	45.4	69.18	5.29	6779.09	839.27	12.38	-860.57	-993	-945	5.36	153.84	3.21	3.34	3.25	1580.85	3242.47	3356.13	50492.2	43133.7	33272.8	198	364	401	78	115	125
155	M	64	1.65	65	23.8751	0	2.26	55	1.5	0.663717	4.32	2.38	0.94	0.44	8.45	106	54.89	6.2	5168.28	54.93	1.06	-843.14	-950	-916	5.55	16.59	4.22	3.85	4.07	258.38	445.47	236.64	3742.73	4142.02	636.84	16	29	18	2	5	3
156	M	86	1.6	56	21.875	0	2.07	71.3	1.39	0.671498	3.65	2.4	1.05	0.3	2.88	46.4	68.88	3.6	4366.77	750.27	17.18	-828.03	-1024	-956	3.69	270.57	2.45	2.72	2.8	7619.45	5769.71	3220.39	33440.2	20474.4	9475.17	1416	861	444	904	465	254
157	F	74	1.6	66.5	25.9766	0	1.81	77	1.39	0.767956	4.56	4.37	1.41	0.26	4.75	72	62.17	4.08	2818.38	15.15	0.54	-790.7	-940	-887	5.03	135.87	2.59	3.16	3.75	4481.67	4193.88	2010.06	12454.3	7789.6	2566.38	511	343	137	285	122	33
158	M	87	1.61	58	22.3757	0	1.71	45	0.96	0.561404	2.8	1.08	0.56	0.24	2.62	39	64.79	4.27	4560.75	646.54	14.18	-855.76	-994	-948	4.83	270.14	2.42	2.72	2.93	8529.86	6206.15	3792.11	52965.7	34469.6	19726	1518	873	463	1012	457	219
159	M	76	1.6	60	23.4375	1	2.03	67.8	1.55	0.763547	5.1	2.84	1.35	0.55	4.92	70.6	49.27	3.95	4891.57	1043.58	21.33	-883.06	-993	-956	3.43	261.44	2.27	2.63	2.77	7099.71	5842.61	3112.55	71173.7	47863.3	26743.2	1517	956	516	1075	539	273
160	F	67	1.53	70	29.903	0	2.21	101.9	2	0.904977	6	6	4.23	1.2	6.66	96.7	58.64	4.45	1904.01	0.004916	0.000258	-636.038	-855	-790	6.67463	140.449	3.50813	3.78215	3.92448	6105.19	4541.04	1706.04	607.669	279.253	75.7129	608	390	137	214	114	40
161	F	47	1.6	48	18.75	0	2.22	77.2	2	0.900901	3.56	3.44	3.04	1.2	6.75	82.9	50.02	3.88	2531.71	1.35	0.05	-744.67	-906	-841	4.55	153.13	2.31	2.73	2.81	3749.29	2084.31	845	5890.3	2871.08	1106.27	970	433	185	636	206	83
162	F	81	1.58	52	20.83	0	1.45	70	1.15	0.793103	2.9	2.87	1.35	0.36	4.51	72	63.19	3.98	2350.43	2.96	0.13	-730.63	-917	-855	5.63	117.29	2.88	3.34	3.85	3141.88	2432.76	925.98	3540.34	1994.02	559.62	585	406	132	273	144	35
163	M	80	1.72	82	27.7177	1	2.44	67.5	1.78	0.729508	7.44	4.65	1.79	0.42	7.35	92.6	55.07	4.74	2852.97	249.94	8.76	-767.74	-1024	-920	4.72	202.48	2.81	3.25	3.53	8937.33	5125.87	1983.66	12060.3	5002.63	1698.34	938	446	151	477	167	55
164	M	71	1.73	74	24.7252	1	3.56	76.3	2.25	0.632022	5.06	3	1.44	0.54	5.74	66.4	60.78	5.82	5722.5	203.91	3.56	-825.01	-969	-918	4.39	231.15	3	3.4	3.75	6037.8	6835.99	6065.89	28350.4	18110.3	10861.8	670	658	512	274	199	117
165	F	65	1.55	50	20.8117	0	2.06	84.5	1.68	0.815534	3.28	3.26	1.71	0.71	5.1	73.6	51.24	4.35	3096.01	39.9106	1.2891	-775.387	-954	-898	4.60704	206.658	2.39845	2.79451	2.84686	3816.21	2705.8	1211.4	16144.5	8959.01	4129.59	1055	526	235	664	248	113
166	M	69	1.7	59	20.4152	1	3.06	68.2	1.96	0.640523	4.78	3.56	1.31	0.31	4.11	48.7	50.86	5.07	3908.33	53.88	1.38	-797.36	-955	-899	4.31	197.07	2.99	3.34	3.69	5474.82	5204.41	3561.08	24444.4	17020.8	11625.2	766	640	395	324	223	97
167	M	84	1.72	60	20.2812	1	1.62	62.7	1.26	0.777778	2.86	2.86	1.46	0.45	4.4	69.5	62.74	4.86	2988.65	104.99	3.51	-730.41	-996	-848	8.07	26.9	4.5	4.42	4.87	744.03	836.24	313.6	5559.36	6130.37	0	33	48	21	6	10	1
168	M	57	1.7	55	19.0311	0	1.55	46.2	1.53	0.987097	3.68	3.68	3.64	1.93	2.13	22.5	55.83	4.34	3762.95	38.57	1.02	-714.3	-950	-881	4.5	134.86	2.28	2.42	2.74	3024.27	2596.54	1407.9	16845.5	11793.8	6279.63	752	549	246	533	350	126
169	M	74	1.73	65	21.7181	1	2.66	66.1	2.05	0.770677	5.15	3.61	2.02	0.75	4.18	46.1	61.59	4.56	2985.86	8.59	0.29	-721.08	-921	-853	4.66	227.68	2.63	2.82	3.09	5420.92	3332.78	1735.26	8589.28	4270.76	1544.57	1043	567	233	605	290	107
170	F	75	1.55	45	18.7305	0	1.51	65.3	0.98	0.649007	1.56	1.18	0.56	0.33	6.44	108.2	81.54	7.47	2024.02	2.46	0.12	-725.57	-918	-854	5.25	178.35	2.45	2.68	2.62	3339.86	1975.04	645.95	4740.77	1683.02	512.58	983	442	138	608	249	86
171	F	51	1.6	56	21.875	0	2.04	66.3	1.67	0.818627	3.51	3.26	1.62	0.45	4.32	54	54.43	3.93	2367.46	0.44	0.02	-745.9	-904	-857	4.85	167.6	2.69	3.02	3.23	4700.54	2449.75	1052.13	6559.56	3173.42	1071.38	816	357	126	423	151	54
172	M	70	1.75	75	24.4898	0	3.14	78.1	2.39	0.761146	6.13	5.3	2.58	0.83	9.1	102	61.05	6.63	5950.54	62.11	1.04	-838.06	-950	-912	4.29	228.14	1.9	2.46	2.78	4691.04	4960.83	3230.94	66557.2	41894.6	28803.8	1274	853	469	1037	525	221
173	M	72	1.72	70	23.6614	1	2.37	51	1.46	0.616034	3.68	2.88	0.89	0.38	2.83	34	63.17	4.41	3781.15	695.51	18.39	-811.18	-1024	-963	4.69	235.18	2.51	2.85	3.16	7053.05	4561.66	2649.1	30060	20617.7	11326.4	1169	667	297	715	308	123
174	M	67	1.7	72	24.9135	0	2.94	72.8	2.14	0.727891	5.71	5.71	2.29	0.44	5.95	69.4	44.03	5.43	4029.84	26.19	0.65	-797.99	-943	-896	4.91	307.62	2.43	2.65	2.75	7924.6	5490.14	2671.12	23610.3	14876.3	7591.62	1696	1005	460	1061	547	247
175	M	81	1.7	50	17.301	0	1.81	53.5	1.28	0.707182	3.66	2.11	1	0.45	4.53	62	56.35	4.93	4189.93	168.09	4.01	-836.01	-973	-923	5.11	177.59	2.76	3.19	3.41	3616.57	4101.17	2820.63	25853.2	14441.7	7960.17	603	565	440	320	202	140
176	F	68	1.6	80	31.25	0	1.67	64.6	1.32	0.790419	3.86	3.86	1.59	0.44	6.66	94.3	58.75	3.94	3545.85	69.3	1.95	-814.09	-959	-910	5.18	204.14	2.74	3.3	3.57	7179.98	6000.2	4288.98	21101.8	16241.5	10801.5	937	633	404	476	200	121
177	F	75	1.47	70	32.3939	0	1.67	80.5	1.13	0.676647	2.26	2.03	0.97	0.29	5.49	95.4	54.23	3.66	3355.43	12.38	0.37	-778.96	-933	-880	5.66	178.77	2.52	2.88	3.12	5461.74	3863.74	2246.29	15377.3	8533.36	4020.8	839	503	246	498	214	94
178	F	46	1.6	53	20.7031	0	1.79	58.7	1.65	0.921788	4.14	4.14	3.87	1.53	3.9	45.4	57.26	3.57	1976.01	0.09	0	-745.23	-899	-858	4.09	101.01	3.06	3.36	3.76	3950.96	3069.75	1587.84	2165.34	1492.22	873.7	482	327	173	205	101	34
179	M	77	1.7	80	27.6817	0	3.15	83.5	2.12	0.673016	5.01	4.03	1.56	0.2	5.81	76.1	44.03	5.23	4755.81	48.69	1.02	-806.28	-950	-897	4.39	159.37	2.97	3.21	3.38	4235.12	5478.65	4381.57	13593.4	7542.64	4344.21	423	500	404	190	152	107
180	M	65	1.77	88	28.089	1	2.34	68.7	2.02	0.863248	4.67	4.2	3.34	1.06	5.14	60.2	63.32	3.71	3617.07	3.98	0.11	-766.84	-923	-876	4.96	184.73	3.21	3.51	3.79	7062.4	5860.31	4036.76	8873.07	6684.85	4435.91	713	581	373	217	155	92
181	M	82	1.68	65	23.03	0	1.95	54.1	1.29	0.661538	2.22	1.69	1.06	0.55	4.4	60.4	60.28	4.05	3528.7	13.75	0.39	-797.77	-938	-894	4.4	147.73	2.93	3.31	3.55	3883.19	3647.99	2313.08	10451.6	6694.55	4167.39	515	459	285	235	157	82
182	M	64	1.64	56	20.8209	0	1.44	33	0.92	0.638889	2.62	0.91	0.49	0.23	2.37	29	64.3	4.68	6253.14	2181.81	34.89	-857.82	-1024	-997	4.44	425.16	2.7	2.85	3.18	8413.6	7602.37	5127.44	98956.6	60838.5	31336.6	1420	1144	657	804	593	267
183	M	83	1.78	62	19.5682	0	2.41	77	2.04	0.846473	3.91	3.89	2.85	0.78	3.56	44	49.8	4.04	5373.65	221.36	4.12	-840.56	-971	-924	3.11	240.43	2.06	2.6	2.9	5184.82	4596.12	3111.59	54386.6	29012.6	16112.4	1277	787	415	974	422	193
184	M	72	1.68	66.5	23.5615	0	2.63	76.1	1.96	0.745247	3.22	3.22	2.02	0.64	7.55	98.3	63.28	4.63	5227.42	398.14	7.62	-866.13	-973	-939	4.05	269.1	2.21	2.61	2.62	7382.39	5964.48	4036.29	57418.2	40353.6	23145.3	1668	995	632	1235	556	344
185	F	61	1.56	60	24.6548	0	2.54	114	2.35	0.925197	3.62	3.62	3.38	1.77	5.96	84	34.82	4.54	2174.91	106.488	4.89619	-702.68	-1023	-889	4.83205	173.606	2.56408	3.24491	3.0318	5954.68	3555.82	1241.03	4670.84	2479.56	874.739	907	381	129	540	148	65
186	F	69	1.48	43	19.6311	0	1.63	66	1.29	0.791411	3.17	2.79	1.08	0.37	4.44	64	60.1	3.81	2733.32	4.23	0.15	-784.72	-921	-875	4.66	116.98	2.86	3.16	3.2	2426.51	2300.23	1365.67	5472.56	3998.34	2081.91	476	389	236	227	132	78
187	M	74	1.6	55	21.4844	0	1.22	37.1	0.81	0.663934	2.52	0.99	0.57	0.25	2.75	41.2	56.25	2.82	3597.84	134.86	3.75	-812.41	-966	-926	4.45	287.22	2.43	2.75	3	5365.14	4093.94	2117.05	37218.2	22004.4	11274.4	1316	778	373	898	412	172
188	M	60	1.6	59	23.0469	1	2.53	77	2.08	0.822134	6.25	6.09	3.01	0.77	5.89	75	26.11	3.22	2837.7	224.18	7.9	-787.5	-1023	-918	4.51	206.6	2.44	2.74	2.8	5188.13	2688.51	1203.95	9144.84	4105.43	1637.09	1090	472	210	675	239	113
189	M	56	1.76	90	29.0548	0	3.11	71.4	2.63	0.845659	7.66	7.45	3.12	1.18	5.91	56.8	32.24	4.18	1928.29	48.92	2.54	-678.91	-1002	-848	5.27	166.76	2.89	3.41	3.58	6538.58	3356.29	893.98	1791.67	728.09	244.7	678	253	61	339	108	26
190	M	80	1.8	82.5	25.463	0	2.4	63.3	1.89	0.7875	4.28	4.19	1.84	0.51	6.71	76.1	58.72	5.18	3829.24	14.49	0.38	-785.7	-937	-887	4.97	177.8	2.94	3.38	3.79	4250.73	5103.99	3798.25	14142	9203.47	6395.58	661	576	391	315	174	88
191	F	84	1.5	44	19.5556	0	1.71	87.7	1.12	0.654971	3.57	1.98	0.74	0.19	3.17	57.6	56.66	3.53	3346.9	115.47	3.45	-840.43	-967	-920	3.95	135	2.15	2.72	2.94	3905.48	2965.32	1570	42418.2	23284.2	12979.9	841	436	229	622	223	95
192	F	66	1.59	75	29.6665	0	1.97	74.5	1.55	0.786802	4.63	4.5	2	0.48	2.95	41.4	57.39	3.38	3577.27	1.16	0.03	-774.97	-913	-868	4.6	193.25	2.95	3.58	3.92	6809.34	6730.84	4149.61	7017.09	4965.58	2952.95	795	623	372	330	155	84
193	M	69	1.68	50	17.7154	0	2.23	69.9	1.95	0.874439	3.43	3.43	1.9	0.84	5.34	65.1	49.39	4.61	5393.08	227.39	4.22	-848.68	-970	-925	3.58	267.36	2.25	2.62	2.72	5888.69	4444.29	2943.61	45446.8	30928.3	19747.4	1433	885	533	976	479	258
194	F	76	1.58	46	18.4265	0	1.8	93.6	1.71	0.95	2.12	2.12	2.12	1.47	6.59	99.3	60.05	3.92	4133.56	157.719	3.81556	-820.678	-998	-915	3.38521	60.0801	4.11699	3.91259	4.35497	1027.91	1079.38	891.078	4582.03	4593.75	2363.28	85	94	53	21	19	11
195	M	70	1.5	60	26.6667	0	2.37	63.7	1.27	0.535865	3.11	1.47	0.69	0.23	3.55	57.8	52.02	4.85	2931.1	400.65	13.67	-803.39	-1024	-945	4.99	201.97	2.45	2.64	2.74	4791.04	2682.28	1164.32	16761.9	8597.64	3897.85	1110	521	243	731	285	133
196	F	66	1.52	60	25.9695	0	1.26	39	0.75	0.595238	1.46	1.08	0.45	0.2	2.16	32	67.87	3.03	1983.11	159.16	8.03	-697.65	-1024	-909	6.8	204	3.16	3.34	3.19	10297.5	4040.75	570.54	6750.83	1606.3	133.11	1012	359	38	441	137	16
197	M	76	1.66	49	17.782	1	2.32	74.3	1.94	0.836207	4.56	4.56	2.66	0.62	7.17	91.8	72.76	4.75	2666.28	0.29	0.01	-726.55	-900	-850	5.39	151.39	3.15	3.48	3.64	5572.34	4996.67	2897.12	4453.13	2658.8	1623.19	699	507	299	251	156	85
198	F	75	1.68	58	20.5499	0	2	70.5	1.56	0.78	3.47	2.75	1.83	0.56	5.39	72.6	58.54	4.36	1749.91	0.1	0.01	-675.1	-884	-823	6.04	51.47	2.89	3.12	3.28	2455.23	1598.85	443.2	1555.77	955.83	235.31	288	214	50	134	72	13
199	M	77	1.67	50	17.9282	0	2.23	48.1	1.17	0.524664	2.41	1.39	0.61	0.31	6.58	89.6	80.51	6.5	5653.51	467.61	8.27	-861.21	-980	-938	3.84	279.08	2.17	2.47	2.63	5663.83	4557.41	3079.35	82637.1	52920	42711.5	1459	926	555	1066	544	294
200	F	54	1.46	47	22.0492	0	1.36	64.8	1.21	0.889706	2.12	2.12	1.94	0.86	4.96	74	52.52	2.51	1481.7	1.64	0.11	-702.22	-907	-834	5.13	122.42	2.47	2.76	3.6	2740.62	1206.55	170.54	2261.73	704.52	84.02	707	235	24	442	128	9
201	F	62	1.6	54.7	21.3672	0	1.43	54.1	1.2	0.839161	3.46	3.46	1.66	0.49	5.9	79	62.74	3.18	1965.06	0.15	0.01	-691.64	-875	-816	5.52	118.92	3.6	4.22	4.32	4374.62	3941.29	2644.98	655.91	396.83	181.99	335	231	169	84	40	29
202	F	55	1.6	50	19.5312	0	2.32	91.9	2.17	0.935345	5.6	5.54	4.64	1.73	6.81	88.8	44.84	3.69	2280.15	0.266155	0.011673	-699.521	-884	-828	5.01257	212.053	2.5093	2.75234	2.8	4373.88	2891.65	1085.23	3715.04	2010.6	805.773	1133	570	208	665	297	117
203	M	72	1.67	67.5	24.2031	0	1.71	28.1	0.78	0.45614	1.59	0.7	0.39	0.15	3.8	76.4	69.34	5.08	6319.59	1322.24	20.92	-871	-1000	-959	5.09	262.82	2.96	3.31	3.68	6150.14	7060.69	6061.83	67117.9	57983.6	49320.1	735	756	566	302	237	126
204	M	41	1.67	77.5	27.7887	0	3.16	58.1	2.07	0.655063	3.96	2.4	1.34	0.35	7.99	80.3	51.14	6.46	6109.72	326.76	5.35	-857.08	-969	-932	5.56	203.34	2.87	3.14	3.46	3707.9	5196.25	4472.28	38955.9	30023.8	21579.5	477	651	498	254	223	141
205	F	57	1.62	45	17.1468	0	1.82	63.9	1.57	0.862637	4.07	4.07	2.03	0.81	5.46	69.1	55.83	3.79	2972.08	84.25	2.83	-773.21	-971	-902	4.28	269.33	2.52	2.74	2.92	3756.31	2577.63	1109.61	16300.8	10259.4	4960.19	1125	694	299	702	382	151
206	F	65	1.45	40	19.025	0	2.03	100.8	1.76	0.866995	3.77	3.77	2.61	0.85	5.13	79.6	55.79	5.75	4002.07	147.521	3.68611	-845.074	-961	-931	1.94093	23.0473	4.41175	4.18213	4.58056	433.575	300.05	338.997	36107.3	33000.2	18045	38	29	26	9	8	3
207	M	74	1.82	77.5	23.3969	0	3	60.8	1.68	0.56	3.53	2.36	0.83	0.28	6.15	71.9	66.08	5.83	5887.95	176.6	3	-843.83	-963	-924	4.11	202.34	3.14	3.36	3.8	6152.63	6441.33	5780.85	30293.1	26030.9	20117.5	529	565	426	209	158	84
208	F	72	1.64	90	33.4622	0	1.84	72.5	1.54	0.836957	2.78	2.78	2.44	0.57	4.74	65.4	59.12	4.09	2775.98	0.17	0.01	-713.45	-894	-843	5.21	146.47	3.06	3.5	3.78	4826.02	4393.92	2371.58	3906.59	2578.17	1640.12	602	433	265	251	124	61
209	F	78	1.6	53	20.7031	0	1.67	74.6	1.36	0.814371	2.56	2.13	1.81	0.53	3.29	49.7	52.88	3.47	2337.39	158.16	6.77	-757.12	-1023	-904	4.95	127.49	2.69	3.11	3.57	3954.26	2191.09	957.8	7018.43	2719.11	909.09	579	281	93	307	103	29
210	M	65	1.68	59	20.9042	1	2.51	75.9	2.01	0.800797	4.59	4.01	2.45	0.74	6.91	88.5	44.26	5.1	4145.43	21.75	0.52	-801.75	-939	-888	4.72	234.96	2.23	2.83	2.93	6443.43	4725.95	3031.72	21742.2	14431.6	7359.09	1444	733	442	1051	376	207
211	F	55	1.5	61	27.1111	0	2.11	108.4	1.95	0.924171	4.7	4.7	3.79	1.49	7.75	118.8	53.15	3.76	2318.75	0.65364	0.028189	-720.025	-901	-837	4.9382	198.912	2.65035	3.17963	3.08103	6489.58	4272.39	2103.75	5921.59	3257.41	1235.01	1075	503	208	589	192	90
212	F	51	1.5	46	20.4444	0	2.81	118.3	2.42	0.86121	4.74	4.74	3.51	1.41	4.76	67.8	47.81	4.11	2663.08	51.4799	1.9331	-795.177	-961	-908	3.74667	179.389	2.37012	2.88315	2.78834	3979.97	2834.04	1251.36	17713.8	9738.27	3974.26	997	511	223	636	240	111
213	F	76	1.6	65	25.3906	0	1.57	67	1.28	0.815287	2.5	2.5	1.93	0.48	4.94	72.6	44.27	3.31	1860.11	1.47	0.08	-701.28	-900	-824	6.39	148.54	3	3.22	3.45	4979.88	2380.04	890.93	3620.64	1433.24	549.83	611	296	105	266	125	36
214	M	69	1.75	55	17.9592	0	3.49	79.5	2.46	0.704871	7.52	5.13	2.23	0.55	9.1	101.2	56.48	7	5698.13	335.79	5.89	-863.34	-975	-934	2.91	212.65	2.39	2.96	3.38	3755.49	4579.06	3120.24	50145.2	42724.9	24957	634	636	339	424	253	86
215	F	46	1.6	48	18.75	0	2.03	62.1	1.6	0.788177	3.57	3.36	1.74	0.54	6.94	85.6	60.03	3.99	3594.82	586.15	16.31	-832.62	-1075	-954	3.87	181.3	2.39	2.76	2.96	3497.55	3502.78	2073.92	19780.2	18059.3	9672.49	714	590	326	500	290	141
216	F	64	1.62	52	19.8141	0	2.28	99	2.24	0.982456	4.7	4.53	3.42	1.26	5.52	73	42.94	5.15	2426.58	8.7	0.36	-747.02	-935	-884	5.08	203.58	2.61	3.07	2.97	4847.32	2549.68	1194.06	10961	5286.41	2586.45	1000	410	192	553	181	96
217	M	92	1.65	55	20.202	0	3.15	108.8	2.17	0.688889	4.66	4.13	1.8	0.47	2.94	46.1	49.44	4.57	2975.88	17.38	0.58	-748.57	-942	-884	5.06	161.35	3.31	3.62	3.57	4832.57	3707.91	2371.05	6753.31	4381.52	2169.49	557	405	276	190	109	92
218	M	64	1.55	75	31.2175	0	1.41	33	0.79	0.560284	2.36	1.26	0.41	0.14	5.73	61.9	51.36	2.52	4884.82	921.18	18.86	-741.91	-1024	-969	4.54	507.06	2.89	2.99	3.09	11734.4	9033.4	6110.1	38434	25557.2	13930.7	1558	1084	638	845	569	320
219	M	77	1.67	56	20.0796	0	2.18	56.3	1.39	0.637615	2.84	2.21	0.95	0.45	4.3	57	66	4.91	4532.58	422.81	9.33	-843.51	-989	-938	4.46	276.99	2.26	2.64	2.75	5437.76	3878.06	2066.81	48224.9	31651.7	15580.8	1604	945	443	1130	539	231
220	M	60	1.72	75	25.3515	1	3.45	92.9	2.99	0.866667	7.5	7.5	4.92	1.47	8.87	95.9	55.26	6.22	5497.09	2.92422	0.053196	-790.645	-921	-882	4.3589	50.895	4.12229	4.23906	4.39061	1181.59	1553.56	1487.06	6436.67	6669.93	4090.53	55	77	67	10	6	8
221	M	57	1.72	75	25.3515	0	3.08	72	2.41	0.782468	5.12	5.06	3.4	0.73	4.99	52	44.47	4.76	4333.41	17.96	0.41	-790.18	-936	-889	4.13	218	3.12	3.52	3.67	7103.41	6672.05	4207.4	8102.65	4914.3	3071.74	731	580	408	254	147	101
222	M	77	1.68	55	19.487	1	1.91	64.7	1.71	0.895288	3.85	3.85	2.39	1.16	5.07	64.1	58.11	4.49	3316.28	0.52	0.02	-703.18	-880	-825	5.1	180.71	3.23	3.61	3.71	6299.53	5754.03	2970.82	1389.22	907.69	462.74	690	533	293	275	165	81
223	F	72	1.55	35	14.5682	1	1.14	45	0.71	0.622807	1.74	0.93	0.48	0.19	3.2	52.5	60.84	7	3310.14	555.31	16.78	-806.59	-1024	-956	4.91	191.96	2.31	2.44	2.66	4209.59	3014.29	1161.78	24660.3	15171.2	7782.09	1104	663	278	749	413	155
224	M	74	1.75	76	24.8163	0	2.22	57.1	1.68	0.756757	5.32	3.64	1.3	0.65	5.66	65.4	68.26	5.82	4421.45	109.75	2.48	-835.66	-964	-917	4.63	209.39	2.51	3.13	3.46	6186.69	6907.93	3682.35	26280.4	21881.6	10075.3	711	579	293	422	208	84
225	F	70	1.55	40	16.6493	0	1.09	51.9	1	0.917431	2.04	1.96	0.86	0.26	4.31	63.2	59.85	3.49	3231.85	92.19	2.85	-790.94	-972	-902	4.42	228.6	2.17	2.45	2.59	3017.53	1812.78	1040.7	23344.9	13161.1	7298.47	1239	649	326	910	383	186
226	M	78	1.72	65	21.9713	0	2.45	65	1.68	0.685714	2.29	2.02	1.46	0.67	3.48	45	49.09	4.91	4731.31	54.91	1.16	-810.26	-951	-904	4.03	271.91	2.31	2.8	2.86	6550.49	5163.27	3026.48	29802.9	18822	9900.28	1489	845	469	1031	415	232
227	M	80	1.76	85	27.4406	0	2.76	65.3	1.86	0.673913	4.96	3.43	1.63	0.37	6.9	81.8	60.78	5.09	5475.88	194.43	3.55	-840.95	-968	-923	4.33	156.54	3.12	3.13	3.5	3501.48	3954.51	3370.93	33489.5	24951.5	17799.8	335	419	348	150	162	87
228	M	85	1.59	57	22.5466	0	1.68	67	1.27	0.755952	2.52	2.41	1.17	0.56	3.07	51	58.3	3.99	2653.91	2.08	0.08	-718.15	-918	-854	5.29	133	3.07	3.28	3.53	4195.65	2699.19	1483.23	11250.9	8274.67	4680.52	592	423	215	263	164	75
229	F	68	1.7	58	20.6905	0	2.46	81	1.55	0.630081	2.92	2.04	1.11	0.4	6.61	97	47.43	4.81	4350.62	58.78	1.35	-846	-952	-926	4.83	40.32	4.97	4.55	4.56	616.57	1154.27	942.82	16446.6	17264.2	8704.91	34	67	54	4	12	11
230	M	52	1.75	55	21.883	1	3.67	101.5	3.46	0.942779	7.88	7.88	5.35	2.53	8.7	90	44.67	6.43	6049.24	833.853	13.7844	-871.667	-983	-948	2.78291	266.971	1.94142	2.53928	2.8822	5651.83	5840.67	4159.61	72217.6	51784.9	35395.4	1607	1029	580	1341	614	262
231	M	78	1.62	55	20.9572	0	1.67	36.2	0.82	0.491018	2.52	0.81	0.35	0.14	2.96	42.6	64.32	6.5	5876.46	2467.55	41.99	-906.87	-1011	-975	3.84	235.96	2.09	2.52	2.79	5067.92	4226.1	3091.86	98724.5	74374.6	47505.9	1411	880	537	1079	517	251
232	M	60	1.78	79	24.9337	1	3.57	94.7	3.3	0.92437	7.37	6.52	4.16	1.76	8.19	82.6	46.75	5.93	7602.05	183.236	2.41035	-847.636	-960	-923	4.27431	43.7565	3.99414	4.48063	4.22625	577.185	890.361	1160.31	4466.13	5044.64	2961.5	34	63	63	7	10	9
233	F	64	1.56	61.8	25.3945	0	2.01	78.2	1.54	0.766169	4.45	3.51	1.58	0.5	5.61	81.4	58.25	3.99	3173.26	9	0.28	-821.6	-936	-898	4.72	203.56	2.49	2.73	2.87	5767.31	3548.87	1864.48	21986.2	12821.5	6000.76	1186	600	302	724	304	147
234	M	69	1.71	62.5	21.3741	1	2.47	64.2	1.92	0.777328	5.99	4.01	2.3	0.56	7.27	83.4	54.49	4.75	4334.43	36.79	0.85	-834.33	-948	-911	3.82	156.31	2.84	3.18	3.56	4037.62	4532.25	3199.71	19585.5	12711.5	8366.8	519	515	374	252	164	100
235	M	47	1.8	86	26.5432	0	4.2	88.2	3.48	0.828571	6.72	6.61	4.68	1.61	9.9	90.1	38.31	6.22	5840.03	1.77155	0.030335	-808.942	-921	-888	4.23849	102.577	4.89382	4.78433	5.00108	2069.4	3014.34	3116.75	166.526	102.75	38.9742	75	122	114	12	11	7
236	M	78	1.7	50	17.301	0	1.06	36	1.05	0.990566	3.52	3.52	3.03	1.52	5.41	70.66	46.13	1.99	3274.92	123.03	3.76	-806.38	-988	-915	2.97	247.09	2.42	2.67	2.69	4639.79	3698.76	1889.82	29220.3	17630	7919.83	1169	691	335	757	401	183
237	M	73	1.73	70	23.3887	1	2.84	72	2.06	0.725352	3.09	2.93	2.18	0.63	5.29	63	49.82	4.91	5107.17	95.35	1.87	-831.18	-958	-913	4.3	292.16	2.22	2.64	2.68	8154.15	6124.41	3680.35	39083.5	24993.4	12284	1874	1092	576	1346	604	313
238	M	69	1.6	72	28.125	0	1.72	37.8	0.92	0.534884	2.36	1.19	0.42	0.12	5.74	78.3	58.37	3.66	3957.78	345.37	8.73	-839.08	-983	-935	4.52	179.72	2.51	2.85	3.13	4371.33	3159.64	1935.97	39327	21868.7	10752.9	819	529	295	479	240	109
239	M	65	1.7	60	20.7612	0	3.87	119.2	3.57	0.922481	8.83	8.55	5.52	2.7	6.65	76.5	49.39	5.36	6444.04	586.879	9.10732	-864.901	-975	-942	2.51664	375.133	2.24712	2.67066	2.72812	7730.15	6384.41	4475.92	76399	54377.7	36162.1	2146	1212	736	1499	599	380
240	F	68	1.53	50	21.3593	0	1.47	66.3	1.16	0.789116	2	2	1.41	0.48	5.39	83.4	60.04	4.09	2159.86	0.23	0.01	-721.29	-896	-840	5.59	128.22	3.13	3.55	3.64	4070.19	2817.09	991.78	2552.52	1241.5	395.4	636	364	135	251	123	39
241	M	48	1.8	105	32.4074	0	3.53	80	3.12	0.883853	8.3	8.08	5.49	1.52	7.72	71	30.6	5.12	5642.12	12.6651	0.224474	-788.005	-932	-886	4.4066	388.897	2.52713	3.08897	3.16098	15621	13156	7947.65	28355.7	19949.9	11815.7	2182	1140	672	1296	460	267
242	F	52	1.57	49	19.8791	0	2.77	99	2.33	0.841155	5.72	5.54	2.54	1.06	8.22	107.5	46.49	4.11	4305.15	81.3393	1.88935	-836.458	-956	-922	3.33636	263.956	2.19257	2.66596	2.74738	4549.25	3002.82	2104.74	34376.1	23315.6	14740.9	1683	851	539	1223	420	261
243	F	87	1.52	49	21.2084	0	1.41	87.7	0.98	0.695035	2.21	1.82	0.75	0.29	5.18	99.7	62.47	4.56	3906.16	57.91	1.48	-839.79	-954	-917	4.32	113.5	3.02	3.22	3.57	2566.38	2990.71	2565.79	18302.5	14118.8	10135.7	305	328	268	137	108	59
244	F	76	1.5	50	22.2222	0	0.96	53	0.78	0.8125	2.37	1.79	0.88	0.28	5.39	70.66	10.79	0.97	2033.74	3.82	0.19	-768.77	-925	-869	5.45	142.42	2.4	2.55	2.76	3411.36	1548.55	460.6	8321.11	3759.04	931.78	831	355	105	546	205	52
245	M	49	1.7	60	20.7612	0	3.83	92.4	3.27	0.853786	5.35	5.07	4.58	1.88	12.2	122.2	43.68	5.75	5678.08	89.8107	1.58171	-812.63	-960	-905	3.6435	301.056	2.12514	2.74355	3.07963	5804.73	5286.7	3631.43	35369.2	25209.8	17192	1701	969	561	1290	480	216
246	M	71	1.6	51	19.9219	0	1.57	26.4	0.59	0.375796	2.19	0.46	0.35	0.2	7.33	107.5	69.34	4.51	5741.93	1151.41	20.05	-876.15	-989	-955	5.82	251.43	2.21	2.53	2.8	5291.25	4570.03	2927.11	75512.1	54263.8	31414	1338	926	541	978	528	250
247	F	68	1.58	61	24.4352	0	2.32	101.6	2.02	0.87069	5.38	5.38	4.52	0.98	6.59	94.8	56.04	5.97	2831.01	23.2646	0.821776	-787.349	-946	-893	4.24167	185.877	2.42122	2.95754	2.92679	5256.69	3596.26	1347.7	16503.7	9504.14	4316.37	1155	546	236	755	237	98
248	M	85	1.68	62	21.9671	0	2.18	71.1	1.62	0.743119	2.86	2.86	1.61	0.52	4.47	63.4	54.3	4.79	2620.14	23.18	0.88	-749.47	-947	-878	5.68	160.09	2.43	2.84	2.93	4229.52	2131.28	678.85	11982.7	4031	1210.96	956	380	126	611	185	60
249	M	79	1.7	70	24.2215	0	2.63	73.9	2.04	0.775665	7.07	4.17	2.13	0.51	6.24	75.9	62.31	5.08	3411.16	25.2	0.74	-765.87	-945	-893	4.82	181.32	2.23	2.68	3.07	4970.72	3868.94	2043.52	18856.6	12049.4	5272.48	1056	592	273	777	333	123
250	M	64	1.73	63	21.0498	0	3.81	108.1	3.41	0.895013	8.93	8.73	6.01	1.91	8.66	95.1	57.49	5.93	5233.45	17.4344	0.333134	-831.443	-941	-911	4.00967	40.9582	4.13568	4.30915	4.22609	389.913	855.528	838.182	17212	15170.8	9761.03	34	62	53	10	13	9
251	M	80	1.72	58.5	19.7742	1	2.89	77.8	2.01	0.695502	5.12	3.84	1.61	0.45	7.28	93.6	48.98	5.06	5084.78	89.12	1.49	-802.71	-960	-912	7.14	204.31	2.35	2.79	3.15	822.01	850.89	2409.28	4396.95	1901.38	7.13	1025	597	41	692	283	4
252	M	65	1.8	62.5	19.2901	1	2.29	26.8	0.93	0.406114	2.86	0.77	0.49	0.3	1.7	17.2	72.97	5.64	6719.78	828.56	12.33	-861.82	-989	-945	4.95	336.11	2.32	2.69	2.87	8056.57	7262.94	5007.82	75768.5	52396.4	34985.5	1552	1021	668	1037	527	331
253	M	57	1.81	70	21.3669	1	3.58	73.6	2.69	0.751397	4.29	4.25	2.44	0.81	6.5	62.9	33.63	4.79	5225.07	112.01	2.14	-823.5	-968	-896	4.12	259.14	2.31	2.87	2.98	5616.44	4671.6	2978.82	4430.11	3330.56	2613.4	1227	722	453	833	317	179
254	M	68	1.75	63	20.5714	0	3.05	77.3	2.38	0.780328	5.01	4.48	2.36	0.93	6.02	67.3	46.51	5.87	4873.59	9.92	0.2	-791.8	-929	-881	5.02	284.82	2.29	2.64	2.83	6922.9	5581.48	3063.67	22224.6	15185.8	8229.53	1515	917	473	1048	510	249
255	M	59	1.7	55	19.0311	0	2.94	84	2.67	0.908163	6.25	5.98	4.17	1.63	8.8	96	42.2	4.95	4696.85	91.7	1.95	-832.67	-958	-915	3.43	301.72	2.22	2.47	2.61	5188.9	4062.88	2393.98	36234	23964.9	13815.6	1822	1067	569	1292	631	316
256	M	50	1.68	77	27.2817	1	1.56	43.5	1.45	0.929487	4.08	4.08	2.82	0.94	3.68	38.9	47.5	2.86	1553.32	0.16	0.01	-654.97	-846	-783	5.07	135.38	2.9	2.92	3.33	5166.96	2079.31	387.54	1738.52	435.12	95.66	626	227	41	315	108	18
257	M	83	1.72	63	21.2953	0	1.82	35.4	0.9	0.494505	1.86	0.92	0.48	0.22	2.54	33	53.09	3.26	4328.51	372.28	8.6	-839.55	-988	-934	5.04	257.65	2.18	2.69	2.87	5699.7	4425.29	2273.35	45663.9	25555.8	10814.2	1618	941	431	1172	479	209
258	M	60	1.65	88	32.3232	0	2.57	71.9	2.12	0.824903	7.34	6.94	3.31	0.76	8.8	103.1	45.56	5.05	5103.4	10.25	0.2	-813.03	-933	-891	3.34	205.65	2.94	3.47	3.73	7471.13	8527.53	5968.34	14703.5	10282.7	6386.36	742	664	452	298	164	100
259	F	47	1.55	60	24.974	0	2.08	72.8	1.75	0.841346	4.57	4.36	2.32	0.79	4.95	64.1	46.2	3.3	2348.38	6.25	0.27	-748.16	-928	-866	4.79	146.41	2.37	2.98	3.22	3493.78	2559.66	1421.87	7233.68	3226.84	1351.32	775	369	187	485	149	73
260	M	57	1.76	82	26.4721	1	4.23	97.5	3.44	0.813239	8.82	8.5	4.27	1.24	10.26	102.5	60.4	5.17	6330.36	180.787	2.85587	-839.616	-961	-926	3.15038	386.324	2.35865	2.97503	3.0522	12237.7	9645.72	7004.48	61183.9	40581.2	27624.5	2154	1095	668	1462	455	262
261	F	79	1.6	58	22.6562	0	1.65	76.3	1.29	0.781818	2.4	2.29	1.46	0.51	4.64	72.9	65.28	3.71	2211.49	11.69	0.53	-749.85	-939	-879	5.13	154.72	2.4	2.86	3.28	3602.73	1972.01	971.05	9893.97	4636.66	1602.62	895	383	126	574	198	51
262	M	88	1.6	69.7	27.2266	0	2.03	71	1.42	0.699507	3.29	2.75	1.08	0.44	4.12	65	52.74	4.54	4543.63	85.7	1.89	-826.28	-956	-918	4.18	217.09	2.46	2.83	3.19	6253.94	4913.36	2900.61	56940.5	29101.6	14553.7	970	679	336	609	319	133
263	M	71	1.6	45	17.5781	0	1.12	34.3	0.82	0.732143	2.03	1.58	0.62	0.19	13.37	185.9	57.83	9.9	2734.26	2.16	0.08	-722.34	-895	-830	5.68	152.02	2.2	2.53	2.76	2640.78	1879.23	921.33	4569.01	2225.25	981.76	783	486	249	551	276	123
264	M	74	1.7	84	29.0657	0	2.52	70	1.88	0.746032	3.54	3.51	1.79	0.56	4.81	60	57.62	4.81	3384.05	9.25	0.27	-750.48	-931	-868	5.74	263.32	2.64	2.85	2.92	9922.99	5258.29	2168.86	13955.4	6313.99	2451.52	1426	654	256	810	339	117
265	M	61	1.64	60	22.3081	0	3.52	109.3	3.12	0.886364	6.91	6.66	5.86	2.01	7.23	87.2	43.58	5.52	3768.32	2.50438	0.066459	-779.447	-921	-882	3.79478	49.6856	4.30283	4.36295	3.71102	1002.1	1316.87	805.025	4197.97	3758.89	2079.24	56	90	65	18	12	20
266	M	52	1.64	67	24.9108	1	3.7	96	2.99	0.808108	6.48	6.17	3.76	1.17	9.21	103	45.42	5.56	3199.05	24.3028	0.75969	-757.855	-944	-874	4.2677	201.168	2.24228	2.84639	3.12526	6020.68	4003.84	2197.33	15444.5	8974.44	4246.79	1193	516	222	856	248	89
267	M	77	1.72	62	20.9573	0	2.98	97	2.63	0.88255	5.55	5.13	3.92	1.53	5.83	72	46.75	4.79	2610.5	0.012634	0.000484	-678.376	-874	-825	5.33235	168.306	3.3682	3.71454	4.10694	7124.38	5607.89	2437.17	1278.35	670.759	184.918	606	423	166	216	114	26
268	M	77	1.75	93	30.3673	0	2.29	46.5	1.33	0.580786	3.3	1.75	0.78	0.28	4.81	56.8	66.08	5.31	6289.79	40.33	0.64	-813.34	-944	-901	5.01	266.14	3.17	3.43	3.91	8221.38	10041	8421.1	20244.7	13670.8	8574.31	651	726	536	243	197	105
269	F	60	1.59	51	20.1733	0	2.3	85.5	1.91	0.830435	4.25	4.25	2.67	0.83	4.78	64.3	59.28	3.48	3305.69	31.4376	0.951014	-764.368	-941	-868	5.2621	29.2162	3.708	3.90388	4.15927	424.278	394.621	608.139	3230.69	1757.45	992.612	32	38	47	9	7	8
270	M	85	1.76	58.5	18.8856	1	2.44	64.1	1.71	0.70082	2.27	2.27	1.64	0.79	4.3	53.4	50.42	4.31	3169.24	27.48	0.87	-782.67	-946	-883	4.45	165.39	2.91	3.36	3.48	6494	4904.75	2045.83	12126.6	9758.69	3872.64	618	423	164	310	142	51
271	M	75	1.78	80	25.2493	1	2.72	78.3	2.39	0.878676	4.01	3.89	3.05	1.31	7.15	80	41	6.13	5704.44	1092.67	19.15	-877.19	-988	-954	3.65	254.76	2.12	2.7	2.84	6635.88	6467.34	3781.02	74818.2	52048.7	31439.3	1435	942	507	1088	509	236
272	F	74	1.54	48	20.2395	0	1.56	75	1.28	0.820513	3.29	3.29	1.68	0.46	3.32	52	66.85	3.32	2416.03	8.56	0.35	-744.84	-932	-864	4.8	156.22	2.7	2.9	3.13	3746.41	1982.84	912.3	7762.45	3454.93	1322.33	726	365	137	376	161	57
273	M	71	1.73	71	23.7228	0	3.05	92.8	2.54	0.832787	5.09	5.09	3.31	1.07	7.11	88	50.71	4	2675.21	268.197	10.0253	-759.901	-1024	-927	4.22311	174.243	2.49504	3.00829	2.94533	4497.46	2963.89	1435.15	12102.3	7128.42	3913.94	929	412	235	574	183	107
274	M	67	1.65	62	22.7732	1	2.87	76	2.07	0.721254	5.71	3.39	1.69	0.69	9.5	118	67.41	5.89	4837.55	9.27	0.19	-826.13	-936	-902	4.5	286.12	2.21	2.51	2.6	7452.96	5706.18	3371.26	36167.2	26158.3	14971.2	1921	1064	598	1417	601	326
275	M	88	1.7	68	23.5294	1	1.83	28.5	0.72	0.393443	1.97	0.54	0.3	0.14	3.24	41.9	67.87	3.83	4348.92	467.11	10.74	-791.26	-989	-940	5.52	337.84	2.48	2.91	3.18	9333.22	7563.26	4006.96	40664.8	24091.9	12078.9	1599	982	490	1028	492	208
276	M	83	1.78	70	22.0932	0	2.98	66.4	1.87	0.627517	5.63	3.02	1.14	0.42	3.46	41.2	51	4.78	5240.11	332.59	6.35	-839.33	-977	-933	3.48	133.16	2.94	3.29	3.44	3103.76	4320.69	3103.51	35302.8	24842.5	18982.4	309	364	299	144	114	83
277	M	82	1.68	65	23.03	0	1.64	35.8	0.87	0.530488	2.59	1.09	0.42	0.18	4.64	62.5	51.36	4.6	4859.62	884.05	18.19	-865.21	-994	-954	5	234.53	2.27	2.79	3.2	5972.88	5355.78	3838.98	57906.8	40032.5	21698.5	1114	751	394	775	375	150
278	M	67	1.8	60	18.5185	1	3.42	54	1.97	0.576023	3.32	2.53	1.29	0.58	2.94	28	57.5	4.08	7184.94	2709.32	37.71	-888.63	-1025	-1012	3.84	341.22	2.32	2.57	2.69	7646.83	7342.99	5458.42	116231	79019.3	49500.3	1485	1196	754	1033	709	408
279	M	59	1.7	70	24.2215	1	2.82	60	1.92	0.680851	5.2	2.76	1.44	0.29	5.69	62.1	50.4	5.16	5264.1	190.33	3.62	-840.53	-966	-926	4.78	335.71	2.33	2.69	2.91	8527.94	6794.95	4059.84	45701.2	30960.6	17061.2	1863	1072	604	1223	573	299
280	F	82	1.6	57	22.2656	0	2.39	122.5	2.11	0.882845	3.62	3.62	3.54	1.53	8.29	128.9	58.72	8.84	2790.34	0.45197	0.016198	-760.992	-913	-871	4.72349	75.5373	3.07643	3.29485	3.6664	3339.61	3299.41	1145.75	4752.81	2596.56	1045.1	268	252	93	113	78	18
281	M	73	1.7	64.2	22.2145	0	2.46	77.1	2.13	0.865854	4.89	4.85	3.34	0.91	9.58	117.2	54.35	7.21	3290.77	27.77	0.84	-822.93	-947	-907	4.38	166.83	2.56	2.8	3.11	3666.26	3435.37	1491.18	17751	14284.2	6789.3	705	496	217	419	234	92
282	M	73	1.74	75	24.7721	1	2.79	79	2.34	0.83871	4.85	4.71	3.06	0.79	6.79	78	46.09	5.15	3901.79	0.09	0	-775.19	-896	-860	4.27	250.19	2.39	2.87	2.71	7813.86	5803.08	2553.98	19638.4	9983.67	4924.57	1309	739	370	840	352	201
283	M	84	1.7	65	22.4913	0	2.38	66.5	1.85	0.777311	6.35	6.35	1.93	0.52	4.67	56	40.59	4.68	3518.69	66.05	1.88	-761.33	-961	-891	5.09	215.95	2.64	3.09	3.29	8068.98	5820.44	2818.4	18762.4	9736.61	3586.54	1045	598	245	591	258	96
284	M	80	1.65	62.5	22.9568	1	2.08	72.9	1.73	0.831731	3.29	3.06	2.36	0.86	5.18	71.7	48.83	3.89	3638.48	11.97	0.33	-799.44	-937	-892	3.66	258	2.32	2.53	2.64	6497.88	4057.25	2577.71	21822.3	13815.1	6843.92	1499	844	466	985	495	269
285	F	71	1.55	33	13.7357	0	1.35	69.3	1.23	0.911111	2.58	2.58	2.5	0.89	3.41	52.3	54.56	3.46	2454.03	107.67	4.39	-832.03	-974	-924	3.45	125.04	2.08	2.48	2.7	2480.31	1684.6	722.36	22521.2	12671.6	4757.5	917	495	170	699	295	78
286	M	73	1.78	83	26.1962	0	2.48	73	2.27	0.915323	8.88	8.53	4.05	0.83	7.7	85	48.47	4.57	4032.02	10.75	0.27	-807.72	-937	-896	4.02	168.18	2.88	3.43	3.74	4817.66	5609.88	3719.02	15931.1	11406.4	7417.13	572	571	366	267	152	77
287	M	73	1.63	56	21.0772	0	2.37	66.7	1.61	0.679325	4.3	3.67	1.29	0.27	3.73	51.3	49.75	3.43	4715.88	396.15	8.4	-840.28	-999	-933	3.9	197.57	2.23	2.59	2.82	4969.41	4191.63	1972.49	29205.9	20139.4	10118.1	1268	708	345	907	382	169
288	M	76	1.58	50	20.0288	0	2.6	79	1.73	0.665385	4.76	4.3	1.02	0.37	4.79	71.4	48.98	5.48	3060.12	13.88	0.45	-792.26	-937	-887	5.15	134.28	2.93	3.38	3.61	2904.54	2951.78	1767.2	5374.06	3304.93	1683.13	491	439	243	241	129	66
289	M	73	1.69	70	24.5089	1	2.5	72	1.93	0.772	6.48	6.14	2.43	0.49	4.95	62.2	39.96	4.42	4775.28	124.58	2.61	-845.81	-962	-922	4.1	249.39	2.25	2.75	2.89	6446.08	5583.12	3261.88	41182.5	28679.2	15873	1497	876	482	1042	441	226
290	F	66	1.57	67	27.1816	0	1.81	77.8	1.56	0.861878	3.67	3.6	1.98	0.83	6.58	94.4	61.94	4.56	2145.7	1.53	0.07	-743.24	-907	-846	5.87	162.35	2.49	2.81	3.12	4908.99	2478.06	917.3	5172.36	2018.18	558.63	916	348	117	545	177	56
291	F	76	1.55	55	22.8928	0	1.34	47.3	0.8	0.597015	2.42	0.88	0.52	0.14	3.94	61.9	63.09	3.81	2853.23	1.53	0.05	-784.08	-920	-877	6.67	113.33	3.03	3.34	3.44	2638.34	2403.7	1671.56	7862.2	5655.18	3610.33	374	345	224	164	110	67
292	M	95	1.6	60	23.4375	0	1.59	57.4	1.1	0.691824	2.67	2.67	0.7	0.29	1.1	68.4	62.58	3.27	2346.44	13.91	0.59	-673.64	-936	-850	5.73	258.42	2.61	2.8	2.92	7446.59	4150.46	2113.68	8505.25	3317.85	1243.44	1158	610	278	701	327	146
293	M	65	1.68	60	21.2585	1	2.79	65	1.95	0.698925	3.35	2.8	1.41	0.51	3.51	40	46.49	4.31	4450.07	134.3	3.02	-838.74	-963	-922	3.83	151.47	2.93	3.15	3.45	3410.66	4203.94	3304.21	21065.4	13031	8144.53	379	483	347	171	173	93
294	M	55	1.69	41	14.3552	1	1.65	48	1.52	0.921212	4.94	4.94	3.68	1.25	4.29	47.3	69.79	5.17	4536.43	23.72	0.52	-811.82	-935	-892	3.06	165.16	2.93	3.15	3.51	3704.9	4114.44	3405.18	10168	6724.83	4663.43	511	514	396	239	174	116
295	M	72	1.65	53	19.4674	0	2.23	88.2	2.08	0.932735	5.17	5.11	3.53	1.39	6.33	88.8	52.53	4.88	3069.22	17.4271	0.567801	-729.958	-937	-872	5.00906	182.463	2.19115	2.70127	2.76099	3808.92	2881.18	1352.02	13330.2	7150.38	3419.49	1129	583	287	825	318	148
296	M	72	1.6	50	19.5312	0	2.25	71	1.69	0.751111	4.5	3.82	1.58	0.5	7.4	103	52.51	4.83	3083.83	25.69	0.83	-795.44	-947	-904	4.71	143.03	3.04	3.41	3.6	4040.95	3556.23	2338	12052	7677.62	4286.18	553	437	277	244	150	73
297	F	71	1.58	42	16.8242	0	1.83	67	1.3	0.710383	3.18	2.94	1.1	0.44	4.3	62.8	51.97	3.5	2480.64	17.58	0.71	-771.71	-944	-889	4.62	158.88	2.49	3.19	3.16	3094.82	2422.33	1220.31	14784.5	8164.56	3422.93	796	419	170	468	162	65
298	F	76	1.58	60	24.0346	0	2.33	90	1.6	0.686695	2	2	1.56	0.41	3.51	53	28.41	2.76	2968.75	41.94	1.41	-766.2	-955	-891	4.53	202.55	2.48	2.89	2.99	7087.73	4664.8	2081.27	15364.1	8381.1	3072.81	1070	524	227	670	267	101
299	M	70	1.8	65	20.0617	0	3.68	91.1	2.57	0.69837	4.12	3.44	2.48	0.71	5.57	67	63.12	6.5	4963.03	82.71	1.67	-818.45	-955	-912	4.03	327.8	2.25	2.41	2.52	7055.06	5406.93	3116.51	54626.1	27509.2	14025.7	1854	1237	644	1294	774	397
300	F	70	1.57	43.5	17.6478	0	2.02	100.4	1.96	0.970297	4.92	4.65	2.64	1.4	5.8	84.4	52.88	5	4593.66	345.856	7.52898	-848.317	-980	-936	2.65496	236.402	2.15035	2.6279	2.67789	4132.82	3554.84	2320.64	48876.2	32814.1	20076	1381	777	486	1041	423	234
301	M	70	1.65	66	24.2424	0	2.73	72.2	1.95	0.714286	3.5	3.37	1.66	0.57	8.58	107.4	72.55	7.7	5183.22	1282.64	24.75	-865.75	-1024	-972	3.81	234.32	2.09	2.5	2.7	5549.02	4871.21	2956.36	54899.4	36771.7	22211.6	1427	884	482	1089	526	248
302	M	79	1.67	53	19.0039	0	3.32	69.2	1.57	0.472892	2.96	1.59	0.86	0.46	2.11	30.4	47.8	5.34	7256.67	3869.27	53.32	-919.52	-1024	-1003	3.7	241	2.04	2.37	2.55	4042.37	4123.64	3020.45	139038	105508	68927.2	1218	973	613	964	645	341
303	M	69	1.68	73	25.8645	0	3.08	79.8	2.15	0.698052	5.55	5.11	1.93	0.45	4.82	60.6	44.6	4.92	4851.24	171.97	3.54	-827.63	-976	-917	3.67	338.19	2.42	2.78	2.95	11260.8	8828.59	4971.98	49262	24699.6	13521.5	1742	1073	553	1113	569	279
304	M	69	1.7	71	24.5675	0	3.62	84.1	2.42	0.668508	5.85	4.96	1.74	0.44	6.86	81.3	52.29	6.03	4374.74	32.19	0.74	-786.3	-945	-894	4.62	222.18	2.97	3.5	3.94	6756.39	7544.3	5235.15	12509.8	8936.26	6648.92	762	674	410	320	171	69
305	F	87	1.57	50	20.2848	1	1.66	97.7	1.16	0.698795	3.63	3.24	1.49	0.36	3.1	58.1	42.98	3.55	2199.84	43.77	1.99	-758.97	-964	-896	4.63	151.32	2.51	2.58	2.96	3513.19	1750.2	643.14	12446.4	4644.35	1374.2	860	322	93	529	181	51
306	F	58	1.68	54	19.1327	0	2.11	66	1.58	0.748815	2.94	2.94	1.74	0.45	3.92	51	56.74	3.15	3093.2	52.72	1.7	-810.86	-957	-908	4.4	142.35	2.4	2.72	3.09	2508.12	2047.01	1247.01	15980.3	11846	5543.03	552	402	207	349	194	77
307	F	82	1.5	65	28.8889	0	1.12	72.4	0.93	0.830357	1.54	1.54	1.17	0.55	1.87	33.9	56.48	2.74	1861.45	1.42	0.08	-701.88	-909	-829	5.78	107.94	3.52	3.84	4.13	5888.87	3774.91	979.25	2091.69	1069.91	74.98	501	324	66	134	86	15
308	M	74	1.74	59.5	19.6525	1	3.31	76.3	2.23	0.673716	3.38	3.38	2.18	0.4	6.12	71.2	68.69	7.04	6014.68	1520	25.27	-864.68	-1024	-979	2.46	252.45	2.1	2.53	2.83	5647.46	4528.46	2896.09	60256.4	43193	25853	1432	914	515	1083	486	209
309	M	80	1.69	59	20.6575	0	2.13	63	1.6	0.751174	5.19	3.13	1.31	0.33	3.51	46	60.1	4.15	5047.27	577.74	11.45	-858.33	-994	-943	3.72	291.15	2.22	2.61	2.67	7249.44	6028.9	3806.39	58200.5	37266.2	20548.1	1663	1019	545	1221	584	322
310	F	76	1.68	105	37.2024	0	1.73	73.2	1.6	0.924855	5.06	5.06	3.16	1.07	3.83	51.9	47.2	3.25	3295.68	10.33	0.31	-770.57	-933	-875	4.15	167.43	3.22	3.79	3.97	6726.49	5243.28	2522.29	10520.2	8019.41	3099.49	712	503	221	255	111	57
311	F	65	1.59	57	22.5466	0	2.22	93.6	1.97	0.887387	5.26	5.26	2.82	1.13	7.8	108.6	59.37	3.63	2537.07	9.6996	0.382314	-749.927	-937	-880	4.96146	196.9	2.46576	2.86211	2.72672	4287.17	2851.14	1235.46	9779.34	5010.21	1934.73	1116	558	265	709	270	131
312	F	79	1.67	67	24.0238	0	1.75	70.7	1.4	0.8	3.99	3.99	1.68	0.32	3.73	53.7	53.01	3.65	2840.19	281.87	9.92	-783.46	-1024	-926	4.93	169.13	2.24	2.63	2.88	4185.24	2866.54	1388.92	12403.5	6587.52	2725.91	1034	551	252	754	287	121
313	F	57	1.58	60	24.0346	0	1.67	71.2	1.61	0.964072	2.84	2.84	2.61	1.39	8.91	119	62.31	3.63	2765.84	4.6	0.17	-784.88	-926	-879	4.74	189.86	2.42	2.85	2.93	5339.15	3202.1	1752.98	12915	6207.97	2970.5	1033	507	245	642	237	116
314	M	73	1.75	89	29.0612	1	2.63	74.3	2.23	0.847909	6.33	5.84	2.65	0.65	6.53	74.3	55.38	5.28	4329.01	15.37	0.35	-797.91	-937	-892	3.88	182.96	3.14	3.62	3.94	6246.39	7066.71	5349.33	10110.3	7677.58	5115.86	520	521	358	186	107	54
315	M	70	1.6	55	21.0772	0	1.16	22.6	0.62	0.534483	1.24	0.68	0.4	0.25	1.8	22.2	69.34	4.57	6218.89	3069.43	49.36	-911.67	-1024	-1020	4.01	228.94	2.14	2.51	2.74	3790.91	3430.8	2447.7	122261	88937.6	64438.2	1131	838	495	851	492	241
316	M	80	1.58	52.5	21.0303	0	1.49	35.4	0.66	0.442953	1.65	0.63	0.32	0.16	5.89	99.3	51.24	3.62	3980.52	381.28	9.58	-849.6	-988	-939	5.08	175.48	2.15	2.61	2.91	3080.04	2643.91	1873.4	40585.4	22833.9	10794	993	601	313	728	316	139
317	F	73	1.62	54	20.5761	0	1.73	71	1.44	0.83237	2.6	2.57	1.73	0.67	5.27	74.9	48.62	4.1	2305.88	0.21	0.01	-716.75	-884	-836	5.6	133.54	3.24	3.56	3.72	3858.67	2908.42	1240.67	1408.59	944.53	400	539	350	156	189	103	39
318	M	77	1.7	55	19.0311	0	1.93	27.5	0.75	0.388601	1.69	0.59	0.36	0.21	2.51	31.1	60.14	4.03	5808.6	1172.28	20.18	-865.04	-1002	-958	4.62	325.24	2.32	2.68	2.9	6374.46	5377.74	2899	76722.2	55450.1	32057.3	1611	975	501	1071	499	222
319	F	84	1.62	60	22.8624	0	1.05	56	0.85	0.809524	1.4	1.4	0.96	0.42	2.68	44	60.8	3.5	3117.87	16.39	0.53	-778.74	-942	-891	4.62	145.36	3.09	3.45	3.64	4262.65	3612.09	2285.75	11406.4	6649.36	2977.54	570	433	241	263	119	71
320	F	49	1.55	64	26.6389	0	1.29	38.3	0.89	0.689922	1.99	1.14	0.68	0.22	4.05	53.4	58.77	2.88	2497.11	10.51	0.42	-760.22	-935	-870	5.98	177.38	2.44	2.99	3.1	5165.79	3541.88	1737.93	8016.77	3740.68	1361.94	999	494	224	648	209	97
321	F	58	1.55	63	26.2227	0	2.45	93.3	2	0.816327	4.17	4.15	2.83	0.82	4.85	67	46.56	4.2	2647.19	301.81	11.4	-807.45	-1024	-936	4.86	125.57	2.37	3.1	3.12	4328.14	3303.6	1536.81	13079.9	6583.93	2872.04	709	342	163	471	132	65
322	F	64	1.58	53	21.2306	0	1.37	64	1.17	0.854015	3.09	3.02	1.44	0.56	1.43	21	55.94	3.03	2613.7	3.16	0.12	-794.52	-929	-888	4.76	191.05	2.23	2.75	2.72	4413.65	2403.02	943.4	21129	7987.31	3294.98	1220	507	198	854	257	99
323	F	71	1.56	57.5	23.6275	0	2.43	116.2	2.14	0.880658	6.33	6.33	5.14	0.89	7.86	118.4	53.3	5.36	3667.09	6.16183	0.168031	-797.78	-928	-897	2.69191	41.1807	4.43559	4.31083	4.31876	1047.5	1066.77	808.134	12757.7	12672.7	6097.52	59	76	57	14	19	12
324	M	85	1.6	55	21.4844	0	1.49	38.2	0.75	0.503356	1.49	0.85	0.45	0.17	4.52	72.9	80.51	4.62	5565.11	1153.45	20.73	-887.43	-992	-956	4.84	251.37	2	2.41	2.66	3748.08	4165.43	3122.73	81383.4	53561.6	33243.7	1470	1036	618	1187	667	316
325	F	77	1.59	55	21.7555	0	1.95	73.1	1.26	0.646154	2.73	2.13	0.87	0.31	4.6	71.5	46.52	3.87	3199.83	74.89	2.34	-832.51	-960	-916	4.88	113.35	2.81	3.21	3.36	2561.77	2455.67	1519.28	19041.3	9960.31	4802.11	437	398	261	230	134	70
326	M	69	1.68	75	26.5731	0	2.02	56.6	1.57	0.777228	3.71	3.71	2.01	0.48	6.6	80.9	52.76	5.32	4973.44	811.84	16.32	-843.55	-1024	-953	3.41	263.51	2.52	2.97	3.19	10989.5	8493.05	4957.68	32924.8	23947.5	14469.2	1263	712	386	744	290	144
327	M	51	1.6	52.5	20.5078	0	3.19	68.3	2.19	0.68652	5.99	3.01	1.63	0.43	5.59	61.3	38.04	5.14	4689.26	981.13	20.92	-854.19	-997	-958	3.98	337.97	2.46	2.68	2.84	5645.48	5148.01	3060.11	61628.5	42076.9	23938.2	1467	1062	609	929	594	319
328	M	62	1.7	61	21.1073	1	2.87	67.8	2.08	0.724739	4.26	3.91	1.91	0.6	5.35	60.5	52.47	5.74	4578.64	28.69	0.63	-759.42	-939	-869	5.21	266.29	3.05	3.54	3.8	7915	7186.19	4818.33	8370.27	7339.83	5712.86	978	751	489	366	223	135
329	F	49	1.52	60	25.9695	0	2.44	98.9	2.18	0.893443	5.9	5.72	4.25	1.3	5.34	72.7	39.12	3.67	2748.64	279.026	10.1515	-797.765	-1024	-930	3.77408	193.368	2.50776	2.86225	2.96024	6059.79	3803.38	1807.4	11812.5	6480.28	2901.35	1010	502	231	612	236	107
330	F	84	1.55	49	20.3954	0	1.18	78	0.98	0.830508	1.88	1.88	1.48	0.45	3.03	55	59.71	3.44	1881.35	2.86	0.15	-710.06	-922	-860	4.55	151.79	2.68	3.06	2.85	4222.15	1822.86	701.35	5865.67	2251.95	785.73	757	275	97	411	120	51
331	M	73	1.68	69	24.4473	0	1.65	53.4	1.43	0.866667	5.2	4.66	1.88	0.59	6.55	82.4	55.84	3.98	3737.28	0.42	0.01	-745.13	-892	-842	4.77	286.17	2.53	2.89	3.14	8528.74	5932.18	3019.51	9849.9	6176.68	3035.22	1530	842	379	914	384	160
332	M	67	1.72	58	19.6052	0	2.85	73.7	2.23	0.782456	4.21	4.01	2.21	0.72	5.61	63.8	35.73	3.7	4955.89	29.94	0.6	-824.37	-943	-903	2.95	257.3	2.16	2.78	3.03	6250.74	4950.33	3311.22	30378.9	20872.4	11681.6	1588	863	476	1182	408	196
333	M	76	1.5	50	22.2222	1	2.17	55	1.21	0.557604	2.95	1.59	0.65	0.24	4.27	64	63.65	4.94	3595.42	207.55	5.77	-796.25	-990	-912	5.82	159.37	2.99	3.38	3.67	4720.78	4895.79	3216.29	21002.6	9664.66	4570.14	581	522	323	255	161	75
334	F	67	1.63	36	13.5496	0	1.66	67.4	1.49	0.89759	2.79	2.69	1.94	1.43	6.22	83.9	66	4.38	4163.68	220.17	5.29	-868.42	-966	-935	2.24	144.89	2.22	2.63	3.08	2289.87	2054.32	1366.34	41998.6	30509.4	16931.7	636	492	254	452	248	73
335	M	70	1.65	50	18.3655	0	2.16	78.4	1.92	0.888889	3.59	3.33	2.75	1.22	5.66	77.3	42.94	4.31	2924.78	8.64	0.3	-737.97	-927	-863	5.14	228.9	2.43	2.63	2.62	5167.89	3150.09	1319.76	7628.19	3507.15	1350.13	1246	583	245	810	340	146
336	M	72	1.68	54	19.1327	1	2.23	49.4	1.31	0.587444	2.51	1.75	0.74	0.23	5.33	67.8	61.94	5.19	4249.35	171.62	4.04	-822.07	-977	-917	5.72	169.22	2.93	3.2	3.61	3251.42	3485.9	2802.84	22958.8	16495.8	11054.7	509	529	394	256	184	94
337	F	58	1.6	55	21.0772	0	1.68	71.4	1.6	0.952381	3.02	3.02	2.32	1.16	6.72	90.3	57.2	4.04	3567.85	8.87	0.25	-805.72	-932	-887	3.98	202.15	2.19	2.65	2.93	5718.11	4133.78	1913.88	26427.2	13808	7927.59	1260	634	265	942	350	125
338	M	74	1.7	60	20.7612	0	1.96	64.9	1.61	0.821429	3.87	3.17	1.38	0.59	7.42	99.1	66.65	4.74	4485.28	14.27	0.32	-790.83	-929	-880	5.67	159.7	2.89	3.26	3.48	3513.44	3463.15	2979.3	9919.26	7118.86	4185.02	490	477	357	241	151	101
339	F	57	1.58	55	22.0317	0	2.59	98.2	2.22	0.857143	5.01	5.01	4.28	1.13	6.2	82.8	46.05	4.32	2970.56	18.9332	0.637362	-718.523	-899	-830	7.05289	32.0222	3.9867	4.1996	4.26496	785.779	586.983	416.35	2908.88	1127.97	446.646	53	55	38	16	12	7
340	F	55	1.51	51	22.3674	0	2.36	98	2	0.847458	5.63	5.25	2.9	0.96	5.65	80.5	48.1	4.18	3728.45	162.257	4.35185	-817.153	-996	-914	4.55462	36.7187	4.30539	3.82828	4.13204	417.084	731.112	502.33	5145.42	5040.61	2928.87	33	73	53	8	17	6
341	M	70	1.74	68	22.46	1	3.27	89.5	2.71	0.828746	4.67	4.66	3.82	1.23	7.11	80.3	52.5	5.56	5615.49	523.138	9.31598	-858.813	-980	-942	2.83727	180.715	1.76401	2.28989	2.6568	4423.31	5439.78	4564.27	79841.1	53338.9	34977.8	1015	790	467	893	575	263
342	F	67	1.65	56.5	20.753	0	2.6	103.9	2.38	0.915385	5.93	5.4	3.63	1.2	6.35	83.9	47.28	4.81	4298.05	189.22	4.4	-842.29	-973	-926	3.07	200.74	2.15	2.64	2.76	4860.69	3117.09	2269.57	47220.4	28074	17315.9	1217	633	340	892	325	164
343	M	80	1.58	60	24.0346	1	2.17	86.3	1.74	0.801843	4.38	4.01	1.88	0.58	5.72	90.7	58.64	4.3	2876.35	15.54	0.54	-766.23	-939	-875	5	234.45	2.52	2.75	2.85	7433.79	4148.2	2004.71	14843.2	5675.59	2472.44	1364	624	252	821	352	134
344	M	55	1.75	65	21.2245	0	3.63	85	2.99	0.823691	9.16	8.01	4.77	1.09	8.09	81	44.81	6.16	6333.9	105.74	1.67	-842.25	-957	-915	3.47	381.96	2.26	2.54	2.69	8773.61	7209.5	5087.95	49155	34391.2	21986.8	2329	1391	857	1637	782	479
345	M	73	1.7	70	23.6614	0	2.42	63	1.74	0.719008	4.77	2.72	1.13	0.13	4.82	59	47.9	4.82	6731.1	166.02	2.47	-834.57	-959	-922	3.67	281.67	3.03	3.44	3.71	7930.96	8577.36	7154.38	36007.6	30581.1	22632.8	849	770	590	306	196	141
346	M	65	1.72	75	25.3515	0	3.19	86.1	2.68	0.840125	5.05	5.05	3.31	0.97	9	100.1	53.3	5.46	3258.63	7.34985	0.225551	-755.865	-926	-871	5.34845	160.682	2.07262	2.68393	2.9283	5279.1	4560.43	2452.46	13265.4	7757.39	3908.52	1153	572	295	904	298	129
347	F	41	1.52	46.5	20.1264	0	1.9	77.7	1.89	0.994737	4.27	4.27	3.79	2.23	6.36	81.8	58.32	3.58	2612.55	5.92	0.23	-780.16	-929	-878	4.59	197.38	2.28	2.71	3.13	3792.76	2403.58	1361.77	11770.8	5988.24	2772.33	1267	589	259	860	296	111
348	M	70	1.65	75	27.5482	0	1.25	40	1.06	0.848	3.04	2.64	1.05	0.42	5.22	70.66	41.82	2.2	4056.57	601.9	14.84	-826.46	-1024	-949	3.34	219.35	2.26	2.66	2.86	6132.08	4619.15	2522.95	27478.6	17077	8137	1367	735	364	959	386	170
349	M	88	1.58	58	23.2335	0	1.75	68.8	1.45	0.828571	3.93	3.93	2.49	0.77	8.89	134.2	51.66	8.84	1912.52	0.23	0.01	-686.17	-885	-835	5.44	96.74	3.39	3.77	3.83	4935.17	3371.8	1263.5	778.38	525.59	221.5	374	267	95	121	65	27
350	M	72	1.76	62	20.0155	1	3.26	74.3	2.23	0.684049	4.65	3.72	2.09	0.31	7.13	81.1	58.21	5.88	3378.61	23.3	0.69	-757.32	-942	-881	5.55	225.34	2.33	2.57	2.73	4812.8	3191.33	1600.64	16318	9595.99	3795.89	1227	723	304	814	420	163
351	M	60	1.65	47	17.2635	1	1.66	23.5	0.69	0.415663	1.46	0.8	0.34	0.25	2.75	37.5	60.84	4.39	5904.1	1178.29	19.65	-842.43	-1010	-968	5.6	85.63	3.09	3.21	3.42	1148.72	1452.6	4085.02	75780.8	52055.6	30203.1	619	649	560	295	262	188
352	F	54	1.61	75	28.9341	0	1.89	51.7	1.27	0.671958	2.59	2.27	0.97	0.29	5.92	75.1	60.04	3.82	2088.67	1.34	0.06	-723.46	-900	-834	6.78	129.83	3.51	4.11	4.3	6113.77	4609.11	2042.08	1710.75	890.99	246.06	545	330	121	144	53	20
353	M	60	1.68	57	20.1956	1	3.97	107.1	3.27	0.823678	9.38	9.17	5.43	1.07	6.38	72.4	39.1	6.19	5894.85	20.7845	0.352587	-832.609	-940	-909	3.62132	70.9643	4.5379	4.30499	3.80428	1340.65	1538.05	1259.97	760.553	793.827	720.149	59	103	96	12	16	26
354	M	72	1.8	76	23.4568	0	2.94	59.9	1.93	0.656463	3.71	2.8	1.45	0.48	5.58	59.7	41	5.28	4315.42	74.97	1.74	-765.35	-961	-894	5.82	222.4	2.78	3.21	3.54	7433.33	7919.08	4071.77	23080	13355.9	6711.57	781	539	263	414	195	91
355	M	59	1.69	90	31.5115	1	2.23	55.9	1.72	0.7713	3.12	2.64	1.31	0.51	6.75	76.1	60.07	5.77	6301.86	588.16	9.33	-842.89	-986	-938	4.77	323.53	2.42	2.72	2.97	11081.5	8464.1	5579.11	61089.1	43582.1	27214.3	1510	1094	574	1001	588	260
356	F	79	1.6	63	24.6094	0	1.63	79.5	1.46	0.895706	4.16	4.11	1.86	0.57	4.39	66	64.48	3.49	2127.84	23.76	1.12	-739.44	-951	-872	5.56	104.55	2.28	2.68	3.22	3029.92	1770.11	696.17	7990.31	3637.15	943.21	697	294	89	495	159	41
357	F	77	1.65	53	19.4674	0	1.94	101.7	1.7	0.876289	3.06	3.06	2.26	0.97	3.66	58	46.13	3.53	3943.52	202.3	5.12994	-827.237	-997	-922	4.0755	33.647	4.17291	4.15259	4.27067	553.229	901.416	634.037	6329.28	7294.93	3998.83	41	69	48	10	14	8
358	M	67	1.78	76	23.9869	1	2.54	52.9	1.73	0.681102	3.2	2.9	1.44	0.42	4.88	51.6	61.97	4.91	5070.89	441.9	8.71	-845.87	-984	-937	4.21	283.51	2.33	2.58	2.75	7475.42	5237.09	3207.81	53063.4	35206.5	18992.6	1527	918	483	1027	522	255
359	F	59	1.6	69	26.9531	0	2.49	98.7	2.26	0.907631	5.19	5.19	4.16	1.66	6.38	84.5	48	4.39	3255.6	2.87265	0.088237	-767.193	-917	-868	4.25249	226.046	2.50514	3.18074	3.23862	6742.06	5250.07	2779.22	13005.5	7890.52	4255.59	1225	569	307	731	210	124
360	F	75	1.67	58	20.7967	0	1.73	67.2	1.41	0.815029	3.48	3.27	1.32	0.25	6.19	86.2	44.26	4.87	3552.14	15.86	0.45	-790.51	-939	-892	4.8	228	2.43	2.93	3.12	6336.7	4659.86	2335.55	17524	11629.1	5381.08	1211	650	307	757	300	137
361	F	59	1.61	62	23.9188	0	2.49	87	2.01	0.807229	5.22	5	2.07	0.81	7.23	95	57.65	4.75	2315.39	0.29	0.01	-713.81	-883	-824	5.72	187.82	2.52	2.86	2.81	4764.68	2330.97	912.52	4343.36	1862.21	544.21	1045	386	136	643	193	73
362	M	80	1.73	61.5	20.5486	0	2.01	80	1.79	0.890547	5.33	4.11	2.73	0.6	4.73	69	56.35	4.22	2855.19	8.66396	0.303446	-762.227	-935	-880	4.81763	200.471	2.39463	2.94278	3.14521	6267.78	4868.66	2206.66	15846.1	8433.62	3973.05	1109	584	262	732	274	108
363	M	75	1.65	75	27.5482	0	2.43	70.9	1.76	0.72428	4.28	3.65	1.63	0.48	7.75	103.6	35.74	5.75	5043.06	26.17	0.52	-811.84	-942	-899	3.35	213.7	2.87	3.33	3.76	5930.94	6394.94	4436.48	21033.8	14699.2	10502.2	726	678	444	367	199	106
364	F	66	1.5	46	20.4444	0	1.54	75.2	1.3	0.844156	2.19	2.19	1.56	0.77	4.69	73.3	62.74	4.3	1575.05	0.16	0.01	-704.52	-881	-824	5.96	83.3	3.23	3.59	3.81	3569.81	2173.14	826.64	944.56	458.36	136.22	406	235	93	135	70	20
365	M	65	1.71	68	23.255	1	3.83	83.7	2.68	0.699739	6.16	5.14	2.53	0.62	4.05	43.8	63.12	4.18	5904.61	1297.51	21.97	-876.46	-1011	-961	2.96	288.62	2.2	2.57	2.83	7244.98	5438.91	3978.1	80911.2	57593.8	31979.2	1650	1002	577	1223	548	275
366	M	77	1.67	63	22.5896	0	3.02	79.6	2.02	0.668874	4.67	4.3	1.62	0.41	4.64	60.8	46.58	5.43	4405.91	78.72	1.79	-820	-957	-912	3.46	142.97	3	3.13	3.46	3768.38	3776.4	3232.75	32343.6	23553.3	15530.5	477	458	357	218	162	101
367	M	85	1.72	80	27.0416	0	2.58	77.3	1.96	0.75969	4.14	4.07	2.34	0.51	4.9	63.9	49.22	4.98	4165.47	82.76	1.99	-816.14	-959	-913	3.91	178.54	2.98	3.14	3.69	5061.42	4954.77	3856.73	21832.7	14222.4	8248.66	633	607	407	274	234	97
368	M	74	1.69	49	17.1563	0	2.82	65.8	1.77	0.62766	3.34	2.91	1.14	0.29	8.63	108	59.75	7.23	4298.08	215.21	5.01	-834.77	-983	-923	4.4	181.75	1.85	2.32	2.68	3503.77	2970.92	1869.82	44199.6	25345.6	16739.9	1055	705	364	852	454	207
369	M	59	1.72	74	25.0135	0	2.66	64	2.08	0.781955	4.96	4.86	2.63	0.63	6.76	72.6	47.8	4.91	3073.28	9.8	0.32	-758.15	-932	-874	4.96	232.67	2.44	2.93	3.06	6459.77	3799.22	1877.38	13017.6	5538.34	2004.52	1267	549	197	800	271	103
370	F	61	1.6	63	24.6094	0	2.6	116.3	2.37	0.911538	9.31	9.31	5.11	1.95	7.43	105.9	45.27	4.17	3341.71	624.827	19.1942	-770.051	-909	-863	4.45181	37.4346	4.48014	4.81661	4.24779	669.38	752.717	527.331	1289.92	916.171	475.336	43	52	44	9	6	9
371	M	77	1.7	77	26.6436	0	2.56	74.2	1.94	0.757812	4.67	4.46	1.78	0.56	6.79	86.6	55.58	4.92	4929.91	862.2	17.49	-845.26	-1024	-957	4.04	258.09	2.39	2.86	3.01	10314.3	6984.57	4166.47	35875.3	23022.2	11456.3	1422	828	438	929	378	188
372	F	56	1.65	65	23.8751	0	2.89	96.2	2.47	0.854671	4.5	3.82	3.07	1	7.61	93.8	41.91	4.91	3759.11	385.816	10.2635	-806.026	-1024	-932	3.64772	231.995	2.36049	2.83691	3.06602	5739.04	3938.37	1973.84	16372.1	9719.01	5056.34	1399	664	312	924	291	120
373	F	53	1.58	51	20.4294	0	2.7	96	2.29	0.848148	5.63	5.63	4.37	1.11	6.79	88	40.6	4.04	1953.03	0.006866	0.000352	-652.445	-863	-804	4.98123	107.411	3.08553	3.61606	3.39278	3126.92	2573.11	1090.05	840.454	405.807	133.896	514	296	136	205	88	55
374	M	70	1.69	47	16.456	1	1.98	46.3	1.28	0.646465	2.37	1.89	0.91	0.34	3.16	38.8	54.76	4.42	4172.07	442.47	10.61	-861.35	-984	-942	4.33	232.69	2.14	2.42	2.66	3633.46	2843.53	1613.54	48159.3	32089	17544.7	1522	898	440	1099	532	246
375	F	59	1.63	45	16.937	0	1.87	69.8	1.7	0.909091	4.15	4.15	2.94	1.13	4.92	62.7	65.89	3.99	3401.93	4.71	0.14	-800.8	-926	-882	4.11	182.75	2.28	2.83	2.86	4285.47	2712.76	1495.49	14264.3	9014.29	4138.67	1047	553	268	718	259	119
376	F	58	1.56	56	23.0112	0	2.34	68.1	1.46	0.623932	2.76	2.04	0.98	0.35	4.83	66.8	48.36	3.48	3749.96	147.62	3.94	-843.11	-965	-928	5.22	245.01	2.3	2.63	2.67	5930.37	4719.39	2443.79	38293.4	25291.8	13138.5	1480	851	476	1033	464	249
377	M	59	1.62	70	26.6728	1	2.27	39.2	1.13	0.497797	2.86	1.14	0.56	0.23	5.38	64.2	55.84	5.02	6051.73	1191.55	19.69	-881.32	-991	-955	4.28	229.53	2.27	2.75	3.17	5386.59	4930.33	3438.92	77637.5	56741.6	32260.5	846	716	370	596	354	128
378	M	65	1.78	75	23.6713	1	3.47	91.3	3.09	0.89049	6.93	6.93	4.81	1.47	16.67	171.8	63.44	6.25	5231.97	37.9188	0.724752	-753.621	-943	-877	4.9345	266.587	2.26638	2.89284	3.13328	5194.56	5313.17	4015.21	23429.3	14886.4	9019.21	1132	802	535	791	380	199
379	M	75	1.63	57	21.4536	1	2.28	74	1.76	0.77193	2.97	2.54	1.46	0.66	4.45	61	51.51	6.15	5629.32	289.72	5.15	-858.57	-968	-933	4.63	175.31	2.86	3.12	3.31	4002.47	5608.13	4407.03	37034.7	28376.5	18220.3	459	554	458	226	217	133
380	F	67	1.61	68	26.2336	0	2.49	99.6	2.08	0.835341	4.58	4.16	2.18	0.76	6.61	92.5	56.48	5.31	3966.82	733.295	18.4857	-829.618	-1024	-960	3.7441	200.001	2.14915	2.82889	3.04035	5797.77	5304.17	2874.12	30773.2	20092.9	11765.3	1155	642	326	870	282	125
381	F	70	1.58	77	30.8444	0	1.84	78.6	1.51	0.820652	4.36	4.36	2.15	0.56	6.12	89.7	51.73	3.6	2761.77	1.52	0.06	-782.35	-910	-867	5.38	202.87	2.74	2.98	3.09	7680.35	4771.26	2369.18	123.31	31.33	26.66	1032	518	260	544	234	121
382	M	69	1.65	67	24.6097	1	2.4	77.5	2.03	0.845833	3.82	3.82	3.16	0.88	7.06	90.9	50.71	4.78	3497.5	35.44	1.01	-763.11	-950	-878	5.35	209.58	2.46	2.98	2.95	7089.95	5744.57	2945.33	17985.8	7851.57	3643.86	971	598	342	625	289	162
383	M	74	1.55	53.1	22.102	1	1.99	43.3	0.97	0.487437	2.76	0.98	0.43	0.15	4.81	70.4	56.8	3.64	5435.31	1033.52	19.01	-876.74	-990	-954	4.3	242.8	2.27	2.68	2.93	5703.19	4217.17	2471.22	68991.6	49751.7	27955.2	1167	767	409	792	377	157
384	M	48	1.65	74	27.1809	0	2.87	70	2.42	0.843206	6.16	5.76	3.68	1.12	7.3	75	43.84	4.1	3950.58	0.53	0.01	-797.39	-917	-877	3.88	263.2	2.51	2.8	3.09	8910.3	6419.12	3485.28	30210.8	15904.9	7002.14	1353	757	347	813	354	149
385	M	60	1.8	75	23.1481	0	3.4	79.7	2.8	0.823529	4.93	4.83	3.65	1.32	4.75	47.5	53.01	7.21	3759.47	134.71	3.58	-823.1	-966	-924	4.3	196.56	2.24	2.82	2.92	5646.81	4158.87	1705.56	41617	20298.8	8122.11	1090	578	216	772	288	90
386	F	74	1.62	72.5	27.6254	0	1.73	75.2	1.53	0.884393	4.41	4.41	3.54	0.58	4.74	67.1	47.2	3.33	3457.25	29.63	0.86	-818.61	-948	-903	3.84	120.71	3.1	3.58	3.99	4458.39	5064.72	2951.59	15212.2	10455.4	6267.28	407	386	232	166	81	34
387	M	69	1.65	70	25.7117	0	2.71	85	2.24	0.826568	6.36	6.26	2.69	0.95	6.06	77	51.09	4.97	4737.8	16.8341	0.355314	-808.526	-940	-904	3.87544	320.989	2.27356	2.83978	2.98484	8281.06	7080.03	3908.65	38222	23969.9	14388.6	2001	988	552	1411	477	267
388	M	58	1.73	69	23.0546	1	2.77	79.2	2.63	0.949458	5.09	5.09	3.78	1.96	8.56	90.1	50.56	5.25	2987.69	234.03	7.83	-767.53	-1024	-915	4.05	213.18	2.51	2.9	2.95	6364.21	4088.36	1863.6	10084.1	5675.02	2691.25	1139	570	279	691	275	140
389	M	69	1.68	66	23.3844	0	3.82	81.6	2.37	0.620419	5.4	3.43	1.59	0.45	8.1	95.2	52.36	6.15	5843.84	599.23	10.25	-843.06	-1002	-939	5.57	115.88	2.9	3.03	3.05	1855.99	2715.87	2590.97	20120.2	15979.4	11769.9	204	280	302	105	121	119
390	F	66	1.66	52	18.8707	0	1.9	73.7	1.7	0.894737	5.82	5.67	2.46	0.91	6.64	87.3	59.8	4.42	3039.5	10.98	0.36	-772.41	-933	-873	4.14	178.79	2.79	3.35	3.47	6986.14	5429.6	2710.55	9467.14	6590.38	3733.04	837	505	265	392	171	82
391	M	44	1.8	82	25.3086	1	5.31	81.2	3.3	0.621469	6.09	4.35	2.3	0.86	10.01	88.9	36.3	7.51	6213.4	503.73	8.11	-841.69	-981	-936	4.14	316.08	2.29	2.7	2.83	9240.68	7755.37	4444.44	61626.4	41169.6	23163.7	1668	1054	558	1129	547	257
392	M	71	1.67	76	27.2509	1	2.13	62.7	1.65	0.774648	4.26	4.14	1.48	0.51	5.26	67.3	57.43	3.61	4349.13	453.04	10.42	-845	-994	-940	5.08	238.99	2.3	2.81	2.93	6898.65	5279.18	2855.12	40155.9	23161.8	10677.1	1354	797	400	952	389	195
393	F	61	1.6	52.5	20.5078	0	1.61	79.6	1.47	0.913043	3.55	3.49	2.43	0.7	4.96	74.7	52.53	2.93	1849.15	0.01	0	-686.22	-875	-819	5.1	179.12	2.36	2.55	2.41	3940.66	1989.62	597.78	5096.64	1538.09	567.54	1025	450	136	668	273	94
394	M	65	1.6	63	24.6094	0	2.86	94.5	2.68	0.937063	7.74	7.74	5.35	2.12	6.77	81	51.55	5.29	4836.42	443.645	9.173	-849.224	-1011	-938	3.17257	40.115	4.02772	4.38752	4.50976	851.054	837.844	691.374	16289.9	15460.8	9528.67	50	58	45	15	10	5
395	F	89	1.55	45	18.7305	0	1.27	105	1.13	0.889764	2.53	2.53	1.75	0.47	3.32	65	44.27	2.78	2800.41	65.855	2.35162	-785.656	-963	-910	3.87388	155.023	2.50449	2.92827	3.24209	2752.61	1928.39	778.56	17539.2	9992.65	4523.01	810	427	161	481	183	58
396	M	74	1.75	49	16	0	2.08	61	1.57	0.754808	2.52	2.52	1.8	0.56	3.69	47	57.87	4.6	3674.25	88.52	2.41	-816.75	-965	-910	4.69	186.78	2.69	3.23	3.52	6433.06	5969.9	4059.85	20879.8	14718.5	10094.1	871	640	387	471	231	97
397	M	70	1.7	60	20.7612	1	2.79	77.3	2.22	0.795699	4.05	3.92	2.71	0.78	5.84	69.3	56.31	4.46	4046.01	27.18	0.67	-816.24	-946	-910	3.56	125.73	3.03	3.37	3.43	2944.52	3276.23	2363.71	16017.6	10170.8	6502.76	383	356	289	175	115	81
398	M	65	1.76	65	20.984	1	2.45	68.9	2.26	0.922449	5.13	5.05	3.44	1.53	10.02	106.3	59.37	6.75	4125.09	408.34	9.9	-798.33	-1024	-929	4.16	209.06	2.37	2.98	3.17	5695.9	4428.58	2120.49	17503.8	11520.6	5972.49	1052	606	283	695	266	109
399	M	54	1.74	82	27.0842	1	3.91	99.6	3.48	0.890026	10.42	9.18	4.42	1.73	9.53	96.1	40.85	6.63	5174.84	17.8986	0.345878	-795.836	-936	-893	3.52594	323.694	2.33746	2.79042	3.00013	9660.25	7242.14	4899.05	47780.1	31097.3	18405.5	1777	873	480	1183	427	219
400	M	71	1.61	60	21.1463	0	3.47	83	2.36	0.680115	4.1	3.09	1.77	0.77	4.84	57.9	41.99	5.43	6481.39	991.05	15.29	-877.39	-989	-950	3.38	252.15	2.11	2.55	2.82	5110.67	4850.71	3072.33	79167.4	57480.7	33153.4	1264	894	489	967	527	224
401	M	76	1.7	70	24.2215	0	1.92	53.2	1.29	0.671875	3.32	2.39	0.91	0.36	7.77	105.6	64.77	4.42	4082.72	90.25	9.87	-788.35	-1024	-896	5.54	220.24	4.17	4.07	2.77	4983.43	780.5	674.17	15610.8	8468.15	3495.35	64	696	59	16	20	9
402	M	65	1.65	80	29.3848	0	2.37	62.1	1.72	0.725738	3.86	3.66	1.84	0.4	6.79	83.4	49.85	3.78	4521.59	189.13	4.18	-841.78	-968	-926	3.85	259.44	2.23	2.72	3.03	7555.16	5849.46	3414.71	44982.6	27498.9	13655.2	1652	910	418	1184	465	184
403	M	69	1.68	58	20.5499	1	2.9	74.1	2.07	0.713793	4.77	4.11	1.85	0.46	6.16	75	58.12	5.74	5045.88	329.48	6.53	-859.6	-972	-936	3.82	275.84	2.16	2.6	2.83	5074.44	4297.33	2745.67	53775.4	38834.4	22733.2	1619	925	533	1179	520	268
404	M	68	1.68	65	23.03	1	2.65	76.5	2.13	0.803774	5.62	4.75	2.6	0.79	7.68	94.1	43.43	5.81	3312.82	2.13	0.06	-754.69	-907	-853	4.69	166	3.11	3.57	3.94	4929.29	5089.51	3627.09	2734.41	1694.12	922.26	615	515	318	255	138	63
405	F	62	1.55	71	29.5525	0	1.79	61.2	1.31	0.731844	2.2	2.13	1.46	0.3	4.83	66.7	56.92	3.74	2590.59	26.9	1.04	-786.39	-950	-902	4.65	205.97	2.52	2.82	2.98	5066.15	2357.04	1241.65	18549.6	8546.09	2708.88	1123	435	179	682	224	90
406	F	73	1.54	40	16.8663	0	1.45	75.4	1.32	0.910345	2.39	2.17	1.95	0.85	3.78	58.6	51.66	3.69	2632.85	3.02	0.11	-772.31	-924	-879	4.12	115.48	3.17	3.43	3.51	3956	3384.16	1783.28	4382.34	2869.51	1706.64	431	361	201	151	108	53
407	M	66	1.6	60	23.4375	1	2.44	72.6	1.84	0.754098	3.06	2.83	1.77	0.84	5.88	78.2	39.96	5.11	5376.04	100.08	1.86	-839.09	-958	-917	3.67	156.54	2.78	3.1	3.39	2568.28	3835.89	3019.72	22665	16979.2	12133.8	401	496	419	208	170	122
408	F	59	1.63	44.5	16.7488	0	2.32	87.3	2.11	0.909483	4.68	4.43	3.47	1.44	5.68	72.8	53.88	4.2	3477.5	6.14321	0.176656	-806.417	-932	-898	3.70565	28.9856	3.88635	4.22218	4.09741	572.835	664.691	329.35	6818.41	5410.82	3051.31	51	58	32	14	12	7
409	F	88	1.54	61	25.721	0	0.82	41.2	0.5	0.609756	0.87	0.85	0.31	0.25	3.41	107.3	65.19	7.47	2358.32	5.07	0.21	-763.72	-926	-870	6.81	97.94	3.03	3.32	3.74	2920.77	2409.77	969.08	7292.75	3913.04	1137.98	375	296	94	168	97	19
410	M	74	1.76	60	19.3698	0	2.67	77.4	2.39	0.895131	5.32	5.09	3.09	0.81	6.11	67.8	46.58	5.63	5659.48	350.21	6.19	-864.84	-969	-936	3.59	146.55	2.71	2.89	3.18	2569.33	2931.67	2907.17	45321.8	33399.5	24211.5	362	432	403	227	191	128
411	M	57	1.69	62.5	21.883	1	3.12	82.4	2.62	0.839744	4.08	3.94	3.09	1.47	9.42	103.3	58.22	6.39	5550.83	308.916	5.56522	-851.185	-971	-934	3.38844	274.478	2.07483	2.61706	2.79663	5192.66	4825.51	3330.6	55629.2	36731.8	24865.1	1693	913	578	1324	491	288
412	M	76	1.68	40	14.1723	1	2.13	80.3	1.87	0.877934	5.26	4.34	2.29	1.08	3.76	53.1	56.98	4.51	3318.51	417.678	12.5863	-803.163	-1024	-941	3.98235	210.014	2.27699	2.60747	2.64896	4077.92	3207.47	1507.29	18268.2	10885.6	5192.33	1054	607	319	708	340	182
413	M	79	1.6	52	20.3125	0	1.72	42.4	0.87	0.505814	1.58	0.85	0.49	0.25	1.93	30.2	68.19	4.46	5881.81	2637.4	44.84	-909.74	-1019	-988	3.77	153.46	2.2	2.3	2.73	2173.27	2640.15	1775.21	106801	77025.5	49874.7	564	550	351	417	358	179
414	M	64	1.72	65	21.9713	0	2.93	76.7	2.38	0.812287	6.59	6.51	3.26	0.89	7.28	81	57	5.56	5256.28	74.48	1.42	-832.83	-954	-913	3.48	211.5	2.97	3.39	3.68	5346.19	7142.52	5686.72	18882.4	12957.1	8474.08	603	679	481	268	217	114
415	M	83	1.6	60	23.4375	1	2.63	77.1	1.78	0.676806	3.31	3.12	1.42	0.44	3.4	47.9	62.99	4.8	3756.65	361.34	9.62	-838.52	-989	-939	5.15	126.04	3.06	3.35	3.52	3628.11	3182.15	2553.46	29433	24285.9	17894.8	366	351	271	166	126	78
416	F	60	1.58	60	24.0346	0	1.78	68.3	1.47	0.825843	3.26	3.26	2.14	0.57	7.13	98.2	52.35	3.92	2849.69	12.93	0.45	-762.53	-935	-867	4.42	166.05	2.38	2.86	3.28	4928.07	3238.11	1867.04	13426.3	6363.74	3585.68	861	497	223	537	231	79
417	M	81	1.75	53	17.3061	0	1.92	44.4	1.16	0.604167	2.23	1.61	0.76	0.42	4.92	62.6	65.37	4.8	5342.25	228.88	4.28	-840.33	-972	-923	4.59	288.6	2.24	2.4	2.7	5046.55	4077.03	2537.73	43876.6	28833	15538.2	1607	1070	566	1136	634	307
418	F	57	1.53	54	23.0681	0	2.46	97.5	1.99	0.808943	5.75	5.29	2.75	0.56	7.72	109.8	43.78	5.14	3292.1	19.2584	0.584988	-815.442	-943	-903	3.47329	210.113	2.34678	2.86796	3.00562	5138.87	3920.76	1941.93	24081.8	14880	7785.01	1216	604	282	815	282	127
419	M	70	1.8	95	29.321	0	3.89	100.4	3.32	0.85347	8.96	8.96	5.72	1.41	8.31	87.1	43.6	6.21	3925.97	243.007	6.18973	-740.007	-1023	-906	4.39407	314.52	2.8266	3.21034	3.2193	10527.5	7421.76	3628.17	10182.6	6170.2	3099.1	1349	665	355	663	256	152
420	M	74	1.79	72	22.4712	0	2.93	63.5	2	0.682594	3.81	3.56	1.5	0.6	6.66	72.6	54.34	5.7	6195.13	340.41	5.49	-850.99	-969	-932	4.5	195.07	2.9	3.14	3.38	4402.05	5194.96	4634.36	48157.1	32895.4	20429.9	463	607	483	243	230	132
421	F	67	1.58	53	21.2306	0	1.82	78.3	1.58	0.868132	4.51	4.18	2.08	0.79	6.42	91.7	59.28	4.35	1701.91	0.34	0.02	-680.52	-886	-817	5.54	165.61	2.64	2.84	3.2	3696.05	1705	702.4	2164.22	732.87	216.01	818	329	81	464	173	41
422	F	68	1.54	62.5	26.3535	0	1.38	72.9	1.28	0.927536	3.88	2.37	1.25	0.7	6.49	100.5	46.56	4.32	2351.82	19.6	0.83	-769.04	-947	-895	5.85	164.59	2.58	2.99	3.13	4284.7	2693.19	766.06	13630.7	5884.05	1454.49	859	363	91	489	154	36
423	M	80	1.66	53	19.2336	1	2.85	63	1.59	0.557895	4.05	2.03	0.91	0.41	2.95	38	63.99	5.33	5374.55	553.34	10.3	-846.92	-986	-940	3.93	307.65	2.27	2.69	2.8	6596.94	5427.77	3046.86	55582.7	38814.7	21979.9	1744	1007	526	1222	536	255
424	M	77	1.72	60	25.9695	0	2.93	92.7	2.37	0.808874	5.66	5.41	3.7	0.89	7.17	93.3	58.43	5.88	3203.86	13.0582	0.407576	-759.49	-937	-890	4.43755	243.63	2.49351	2.88699	2.99537	6843.77	4831.66	2512.15	18026.3	11036.6	5753.16	1357	694	305	833	329	148
425	F	54	1.6	50	19.5312	0	2.04	75.2	1.82	0.892157	4.98	4.98	3.47	1.07	6.59	84.5	48.57	3.63	3151.4	6.05	0.19	-803.31	-932	-889	3.83	113.24	3.06	3.31	3.4	3873.25	3439.75	2319.23	15543.3	11739.7	7540.71	434	387	259	169	108	68
426	M	73	1.6	60	23.4375	0	2.42	83.4	1.94	0.801653	6.73	5.32	2.45	0.59	5.47	77.5	52.02	4.59	3534.98	29.8734	0.84508	-782.878	-947	-895	4.18019	197.577	2.11765	2.66631	2.81586	4692.86	3525.64	1761.08	32868.1	19541.8	10857.9	1318	674	324	981	352	137
427	F	69	1.55	65	27.0552	0	1.5	48.3	0.89	0.593333	1.31	1.1	0.62	0.24	2.42	36.4	50.99	2.87	2653.36	103.09	3.89	-729.41	-983	-906	5.99	135.83	2.52	2.92	3.07	2035.2	1572.17	840.02	14297.5	8205.48	3870.28	599	388	189	371	180	74
428	M	69	1.67	70	25.0995	0	2.57	64.4	1.76	0.684825	3.93	2.82	1.35	0.42	6.86	85.1	44.63	4.27	4841.55	702.15	14.5	-844.01	-1024	-948	3.77	273.33	2.27	2.72	2.94	8898.75	6811.16	3586.99	26145	17033.7	9194.95	1700	916	431	1190	459	203
429	M	81	1.74	70	23.1206	0	1.56	44	1.2	0.769231	1.69	1.61	1.19	0.61	5.1	63	65.19	4.77	2722.53	13.96	0.51	-740.96	-939	-882	4.84	140.07	3.29	3.64	3.94	5522.49	4007.77	1536.58	10849.9	7856.06	2644.84	403	253	80	135	71	22
430	M	71	1.68	67.5	23.9158	0	2.86	55.9	1.48	0.517483	3.4	1.65	0.79	0.26	4.51	57.4	52.85	5.24	5842.71	715.53	12.25	-863.22	-983	-945	5.09	249.05	2.44	2.86	3.2	6872.55	6568.01	4298.52	65605.8	47835.9	27319.5	945	762	423	606	349	145
431	F	71	1.5	50	22.2222	0	1.39	75.1	1.22	0.877698	3.38	3.14	1.76	0.42	4.63	74.7	60.76	3.39	2441.67	2.41	0.1	-766.78	-918	-867	4.63	147.11	2.72	3.15	3.37	3590.78	2083.8	1020.74	9234.73	5420.78	1900.15	683	334	160	337	122	51
432	M	58	1.57	55	22.3133	0	2.21	76.6	2.02	0.914027	5.52	5.36	3.4	1.02	3.7	47.9	41.4	4.24	2730.77	2.21	0.08	-699.38	-897	-820	5.49	197.86	2.81	3.56	3.47	8419.02	4038.91	1785.51	5364.8	2061.7	705.17	928	335	128	459	106	50
433	F	64	1.58	59	23.634	0	1.5	71.1	1.39	0.926667	3.57	3.47	2.65	0.84	5.94	86.7	58.11	2.8	1690.87	39.09	2.31	-670.19	-992	-839	4.96	130.61	2.68	2.79	3.18	4138.9	1654.6	551.93	1760.93	407.02	47.93	637	238	50	361	128	19
434	M	77	1.7	68	23.5294	0	2.01	58	1.44	0.716418	3.31	3.23	1.47	0.3	3.58	47	52.32	3.36	3205.16	314.17	9.8	-801.74	-1024	-929	4.71	196.49	2.38	2.71	3.04	5469.91	3444.2	2333.48	13571.9	7124.57	3168.55	1067	531	276	677	267	122
435	F	63	1.55	49	20.3954	0	1.7	72	1.47	0.864706	3.01	3.01	2.44	0.82	6.21	88.4	59.71	4.06	1381.79	0	0	-528.2	-744	-646	6.97	102.51	3.47	3.54	3.38	4610.64	2802.03	600.8	6.32	0	0.9	502	272	67	171	81	26
436	F	62	1.58	55	22.0317	0	1.89	76.5	1.66	0.878307	4.39	3.96	2.15	0.4	5.41	74.1	45.56	3.81	3363.28	30.56	0.91	-821.95	-948	-904	3.94	160.35	2.77	3.3	3.65	3789.13	4458.97	3147.82	15419.1	10718.8	7534.05	627	540	365	269	164	72
437	M	79	1.65	60	22.0386	0	2.75	82.5	1.8	0.654545	2.9	2.56	1.24	0.31	4.6	68.4	51.74	4.41	2848.71	59.93	2.1	-785.25	-961	-910	4.07	180.67	2.41	2.82	2.82	4186.72	2628.47	1381.79	20236.3	9885.16	4445.75	1003	436	207	653	207	111
438	M	64	1.67	62.5	19.9219	0	2.48	55.5	1.63	0.657258	4.84	1.96	1.34	0.54	5.75	67.3	59.83	5.23	5460.88	628.46	11.51	-881.88	-976	-946	4.52	242.68	2.09	2.53	2.88	5418.43	4757.26	3012.66	68823.4	50244.5	28502.7	1494	928	502	1161	528	231
439	F	71	1.58	53	21.2306	0	1.66	78.2	1.5	0.903614	3.68	2.79	2.8	0.82	4.85	71.3	58.11	3.77	1959.47	0.08	0	-707.56	-891	-837	5.23	113.7	3.11	3.46	3.46	3499.98	2179.03	523.27	1270.98	714.11	219.73	574	322	96	214	108	30
440	M	70	1.69	55	19.257	0	3.34	85.2	2.27	0.679641	5.88	3.94	1.85	0.43	6.62	84.1	51.55	5.54	5033.65	279.45	5.55	-854.51	-971	-933	4.05	201.39	2.19	2.53	2.89	3865.96	3479.07	1856	64404.4	37707	20901	984	701	367	724	401	184
441	F	70	1.5	52	23.1111	0	1.59	79	1.27	0.798742	2.41	2.16	1.29	0.54	4.63	75	54.84	3.87	3076.64	112.5	3.66	-818.85	-972	-916	4.5	177.57	2.31	2.59	2.69	4294.69	2688.86	1529.07	24268.4	11356.8	5648.84	1105	601	300	717	324	162
442	M	77	1.59	48	18.9866	0	3	74.7	1.72	0.573333	2.83	2.3	1.05	0.48	2.83	40.3	54.15	5.29	4261.23	438.72	10.3	-830.97	-997	-939	5.11	235.15	2.33	2.71	2.88	4908.45	4369.52	2343.95	41129.3	25950.1	12891.1	1225	821	403	830	449	198
443	M	73	1.65	55	20.202	0	2.19	69	1.74	0.794521	3.02	2.95	2.31	0.63	4.11	54	46.52	4.12	3075.52	335.37	10.9	-791.21	-1024	-934	4.56	188.29	2.35	2.77	2.87	4982.22	3046.09	1482.74	14366.3	6915.69	3076.47	1095	529	232	760	280	116
444	M	68	1.65	58	21.3039	1	2.71	79	2.13	0.785978	4.01	3.86	2.7	0.8	8.82	111	44.67	5.36	2817.22	13.57	0.48	-764.11	-938	-882	4.75	219.35	2.39	2.75	2.92	5020.63	2748.75	1174.37	13538.7	6177.15	2058.44	1254	520	197	818	281	103
445	M	79	1.65	50	18.3655	1	1.98	38.9	1.04	0.525253	3.38	1.12	0.54	0.26	5.06	63.7	65.3	5.04	6576.02	2049.82	31.82	-872.31	-1016	-952	4.6	214.46	2.28	2.72	4.13	665.76	1318.5	3395.55	117399	72297.8	27826.5	42	681	410	10	334	17
446	F	77	1.55	46	19.1467	0	1.8	102	1.72	0.955556	3.56	3.54	2.55	1.22	6.7	105.5	53.6	3.53	2723.16	1.15013	0.042235	-764.864	-919	-871	4.31545	110.879	2.91974	3.0914	3.17734	3029.62	2251.02	862.592	3490.22	1655.5	436.02	506	367	158	241	138	54
447	M	70	1.6	70	27.3438	1	2.36	64	1.81	0.766949	5.81	4.86	1.91	0.47	5.65	68	60.17	4.61	3991.78	17.78	0.45	-808.99	-939	-895	3.71	229.97	2.37	3.01	3.26	6819.12	5321.02	2958.38	23601.3	15239.5	7988.62	1241	678	327	809	283	119
448	M	83	1.56	49	20.1348	0	1.73	41.3	0.84	0.485549	1.72	0.96	0.44	0.18	3.04	47.5	66.8	3.94	4483.6	946.78	21.12	-866.91	-1006	-960	4.74	209.91	2.31	2.73	2.95	3717.57	3256.36	1665.45	60489.4	39020.7	20101	1015	643	321	711	332	144
449	M	71	1.71	60	20.5191	1	2.31	37	1.08	0.467532	2.12	1.18	0.51	0.25	4.5	53	65.19	6.16	6085.82	2412.6	39.64	-895.95	-1019	-979	4.45	226.31	2.57	3.05	3.4	5729.33	7086.18	5484.71	75368.1	61891.5	47261.7	754	728	560	453	297	151
450	M	74	1.7	67	23.1834	0	2.02	44.3	1.21	0.59901	1.99	1.61	0.84	0.24	6.98	86.1	63.04	4.93	2977.17	5.34	0.18	-729.1	-914	-861	4.68	280.37	2.59	2.77	2.73	7254.18	3607.98	1764.81	15487.8	6652.64	3143.01	1293	597	293	795	318	171
451	M	60	1.65	66	24.2424	0	2.6	80	2.28	0.876923	5.31	5.31	5.03	1.21	6.34	76	46.23	4.38	4436.85	6.50485	0.146609	-810.188	-934	-901	4.12885	54.9095	4.01715	4.22221	4.59804	913.584	1249.78	813.167	19504.3	18301.8	11600	64	84	49	19	15	7
452	F	49	1.55	59	24.5578	0	2.1	76	1.78	0.847619	5.74	3.94	2.04	0.8	5.71	75	40.58	3.59	1821.04	32	1.76	-664.19	-980	-825	5.78	157.52	2.87	3.23	3.23	5148.36	2436.32	698.23	918.3	266.94	65.49	772	281	62	380	116	31
453	M	78	1.6	50	19.5312	0	1.82	65.1	1.26	0.692308	1.72	1.72	1	0.45	1.02	16.7	59.1	3.86	3984.59	171.31	4.3	-823.54	-977	-917	5.33	221.86	2.24	2.75	2.87	4582.76	3709.03	2042.01	37830.8	25250.6	12545.4	1238	725	382	880	361	187
454	M	66	1.7	60	20.7612	0	2.55	52	1.62	0.635294	3.18	2.32	1.16	0.52	3.66	41	58.68	5.49	4722.57	420.31	8.9	-873.46	-973	-942	3.36	169.28	1.96	2.47	2.81	2839.29	2669.4	1582.13	62034.8	35764.9	19873.8	915	641	324	716	379	143
455	F	69	1.69	77	26.9598	0	1.7	69.8	1.65	0.970588	4.45	3.69	1.53	1.53	5.85	75.8	56.48	4.2	3786.84	23.92	0.63	-806.79	-943	-896	4.86	225.69	2.39	2.78	2.87	7870.53	5485.28	2964.42	21281.8	12348.4	5594.86	1341	723	365	882	358	173
456	F	70	1.57	60	24.3418	0	1.36	77.3	1.13	0.830882	2.95	2.95	2.1	0.43	2.67	45.5	52.26	2.67	2279.59	1.11	0.05	-743.56	-908	-853	5.45	129.08	2.52	3.19	3.47	3661.65	2363.33	946.48	8409.52	3154.92	1055.66	648	257	100	382	89	33
457	M	64	1.6	50	19.5312	1	2.61	79.8	2.15	0.823755	3.68	3.68	2.5	1.18	5.7	72	44.57	4.84	4591.77	28.23	0.61	-809.65	-940	-889	3.82	176.32	2.83	3.33	3.66	3931.4	4689.13	3481.78	7990.62	4793.98	2776.99	572	552	374	280	158	93
458	F	62	1.55	65	27.0552	0	2.25	95	1.91	0.848889	4.42	4.33	2.67	1.08	4.54	65	44.79	3.33	3067.96	0	0	-757.947	-887	-845	3.77567	39.446	5.48007	4.73323	4.67895	1164.88	1249.05	584.689	5.53745	0	0	38	62	31	4	12	4
459	M	54	1.5	65	28.8889	0	1.38	26.5	0.72	0.521739	1.91	0.66	0.2	0.2	4.45	56.6	60.33	3.98	6288.7	419.55	6.67	-869.53	-971	-937	4.62	318.92	2.13	2.6	2.9	6255.23	5822.75	4473.17	66873	49702.1	31013.3	1751	1110	674	1317	601	320
460	M	72	1.68	64	22.6757	0	2.73	77.5	2.1	0.769231	4.41	3.95	1.94	0.72	6.18	77.2	52.32	5.98	4206.46	50.86	1.21	-807.48	-952	-904	4.55	148.66	3.01	3.24	3.61	3581.93	3623.85	2310.38	12777.8	7372.1	3622.42	473	474	284	236	170	87
461	M	73	1.8	93	28.7037	0	3.05	78.7	2.51	0.822951	5.76	5.3	3.12	0.76	7.35	79.2	43.22	4.99	3381.09	0.07	0	-754.47	-897	-852	5.41	164.62	3.13	3.6	3.8	6409.66	5009.7	2991.26	5378.4	3773.7	2227.81	667	503	289	233	110	60
462	M	86	1.63	51	19.1953	0	2.38	73.5	1.4	0.588235	3.73	2.01	0.88	0.24	4.01	65.9	64.99	4.88	4199.68	255.01	6.07	-837.16	-978	-929	5.05	123.93	2.03	2.32	2.44	2638.33	1940.94	1273.72	38401.3	23447.7	11299.6	713	497	286	578	344	167
463	M	51	1.76	51.5	16.6258	0	2.39	61.7	2.25	0.941423	5.45	5.45	4.02	2.52	6.56	63.7	43.68	4.71	3790.45	21.94	0.58	-822.69	-944	-906	2.92	162.4	2.86	3.22	3.46	3907.04	3661.28	2364.99	12898.1	10268.2	6909.5	631	537	359	294	176	90
464	M	82	1.75	75	24.4898	0	2.26	67.4	1.69	0.747788	3.42	3.25	1.67	0.48	3.81	50.3	49.59	3.57	2534.77	2.13	0.08	-723.66	-910	-848	6.04	182.68	2.6	3.18	3.26	5721.4	4162.12	2145.49	7804.33	3668.61	2055.74	928	414	198	507	167	75
465	F	76	1.55	51	21.2279	0	1.66	68	1.06	0.638554	2.3	1.53	0.75	0.21	5.56	91	76.91	5.73	3382.18	11.94	0.35	-793.09	-937	-889	4.62	136.49	3.09	3.41	3.52	4662.71	3644.76	2346.8	5827.94	4318.17	2996.32	544	425	262	224	133	60
466	M	66	1.72	55	18.5911	1	2.65	43.5	1.31	0.49434	3.57	1.49	0.69	0.24	5.24	59.6	56.8	4.95	5657	1817.01	32.12	-888.38	-1021	-977	4.06	194.79	2.58	2.84	3.24	4457.06	5488.81	4816.21	74892.8	54626.1	36956.8	659	674	534	401	330	172
467	M	72	1.6	50	19.5312	0	1.87	77.5	1.85	0.989305	4.22	4.22	3.35	1.98	11.16	155.2	57.5	8.86	3372.33	40.03	1.19	-798.76	-952	-900	3.81	132.26	2.85	3.29	3.74	3151.45	3821.82	2572.59	12627.3	7477.4	4381.06	428	431	273	224	142	56
468	F	65	1.59	55	21.7555	0	2.14	70.1	1.48	0.691589	5.33	4.58	1.2	0.27	6.94	96.7	58.96	3.92	3070.01	0.16	0.03	-754.68	-904	-845	5.38	158.75	2.98	3.92	4.58	3513.55	2917.49	317.53	691.8	1250.38	164.79	629	490	23	274	165	95
469	F	74	1.62	75	28.578	0	2.56	110.3	2.21	0.863281	6.1	6.1	3.5	1.15	5.64	80.7	43.43	3.71	2386.22	3.16458	0.132619	-679.434	-913	-839	4.81019	167.621	3.07629	3.86231	3.52215	8837.49	5109.74	1849.53	6526.72	3618.77	959.16	716	329	126	291	65	45
470	F	62	1.6	55	21.4844	0	1.99	75	1.67	0.839196	2.68	2.59	2.4	0.78	5.32	71	53.6	3.94	2331.98	2.03	0.09	-746.01	-917	-867	4.89	178.11	2.58	3.09	2.96	5190.82	2681.49	920.46	8526.77	3881.94	1247.09	897	367	127	522	145	60
471	M	85	1.72	72	24.3375	0	2.07	46.4	1.13	0.545894	1.95	1.45	0.63	0.29	7.53	101.2	49.72	5.03	4821.13	200.97	4.17	-848.9	-966	-930	5	163.16	2.85	3.14	3.3	3412.59	3344.71	3402.07	33375.1	24794.2	16523.8	520	531	427	256	195	135
472	M	70	1.68	65	23.03	0	2.69	74	2.05	0.762082	5.92	5.88	2.19	0.55	6.85	84	51.94	4.94	4175.61	9.01	0.22	-805.7	-933	-892	4.83	186.8	2.9	3.38	3.53	5287.96	5515.09	3974.96	9654.85	7292.56	5159.85	662	577	427	315	174	129
473	M	69	1.62	63	24.0055	0	3.45	121.3	3.07	0.889855	6.4	6.4	5.52	1.86	10.66	141.3	59.3	5.46	4277.31	5.65893	0.132301	-783.892	-929	-889	4.23167	45.5222	3.92289	4.35134	4.00923	893.875	1810.83	1237.53	6248.08	5214.79	2942.76	56	87	72	13	15	10
474	M	63	1.7	70	24.2215	0	2.89	72	2.18	0.754325	3.78	3.69	1.81	0.76	4.92	56	42.88	4.88	6171.84	110.05	1.78	-834.27	-956	-917	4.63	253.88	2.99	3.44	3.75	4826.98	6162.99	5236.44	25238	16329.4	11176	634	662	512	267	192	124
475	M	74	1.68	56	19.8413	0	2.14	52.9	1.22	0.570093	2.38	1.45	0.67	0.41	7.66	108.9	72.71	5.47	3934.36	27.5	0.7	-802.75	-945	-898	6.9	171.98	2.87	3.37	3.73	4943.01	4842.55	3266.59	12983.3	8923.3	5730.58	676	568	364	318	193	101
476	F	77	1.63	65	24.6094	0	1.66	85.5	1.39	0.837349	2.24	1.99	1.65	0.76	5.28	84.9	59.94	4.3	2201.95	0.209631	0.00952	-724.641	-903	-853	5.68313	106.982	3.15936	3.65434	4.15091	4355.16	3780.58	2468.6	2900.49	1803.78	628.893	373	294	141	153	77	24
477	M	63	1.7	50	17.301	0	2.94	58.1	1.75	0.595238	4.03	2.14	1.14	0.37	5.51	62.8	66.73	5.48	5299.86	762.49	14.39	-874.63	-1000	-949	4.34	271.92	2.19	2.63	2.66	4929.52	4365.25	2623.29	62536.3	46451.8	31082	1508	921	589	1086	487	316
478	M	77	1.79	65	20.2865	0	2.28	38.4	1.16	0.508772	2.92	1.08	0.55	0.21	4.05	45.4	64.79	5.12	5470.74	378.93	6.93	-849.6	-973	-935	4.6	294.58	2.15	2.45	2.58	6434.74	5648.49	3187.17	64981.9	46528.6	26248	1677	1052	562	1233	655	320
479	M	83	1.65	51.5	18.9164	0	1.72	50.8	0.97	0.563953	2.73	1.38	0.51	0.18	3.46	57	65.44	3.77	3908.86	178.64	4.57	-845.84	-965	-931	4.3	196.44	2.02	2.39	2.52	3254.25	2819.52	1555.57	42537.9	27274.4	13357.6	1299	806	396	1005	511	228
480	F	74	1.59	55.2	21.8346	0	1.71	76.7	1.44	0.842105	2.68	2.68	2.02	0.66	4.64	68.8	58.54	4.02	3119.03	4.05	0.13	-788.98	-926	-881	4.71	206.78	2.43	2.86	3.21	4547.23	3278.27	1592.73	14762.5	8575.39	4061.72	1133	585	259	708	262	95
481	M	71	1.7	50	17.301	1	2.26	68.4	1.87	0.827434	4.07	3.57	2.09	0.81	6.03	74.7	54.49	4.9	5178.17	1041.1	20.11	-855.75	-1024	-964	3.76	183.03	1.93	2.3	2.6	4586.77	3789.79	2675.71	39963.2	26334.2	14428	1195	844	448	983	577	238
482	F	67	1.5	33	14.6667	0	1.08	59.3	1.01	0.935185	3.17	3.17	1.65	0.76	4.03	63.4	65.86	3.04	2310.05	2.21	0.1	-754.71	-919	-862	4.42	152.32	2.65	2.92	2.78	2577.76	1214.22	451.43	6524.29	2796.82	1139.08	678	310	122	382	139	64
483	M	84	1.7	76	26.2976	0	2.07	69	1.76	0.850242	2.48	1.94	1.72	0.93	5.52	71	45.38	4.1	2647.44	0.22	0.01	-686.68	-876	-816	5.93	171.53	3.51	3.83	3.95	7369.07	5606.19	3154.99	1414.09	743.12	305.43	629	440	252	180	117	61
484	M	76	1.64	60	22.3081	0	3.21	110.4	2.62	0.816199	5.72	5.72	3.17	1.01	6.46	89.7	58.43	4.38	5591.95	203.545	3.63996	-843.412	-960	-932	3.54262	43.781	4.04889	4.31797	3.83434	1041.03	753.868	980.65	30481.3	34160	21790.2	59	48	61	17	9	14
485	F	59	1.6	53.5	20.8984	0	2.05	76.5	1.76	0.858537	4.58	4.58	3.01	0.77	6.22	82.3	62.32	4.09	2106.98	0	0	-669.01	-856	-804	5.27	141.98	3.42	3.84	4.06	5199.86	3608.34	1890.5	472.96	227.14	150.44	565	362	188	181	93	32
486	F	68	1.55	64	26.6389	0	1.8	73.4	1.37	0.761111	3.07	2.3	1.19	0.32	4.88	72.8	57.13	4.42	3072.46	7.09	0.23	-775.08	-932	-886	6.09	156.13	3.01	3.33	3.59	4129.27	3259.36	1959.01	9448	7002.2	4691.82	609	463	275	255	156	77
487	F	85	1.55	54	22.4766	0	1.72	95	1.54	0.895349	4.54	4.46	2.92	0.81	4.27	68	59	3.55	3122.42	8.79211	0.28158	-767.784	-930	-869	4.53086	125.922	2.93481	3.42935	3.75978	4424.05	4637.93	2472.54	5126.67	2880.35	1134.47	525	436	215	229	118	38
488	M	61	1.78	80	25.2493	0	2.83	60.1	2.08	0.734982	6.05	5.34	2.08	0.44	7.59	77	47.15	5.43	5504.83	4.33	0.08	-806.11	-926	-887	3.41	217.15	2.93	3.37	3.85	5872.21	7111.22	6061.99	10830.8	7636.46	5662.61	656	684	495	276	189	98
489	F	64	1.66	55	19.9594	0	2.27	69.9	1.68	0.740088	3.14	3.08	1.83	0.45	7.18	92	61.97	4.35	3193.41	36.83	1.15	-752.06	-952	-867	5.98	219.75	2.49	2.81	3.04	5907.69	4153.46	1919.77	12696	7563.7	3184.34	1122	628	281	682	320	133
490	M	50	1.65	78	28.6501	0	3.3	95.9	3.08	0.933333	7.19	6.68	4.27	2.07	9.77	107	46.16	6.63	3954.64	303.136	7.66533	-783.872	-1023	-917	4.52541	280.153	2.51898	3.171	3.15411	9262.46	6183.95	3606.93	11291.6	6810.19	3555	1521	731	404	929	297	181
491	F	75	1.55	55.5	23.1009	0	1.37	64.3	1.04	0.759124	2.92	2.92	1.03	0.28	4.13	66.6	60.04	2.95	2241.85	0.55	0.02	-721.67	-904	-838	6.23	129.11	3.24	3.4	3.83	3938.12	2721.15	1745.41	2995.22	1588.86	596.24	558	373	190	202	119	51
492	M	76	1.7	70	24.2215	1	2.6	84	2.23	0.857692	5.37	5.06	3.57	1.1	6.44	81	49.69	5.58	3436.5	38.0488	1.1072	-769.82	-951	-899	4.42783	185.409	2.77655	3.3119	3.66362	8736.19	6040.25	3413.94	21468.9	13995.1	6543.33	781	459	220	407	150	48
493	M	68	1.75	74.6	16.6258	1	2.47	74.3	1.84	0.744939	5.19	3.89	1.73	0.5	5.46	73.9	48.47	4.46	4963.78	28.64	0.58	-826.94	-943	-904	4.09	151.36	2.88	3.24	3.52	3582	4876.59	4106.86	15002.7	11059.7	7900.68	348	459	400	153	152	100
494	F	58	1.6	59	23.0469	0	1.9	77	1.69	0.889474	3.22	3.22	2.45	0.87	6.31	85.8	40.58	4.31	2161.71	0	0	-699.48	-855	-800	6.1	205.38	2.54	2.65	2.85	5327.36	2677.05	1031.14	2935.42	1268.46	417.33	1080	473	165	644	271	90
495	M	79	1.7	56	19.3772	0	2.11	64.7	1.67	0.791469	4.25	3.48	2	0.55	3.18	40.9	46.96	3.45	3477.78	758.77	21.82	-844.6	-1024	-969	3.38	180.81	2.38	2.77	2.96	4025.27	3230.77	1468.8	33818.9	22459.6	10681.4	967	554	262	624	284	109
496	M	72	1.7	50	17.301	0	2.02	45.5	1.27	0.628713	2.25	1.54	0.91	0.48	6.92	84	56.8	5.68	5054.92	620.36	12.27	-864.33	-995	-945	4.48	239.62	2.17	2.59	2.86	4357.45	3564.5	2206.12	60483	41827.5	25689.7	1312	841	441	982	480	198
497	F	59	1.67	65	23.3067	0	2.05	66	1.7	0.829268	3.05	3.02	2.48	0.75	6.31	77.6	57	3.75	2407.69	0.04	0	-694.9	-864	-805	6.41	168.01	3.18	3.65	3.83	5473	3849.26	1943.77	840.1	423.83	154.73	772	474	220	280	147	65
498	F	52	1.56	58	23.833	0	2.48	86	2	0.806452	5.24	5.19	2.85	0.7	5.33	70	41.39	4.02	2897.02	1.5542	0.053648	-782.447	-922	-881	4.59007	35.5747	5.66219	4.38075	4.24942	807.645	1111.65	606.496	2641.44	2253.47	1414.81	37	75	45	5	12	11
499	F	45	1.59	43	17.0088	0	1.52	33.5	0.87	0.572368	2.24	1.36	0.43	0.14	4.86	59.6	49.72	3.09	3165.34	277.85	8.78	-824.34	-980	-937	4.57	199.72	2.34	2.55	2.68	3950.58	2498.87	1620.54	28141	15273.2	7415.02	937	609	298	624	367	169
500	M	71	1.64	65	24.1672	0	1.91	42.6	1	0.52356	2.75	1.19	0.59	0.23	7.81	110.3	76.91	4.92	4584.76	185.87	4.05	-835.34	-970	-922	5.39	184.02	2.89	3.37	3.73	4000.01	4434.19	4205.61	23163.5	16588.4	12278	557	532	419	258	156	99
501	M	89	1.74	70	23.1206	0	1.81	47	1.21	0.668508	2.85	2.08	0.89	0.25	2.82	36	46.63	2.93	3433.74	14.58	0.42	-776.82	-935	-885	5.79	134.89	3.06	3.58	3.61	4517.94	4046.68	1745.46	13052.5	12266	4190.21	376	285	116	164	76	27
502	M	75	1.72	73	24.6755	1	2.74	71.7	2.02	0.737226	3.9	3.9	2	0.46	7.07	84.9	54.3	5.08	4924.95	12.58	0.26	-804.16	-933	-890	4.43	216.24	2.99	3.39	3.61	6286.69	6806.5	5056.25	10858.6	6271.59	3629.91	767	678	495	305	196	131
503	M	66	1.68	65	23.03	0	3.43	104	2.96	0.862974	7.28	7.28	5.3	1.73	6.23	74	40.28	5.45	2841.8	4.27671	0.150493	-785.007	-933	-896	3.57824	196.896	2.47591	2.91418	3.01913	6677.52	4184.98	2058.88	21451.2	12837.3	6263.42	1158	525	232	742	247	114
504	M	78	1.75	65	21.2245	0	2.11	68.3	1.81	0.85782	3.6	3.44	2.43	0.93	3.26	41.2	60.48	3.4	4410.22	70.56	1.6	-828.03	-956	-913	3.61	208.63	2.29	2.73	3.04	5809.02	4932.35	2581.38	40665.8	26942.7	14732.1	1021	649	301	703	333	121
505	M	73	1.8	85	26.2346	1	1.79	52.7	1.45	0.810056	3.89	3.75	2.17	0.47	3.6	44.1	64.44	3.15	2834.3	1.37	0.05	-709.38	-905	-842	5.18	166.75	3.26	3.91	4.01	6050.61	5864.81	2950.19	3889.33	2223.57	1193.43	630	439	246	213	97	50
506	F	47	1.56	47	19.313	0	1.16	41	0.98	0.844828	2.73	2.06	1.08	0.44	4.21	54.5	51.14	2.5	2141.09	8.62	0.4	-770.88	-933	-872	5.15	129.41	2.03	2.45	2.72	2542.12	1573.05	651.66	17331.5	7101.99	3194.17	968	427	150	750	253	77
507	F	79	1.58	44	17.6254	0	1.51	77.8	1.3	0.860927	2.34	2.08	1.46	0.79	3.54	56	45.97	2.56	3049.4	39.31	1.29	-788.27	-953	-897	5.8	164.52	2.33	2.64	2.99	3674.01	2165.98	1160.71	15099.2	7679.59	2839.22	913	509	216	611	274	101
508	M	81	1.72	55	18.5911	1	1.98	50	1.23	0.621212	3.13	1.55	0.78	0.39	3.97	53	57.7	5.7	7312.64	2598.5	35.53	-903.15	-1000	-968	3.7	301.24	2.14	2.54	2.79	5696.58	5167.96	3564.7	117038	87443.7	53996.3	1689	1144	634	1271	656	306
509	F	76	1.54	46	19.3962	0	1.66	100.4	1.64	0.987952	3.13	3.13	2.55	1.36	5.09	81.7	65.89	4.09	2572.34	20.3533	0.791239	-778.835	-946	-893	4.50768	175.996	2.58508	2.99656	2.96736	4321.92	2831.51	1138.39	13407	7532.3	2922.11	938	446	177	521	187	77
510	M	79	1.65	60	22.0386	1	2.33	81.3	1.93	0.828326	4.68	4.16	2.02	0.9	6.63	91.8	63.32	5.14	3107.53	36.923	1.18818	-765.579	-953	-894	4.65738	192.23	2.50062	3.01383	2.98	7097.21	4822.54	2624.25	21495.8	11819.3	5820.6	907	445	223	570	193	99
511	M	52	1.7	75	25.9516	1	3.4	77.7	2.62	0.770588	5.6	5.26	3.33	0.81	9.18	96.1	38.04	5.47	4443.11	0.73	0.02	-781.37	-908	-864	4.68	298.84	2.31	2.78	2.86	7779.78	6038.14	3751.04	18527.6	12173.6	6504.39	1706	877	458	1146	449	232
512	M	79	1.7	61	21.1073	1	3.18	87.3	2.22	0.698113	5.79	4.52	1.82	0.56	7.56	98.6	40.59	5.24	4877.57	9.68	4.64	-813.35	-969	-930	4.05	241.56	4.11	4.09	2.76	561.51	1025.32	2777.4	48564.5	30794.4	9896.42	40	913	60	12	28	221
513	M	86	1.64	70	26.0262	0	2.53	74.6	1.61	0.636364	5.22	2.34	1.04	0.21	7.1	105.8	35.66	5.78	5294.88	319.57	6.04	-839.79	-974	-930	5.13	187.65	3.03	3.33	3.73	4432.33	6300.91	5700.93	52058.5	38115	27624.2	431	579	460	182	190	87
514	F	69	1.58	47	18.8271	0	1.34	50.7	1	0.746269	3.59	2.17	0.7	0.28	3.63	52.6	52.26	2.67	2659.91	5.87	0.22	-757.34	-924	-864	5	192.23	2.41	2.69	2.81	3627.29	2106.45	936.17	8339.93	4506.26	1780.53	1068	522	225	652	273	121
515	M	61	1.68	60	21.2585	1	2.25	63.6	1.92	0.853333	5.7	4.77	2.01	0.87	5.88	67.3	60.03	4.42	4167.01	198.31	4.76	-852.74	-970	-929	4.68	231.37	2.2	2.69	2.95	5771.08	4647.97	2560.27	42799.2	28105.3	14695.3	1483	773	402	1074	395	177
516	M	68	1.62	70	26.6728	1	2.48	83.6	2.17	0.875	6.16	6.16	3.69	1.1	5.52	71.9	40.28	4.23	2351.56	0.383481	0.016307	-711.935	-883	-833	4.98913	118.72	3.07712	3.45821	3.6307	5045.74	4170.19	1606.27	2185.84	1161.26	456.244	580	395	163	243	115	45
517	F	73	1.65	51	18.7328	0	1.37	66.3	1.2	0.875912	3.24	3.24	2.13	0.61	4.72	71.6	47.8	3.13	2217.15	2.29	0.1	-763.54	-919	-866	5.17	149.67	2.38	2.68	2.61	3627.95	1785.99	424.9	7705.54	3029.48	766.98	934	399	92	628	213	45
518	F	68	1.55	67	27.8876	0	1.35	55	1.03	0.762963	2.26	1.46	1.13	0.41	3.47	51.7	65.3	3.08	2721.02	0.45	0.02	-723.22	-890	-834	6.13	160.34	3.06	3.66	3.82	5283.83	4844.72	2540.61	2172.34	1379.03	659.72	668	465	269	276	120	65
519	F	81	1.56	64	26.2985	0	1.49	71	1.04	0.697987	3.13	1.82	0.76	0.19	3.57	58.5	63.27	3.25	2633.2	66.15	2.51	-802.87	-964	-910	5.11	146.78	2.54	3.1	3.37	4770.32	2888.36	1217.03	20033.9	8600.85	3347.55	798	352	112	485	139	41
520	M	81	1.6	41	16.0156	0	2.46	80.7	1.72	0.699187	3.25	3.16	1.37	0.45	3.58	54.2	57.76	4.86	4554.43	1259.28	27.65	-872.19	-1024	-977	3.81	213.55	2.18	2.46	2.77	3682.7	3096.79	1879.01	50932.2	32373.5	17706.4	1199	799	401	866	487	198
521	F	57	1.53	60	19.4674	0	2.06	67.3	1.65	0.800971	3.63	3.21	1.59	0.53	7.75	98.6	72.55	4.09	3533.21	18.56	0.53	-810.81	-942	-898	4.27	239.31	2.48	2.78	3.04	7440.67	5168.27	2797.08	22313.9	14245.8	6827.66	1467	706	324	912	352	155
522	F	73	1.6	53	20.7031	0	1.99	74	1.36	0.683417	3.07	1.86	0.81	0.24	5.41	81.4	42.81	3.06	2689.55	36.34	1.35	-785.4	-954	-896	5.93	176.67	2.4	2.64	2.73	4155.97	2068	898.32	15169.7	6170.9	1923.98	1022	469	185	663	261	94
523	M	73	1.83	57	17.0205	0	3.02	44	1.47	0.486755	3.9	1.58	0.71	0.3	1.75	18	56.51	5.36	6529.76	1694.7	25.95	-875.55	-1015	-971	3.64	366.21	2.13	2.47	2.5	6364.02	5307.69	2962.8	96134.2	69857.3	43086.1	2301	1393	779	1688	866	489
524	M	62	1.7	77.5	26.8166	0	2.97	78.9	2.43	0.818182	6.03	4.55	2.26	0.79	7.83	88	37.27	5.85	3703.14	19.81	0.53	-785.99	-941	-889	5.21	253.46	2.49	2.82	3.01	8078.28	5504.41	2961.25	18597.9	11044	5066.68	1388	770	345	845	404	166
525	M	85	1.6	42.5	16.6016	0	1.68	76.4	1.51	0.89881	3	2.86	1.93	1.14	3.99	63.7	51.66	3.54	4142.29	406.57	9.82	-847.37	-987	-938	3.56	209.95	2.18	2.44	2.67	3666.39	2842.6	1662.05	43456.1	26215.3	12069.7	1229	836	398	894	509	202
526	F	75	1.54	47	19.8178	0	1.36	77	1.22	0.897059	2.65	2.65	1.83	0.71	3.64	59.5	53.41	2.85	2126.51	62.81	2.95	-772.56	-978	-893	4.78	139.53	2.3	2.38	2.83	3226.55	1475.59	561.52	13197.7	4713.21	1466.33	846	404	115	569	249	61
527	M	60	1.75	54	17.6327	0	1.28	22.8	0.67	0.523438	1.7	0.61	0.28	0.18	6.1	68.4	64.01	4.09	6423.04	1838.99	28.63	-881.94	-1024	-977	5.06	293.43	2.32	2.81	3.16	7938.32	7547.66	5741.61	70755	52439.1	35730.8	1292	883	540	910	440	215
528	M	75	1.7	55	19.0311	0	1.3	22	0.58	0.446154	1.3	0.55	0.31	0.15	1.77	22	68.18	4.1	5611.76	362.69	6.46	-860.25	-975	-934	4.95	278.49	2.07	2.64	2.8	5272.4	4768.63	3036.73	53857.9	38594.8	22711.5	1592	972	553	1214	525	254
529	M	68	1.7	75	25.9516	0	2.69	72	2.08	0.773234	4.86	4.59	2.51	0.59	6.37	75.3	42.58	4.34	3516.68	44.18	1.26	-802.9	-952	-903	4.59	147.51	3.03	3.22	3.56	4003.18	3928.72	2486.65	29410.9	19866.3	12276	521	494	293	228	178	81
530	M	78	1.6	49	19.1406	0	3.15	100.9	2.12	0.673016	6.63	6.01	1.39	2.35	5.66	86.9	25.5	5.82	3655.07	5.83	0.16	-756.02	-923	-876	4.13	275.93	2.58	3.06	3.12	9751.96	7532.5	3917	13323.9	8811.93	5057.11	1455	754	370	862	305	145
531	M	79	1.62	61	23.2434	0	2.21	77.1	1.75	0.791855	4.51	4.34	2	0.64	4.12	59.3	30.35	3.23	3683.5	104.25	2.83	-821.1	-961	-922	4.42	152.88	2.97	3.28	3.41	3714.3	3731.36	2483.63	20484.7	13147.6	7938.79	556	474	355	251	168	109
532	M	53	1.68	83	29.4076	1	3.68	88.9	2.97	0.807065	6.45	5.75	4.17	1	8.27	87.2	36.3	6.06	4808.96	21.5742	0.448626	-807.608	-941	-901	3.93684	299.644	2.37632	3.04172	3.24342	10566.6	8816.94	5502.14	29240.3	19742.2	12150.7	1760	882	489	1194	361	203
533	M	80	1.76	69	22.2753	1	2.54	76.7	1.88	0.740157	5.47	4.86	1.93	0.34	4.32	58	57.83	4.93	2337.27	1.52	0.06	-701.99	-909	-840	4.97	141.96	3.29	3.52	3.72	5449.95	3897.99	1698.07	2809.22	1442.28	628.36	626	386	154	227	142	50
534	F	55	1.63	66	24.841	0	1.4	43	1.07	0.764286	3.32	2.48	1.07	0.34	3.14	39	60.76	2.7	2073.31	5.84	0.28	-693.27	-929	-844	5.9	114.86	2.6	2.93	3.36	3761.94	2355.55	954.74	6246.99	2964.73	1056.69	605	308	114	346	124	36
535	M	55	1.6	68	26.5625	0	2.59	79.2	2.29	0.88417	6.75	5.52	3.05	1.26	8.14	97.3	39.1	4.61	3208.29	6.34	0.2	-799.57	-932	-890	4.85	214.59	2.39	2.82	2.96	5220.29	3326.55	1814.11	22340.8	8953.9	3789.54	1128	529	253	696	268	119
536	M	65	1.68	50	17.7154	1	2.5	56	1.63	0.652	2.7	2.57	1.11	0.56	1.51	17	55.32	4	5683.77	707.4	12.45	-834.61	-997	-942	3.86	265.49	2.24	2.57	2.71	5595.71	4252.34	2754.09	84161.7	51259.6	33260.2	1352	830	494	940	454	244
537	M	82	1.7	80	27.6817	0	2.13	65.2	1.62	0.760563	3.86	2.48	1.56	0.58	5.72	75.9	37.09	3.64	3955.44	467.42	11.82	-831.64	-988	-944	4.13	205.85	2.58	3	3.25	6053.8	5749.67	2852.99	41778.9	25342.4	11022	882	561	288	544	254	111
538	M	69	1.78	71	22.4088	1	2.75	53	1.72	0.625455	2.89	2.44	1.18	0.5	5.53	58.9	58.57	5.19	3899.28	5.77	0.15	-751.64	-911	-859	5.7	272.1	2.28	2.6	2.79	5492.58	4377.7	2118.07	18106.6	9682.2	4353.72	1410	799	349	966	457	198
539	M	71	1.7	54	18.6851	0	2.43	63.6	1.78	0.73251	4.02	3.59	1.52	0.56	4.3	52.2	64.06	4.7	3744.17	60.87	1.63	-791.42	-960	-891	4.26	229.36	2.24	2.78	3.04	5648.99	4123.95	2004.19	34621.8	17635.8	9620.82	1296	701	309	914	349	131
540	M	86	1.6	48	19.9219	0	2.07	37.5	0.93	0.449275	1.79	0.95	0.47	0.24	5.18	68.8	65.19	3.75	5199.5	834.64	16.05	-858.72	-992	-951	6.04	205.71	2.2	2.69	2.94	4991.55	5025.6	2745.12	72786.6	40984.2	22381.5	943	705	363	690	370	156
541	F	79	1.55	52	21.6441	0	1.2	59	1	0.833333	2.39	2.39	1.32	0.32	2.92	46	57.59	3.08	2485.41	258.18	10.39	-775.19	-1024	-927	4.65	131.84	2.48	2.74	2.83	4175.02	2458.17	1382.63	12354.5	6575.28	2899.41	727	403	195	465	198	100
542	M	66	1.62	60	22.8624	0	2.76	98.8	2.56	0.927536	5.03	4.99	4.36	1.87	12.46	162.2	61.27	3.69	3288.29	0.059225	0.001801	-709.828	-877	-819	5.56543	236.664	2.62948	3.23055	3.26074	7744.09	5914.6	3064.01	5728.22	3002.82	1310.23	1077	535	269	616	196	117
543	M	77	1.72	63	21.2953	0	2.66	65.4	1.73	0.650376	2.87	2.7	1.15	0.6	2.63	33.2	60.48	5.49	5729.31	988.46	17.25	-858.09	-1009	-955	3.61	221.31	2.81	3.24	3.58	4280.69	6069.6	4677.41	57347.8	47271.4	36978	649	729	501	302	240	123
544	M	73	1.68	54	19.1327	1	2.57	68.5	1.85	0.719844	4.68	4.42	1.54	0.43	3.93	49.1	48.47	3.96	3751.49	9.84	0.26	-780.03	-930	-874	3.97	166.91	3.11	3.43	3.63	3936.28	4287.86	3259	5808.65	3223.03	1721.11	552	485	374	209	133	104
545	F	73	1.6	66	20.5486	0	1.47	75	1.44	0.979592	3.8	3.8	2.98	1.32	1.4	20	66.44	3.92	2305.1	0.76	0.03	-708.29	-898	-836	5.12	124.63	3.3	3.71	3.89	4261.5	3359.07	1802.61	1922.17	1116.32	498.34	446	316	170	157	82	31
546	M	61	1.75	50	16.3265	0	2.83	74.4	2.47	0.872792	4.97	4.72	3.43	1.43	4.74	49.8	47.81	3.49	3039.32	299.77	9.86	-784.87	-1024	-926	4.23	175.44	2.46	2.74	3.23	4785.14	2884.66	1257.5	12012.2	5855.56	2439.96	962	472	161	626	250	70
547	F	43	1.6	52	20.3125	0	2.52	85	2.29	0.90873	4.45	4.33	3.26	1.67	5.37	64	48.57	4.06	3972.89	797.632	20.0769	-853.691	-1024	-962	2.77442	216.624	2.19478	2.74234	2.89711	4825.55	3893.69	2021.09	33062.3	22381.8	12646.6	1493	690	362	1102	353	153
548	M	57	1.68	85	30.1162	1	2.8	71	2.22	0.792857	6.08	4.34	2.15	0.89	6.79	76	47.2	4.91	3951.98	11.47	0.29	-805.24	-935	-892	4.54	252.16	2.33	2.75	2.98	7360.69	5077.31	2673.08	22515	14640.2	7213.07	1539	775	355	1050	414	175
549	M	81	1.67	62	22.231	0	2.54	76.1	1.85	0.728346	4.03	3.68	1.78	0.43	5.35	72.6	50.99	4.42	4748.65	1406.26	29.61	-860.85	-1209	-997	2.84	174.31	2.42	2.8	3.3	3592.83	4183.33	2286.72	47643	41307.7	19925.3	635	552	240	423	286	85
550	F	80	1.51	54	23.6832	0	1.65	111.5	1.53	0.927273	2.55	2.55	2.21	1.22	5.08	89	57.13	3.92	2282.16	14.1154	0.61851	-754.195	-943	-887	5.00688	78.6331	2.29256	2.72167	3.22297	2770.14	2107.44	805.443	8295.07	4033.37	1650.32	447	278	96	305	144	33
551	M	85	1.6	53	53	0	1.47	49.6	1	0.680272	1.92	1.53	0.78	0.3	3.64	57.5	57.97	4.04	3375.67	16.65	0.49	-758.6	-940	-884	4.56	219.26	2.5	2.78	2.88	7198.77	4265.6	2028.16	17250	7998.77	3448.8	1259	540	243	799	280	123
552	M	69	1.78	67	21.1463	0	2.67	55.9	1.64	0.614232	3.42	2.25	0.97	0.43	4.02	46.9	62.11	6.02	5954.34	1558.11	26.17	-888.6	-999	-962	4.58	153.95	2.05	2.32	2.72	4158.58	4709.69	3762.12	86044.3	59990.3	38181.5	665	665	415	523	461	196
553	M	80	1.58	50	20.0288	0	1.68	78.8	1.51	0.89881	1.93	1.93	1.72	1.02	5.77	95.5	60.36	3.33	2850.89	84.49	2.96	-790.9	-962	-922	3.53	217.78	2.59	2.99	2.98	5116.13	3199.45	1421.52	24931	15547.5	6815.81	1019	536	212	601	254	99
554	M	56	1.7	58	20.0692	1	3.37	87.6	2.85	0.845697	6.94	6.23	3.41	1.35	9.12	98.1	53.88	5.09	4898.97	10.7913	0.220277	-800.681	-923	-887	5.02612	54.0949	4.10947	3.968	4.33567	723.082	1211.42	628.758	14348.5	11625.4	8287.04	64	99	51	17	25	5
555	M	68	1.64	92	34.2058	0	2.88	73.3	1.96	0.680556	4.59	3.12	1.51	0.53	7.67	97	57.96	5.73	5063.27	3.35	0.07	-838.3	-962	-890	5.23	54.54	2.39	4.42	4.37	9145.7	1721.73	3896.43	15791.3	29919	10245	36	93	77	6	13	10
556	F	68	1.52	44	19.0443	0	1.75	83.3	1.42	0.811429	3.83	3.72	2.18	0.51	4.59	72.3	60.03	3.39	1822.24	113.196	6.21189	-722.594	-1023	-895	4.44041	131.727	2.59973	3.17311	2.95573	3652.91	1943.42	517.703	4687.11	2354.69	924.219	688	274	102	386	96	39
557	F	62	1.6	48	18.75	0	1.83	72.2	1.6	0.874317	4.49	4.49	2.56	0.82	3.15	42.5	57.49	3.16	3032.55	19.42	0.64	-814.27	-945	-910	3.63	136.67	2.53	2.98	3.21	2862.71	2732.93	1339.13	17642.8	17030.3	7767.59	497	386	172	290	151	53
558	M	73	1.75	70	22.8571	0	2.78	74	2.13	0.766187	7.1	5.25	2.36	0.48	5.47	65	35.74	4.14	3642.81	650.73	17.86	-838.08	-1024	-958	3.47	189.74	2.24	2.55	2.7	5409.6	3342.54	1655.6	28704.9	16259.7	6983.09	1251	675	296	912	398	161
559	M	68	1.65	57	20.9366	0	2.43	74	1.85	0.761317	5.23	4.13	2.06	0.43	6.38	86	48.47	4.3	3514.99	27.45	0.78	-819.91	-947	-904	3.97	158.1	2.79	3.28	3.49	3703.92	3985.64	2641.24	13060.4	8878.45	5652.63	603	538	357	279	166	109
560	F	75	1.72	54	18.2531	0	2.29	76.4	1.83	0.799127	4.69	4.63	2.52	0.8	3.92	50.2	74.45	4.58	3466.01	1.14	0.03	-751.39	-903	-858	4.95	105.54	3	3.38	3.41	2632.01	2310.44	1657.15	3139.56	2212.88	1420.81	351	314	226	164	100	68
561	M	73	1.7	69	23.8754	0	3.5	110.7	3.12	0.891429	5.23	5.23	4.05	2.19	7.7	92.4	62.86	8.43	5657.42	130.773	2.31153	-826.771	-959	-921	4.3133	300.113	2.33908	2.96702	3.23417	8999.65	8878.15	5550.76	44416.6	30516.7	20839.3	1437	864	520	1003	344	175
562	F	68	1.58	59	25.6369	0	2.11	110	1.9	0.900474	3.86	3.72	3.07	1.26	6.14	96	47.31	4.09	2097.22	0.491593	0.02344	-667.652	-893	-830	5.47089	186.352	2.72939	3.09087	3.34641	6068.18	2999.02	882.123	4577.08	2152.48	416.867	915	390	98	477	173	40
563	M	69	1.72	64	21.6333	0	3.31	92.4	2.74	0.827795	4.2	3.71	2.74	1.63	6.23	71.9	57.7	5.67	5076.15	25.48	0.5	-818.72	-941	-901	3.14	304.5	2.65	2.96	3.29	8974	8430.09	5758.25	20423.9	20137.7	10388.3	1095	859	425	604	377	141
564	F	56	1.48	55	25.1096	0	1.77	78.8	1.4	0.79096	4.32	3.15	1.48	0.48	6.06	93.6	58.11	4.35	2826.92	7.45	0.26	-801.31	-933	-889	4.67	123.22	2.96	3.43	3.61	3981.36	3578.22	2568.68	6595.51	5247.11	3285.81	523	434	290	221	114	70
565	M	64	1.6	61	23.8281	1	2.64	79	2.07	0.784091	5.83	5.72	2.33	0.54	6.98	90.5	56.04	5.03	3753.96	27.68	0.74	-822.74	-946	-904	4.13	155.83	2.19	2.48	3.02	4500.7	3007.58	1759.12	27109.6	17552.6	8503.91	860	577	260	624	337	110
566	F	58	1.6	47	18.3594	0	2.16	87	2	0.925926	4.67	4.66	3.33	1.18	4.72	62	45.36	3.85	2089.71	0.6	0.03	-738.03	-905	-853	5.14	108.85	3.23	3.51	3.75	4115.28	2805.03	1831.21	2215.21	1433.94	659.44	444	340	182	164	75	43
567	M	79	1.7	88	30.4498	0	2.43	77	1.99	0.81893	4.56	4.56	3.17	0.74	6.97	89.7	63.27	4.55	3345.14	1.15	0.03	-756.18	-910	-860	5.03	169.94	2.37	2.85	3.3	6185.34	4672.1	2334.42	11978.5	6804.16	3065.37	921	465	212	627	202	74
568	F	77	1.62	50	19.052	0	1.7	75	1.37	0.805882	3.4	3.02	1.62	0.63	3.2	48	37.69	2.56	2068.76	0.44	0.02	-756.96	-906	-861	5.54	104.41	3.08	3.43	3.75	3492.08	2332.84	1193.9	2696.95	1791.16	605.93	474	328	146	197	105	40
569	F	50	1.55	62.5	26.0146	0	2.16	82.5	1.88	0.87037	5.86	5.78	3.31	0.92	4.56	60.7	37.99	3.05	2046.64	2.90875	0.142123	-724.356	-922	-855	5.33434	155.951	2.63511	3.28326	3.43632	4509.29	2936.52	984.724	6673.27	3356.22	1334.65	799	345	139	445	125	42
570	M	71	1.7	65	22.4913	0	2.95	77.2	2.11	0.715254	4.88	3.45	1.92	0.89	7.05	87.2	52.36	5.88	3868.56	90.09	2.33	-794.08	-965	-905	4.24	230.64	2.37	2.74	2.89	5215.83	4128.09	2290.97	26181.5	12862.9	6491.78	1186	713	366	772	367	193
571	M	69	1.65	53	19.4674	1	2.25	69.4	1.87	0.831111	4.4	4.27	2.15	0.82	6.91	87	50.58	4.29	3095.79	17.66	0.57	-772.51	-941	-886	5.52	229.14	2.58	2.81	2.76	7230.88	4933.88	2154.47	15561.2	8206.71	3522.52	1215	608	321	722	329	176
572	M	77	1.63	66	24.841	0	1.68	59.7	1.4	0.833333	3.6	2.97	1.38	0.5	5.31	74.5	50.99	3.7	1936	181.97	9.4	-727.08	-1024	-911	6.15	145.96	2.83	3.19	3.42	5038.15	3103.82	1095.88	8813.41	3206.57	1212.29	584	256	97	301	104	42
573	F	48	1.56	60	24.6548	0	2.04	64	1.54	0.754902	3.67	2.33	1.35	0.68	4.33	56	46.63	3.73	2700.08	14.31	0.53	-761.78	-941	-883	5.71	73.98	3.27	3.26	3.57	2079.75	2138.98	1274.16	6686.56	4432.02	2344.97	194	215	128	88	80	37
574	M	55	1.7	85	29.4118	1	3.88	101.8	3.34	0.860825	6.32	6.04	5.38	1.84	9.82	104.9	43.08	5.42	5281.63	0.260601	0.004934	-824.853	-923	-898	3.99763	50.9097	4.87528	4.69338	4.88162	1285.12	1749.32	1516.91	72.0081	3.42896	0	44	76	60	9	8	1
575	F	73	1.6	60	23.4375	0	1.15	52.6	1.02	0.886957	2.35	2.35	1.27	0.56	5.69	82.9	66.79	3.34	2303.31	6.29	0.27	-751.79	-930	-872	5.78	171.31	2.59	2.91	3.07	5948.8	2950.62	1174.97	8332.94	3663.94	1322.94	945	403	159	558	201	72
576	M	72	1.7	62	21.4533	0	2.37	67.7	2.03	0.85654	4.54	4.36	2.31	1.05	5.03	57.2	68.69	4.84	5684.84	937.7	16.49	-883.41	-983	-951	3.28	221.06	2.13	2.58	2.74	4964.49	4697.45	2952.11	73861.9	52567.1	32316.3	1215	779	425	943	442	201
577	F	69	1.6	59	23.0469	0	2.15	95.7	1.96	0.911628	4.4	4.31	3.35	1.2	6.7	94.8	63.04	6.15	3720.6	300.387	8.07362	-820.176	-1013	-928	3.88867	35.2017	3.74955	4.75735	4.02178	729.134	762.453	517.855	11465.6	9566.13	5751.94	57	56	38	17	10	11
578	F	77	1.58	56.5	22.6326	0	1.64	73.1	1.29	0.786585	3.23	3.23	1.6	0.42	7.19	110.4	37.69	4.16	2692.15	0.07	0	-720.07	-880	-821	6.22	144.5	3.08	3.63	3.69	4559.37	4216.22	1935.15	1622.07	719.08	332.96	693	464	211	288	116	59
579	M	60	1.7	68	23.5294	0	2.82	81.6	2.56	0.907801	4.57	4.25	3.97	1.63	8.13	90	44.6	5.08	4172.11	16.8352	0.403518	-797.173	-938	-895	4.22405	270.708	2.20124	2.66476	2.74526	5600.29	4547.23	2439.25	22661.3	14727.2	8703.36	1760	880	456	1282	478	238
580	M	82	1.63	51	19.1953	0	2.6	80.9	1.78	0.684615	3.76	3.43	1.38	0.5	5.74	84.5	51.55	5.15	4763.8	1568.62	32.93	-892.04	-1003	-969	3.3	158.19	2.03	2.29	2.57	2154.64	1644.67	1251.88	76582.5	53799.6	30255.2	842	639	374	651	425	196
581	M	42	1.78	83.5	26.354	0	3.9	86.1	3.52	0.902564	8.64	8.57	5.27	2.21	9.35	82.5	35.36	7	4636.4	0.301766	0.006509	-769.231	-907	-870	3.53377	348.655	2.45515	2.87905	2.77995	9323.03	8247.44	4635.95	25356.3	16424.1	9871.77	1916	969	558	1220	482	305
582	M	66	1.7	67.5	23.3564	0	2.69	86.6	2.47	0.918216	5.97	5.93	3.63	1.7	7.88	94.7	54.4	5.26	5014.61	1056.66	21.0716	-847.321	-1024	-966	3.69956	261.244	2.23887	2.94243	3.28244	7947.59	6725.06	4144.18	42250	28780.3	16758.1	1419	778	419	1023	313	144
583	F	61	1.57	58	23.5304	0	2.6	111.5	2.34	0.9	5.61	5.61	5.05	1.94	7.45	104	43.76	2.5	2348.4	0.543005	0.023122	-690.822	-894	-833	4.42307	220.719	2.64259	2.73829	2.84227	5978.06	3109.14	1369.41	5127.48	2811.2	1051.11	1148	566	221	650	295	121
584	M	58	1.64	62	23.0518	0	3.18	103.6	3.01	0.946541	6.3	6.3	5.44	1.7	8.87	105.3	56.1	5.93	5081.21	2.34478	0.046146	-784.525	-915	-875	4.10907	52.9267	4.4537	4.41109	4.2913	1078.29	1309.65	1129.75	8006.09	6843.37	4902.28	56	79	64	13	12	8
585	M	60	1.82	86	25.963	0	3.82	78.5	2.89	0.756545	6.21	5.89	4.22	0.69	7.17	68.7	44.26	5.11	4504.07	524.1	11.64	-822.43	-1024	-937	2.88	252.33	2.37	2.93	2.99	8264.61	6424.69	4057.4	19358.3	13577.2	7656.3	1393	721	433	904	311	181
586	F	43	1.6	49	19.1406	0	2.32	84.7	2.28	0.982759	4.43	4.43	3.97	2.2	6.93	83.1	57.05	4.54	3132.18	20.0455	0.639984	-782.015	-942	-883	4.83827	170.275	2.16367	2.89188	3.36754	4342.33	3524.67	1685.74	21883.7	12819.3	6930.65	1059	453	206	768	195	56
587	F	79	1.5	55	24.4444	0	1.56	94.2	1.29	0.826923	3.44	3.33	1.67	0.5	6.13	107.4	62.32	3.79	2154.56	0.747635	0.0347	-726.659	-904	-847	6.62785	131.23	2.39296	2.90887	3.27054	3664.96	2889.15	1208.64	12168.2	6431.68	2629.36	804	401	154	540	186	54
588	M	67	1.75	72	23.5102	0	2.73	62.7	1.9	0.695971	5.2	3.66	1.52	0.33	5.92	67.3	64.77	4.98	4911.39	66.04	1.34	-830.3	-952	-926	4.65	35.73	3.8	3.53	4.21	672.68	1054.22	3755.49	32812.5	27248.2	15570.4	465	83	56	215	22	8
589	M	73	1.67	70	25.0995	1	2.74	69.9	1.84	0.671533	4.49	2.61	1.32	0.45	5.6	71.5	52.74	5.36	6159.4	297.82	4.84	-863.84	-971	-931	4.28	234.04	2.24	2.65	3	3956.25	5643.34	3442.46	51335.6	47258.5	27223.6	630	811	430	450	444	180
590	F	76	1.6	52	20.3125	0	1.63	77.8	1.44	0.883436	2.94	2.94	2.06	0.88	4.25	63.7	60.36	3.29	3380.16	102.54	3.03	-822.48	-968	-917	3.69	223.1	2.27	2.47	2.7	5627.36	3486.23	1938.86	37971.7	18813.2	10844.8	1339	733	337	936	444	179
591	M	80	1.7	62	21.4533	0	1.69	24.4	0.6	0.35503	1.43	0.48	0.3	0.24	1.61	21.6	70.73	4.22	6302.73	993.27	15.76	-859.66	-1000	-951	5.66	211.55	1.98	2.42	2.76	3725.72	4433.65	3439.14	73145.4	54734.6	32631.7	1020	842	516	832	549	256
592	M	56	1.72	61	20.6193	1	3.92	73	2.46	0.627551	4.59	3.09	1.82	0.84	6.1	64	48.28	6.78	5481.46	739.76	13.5	-817.84	-1024	-943	4.7	297.28	2.27	2.57	2.76	6842.05	5864.27	3758.26	29183.1	17759	9239.82	1640	1084	579	1164	626	300
593	M	61	1.68	69	24.4473	1	1.89	46	1.38	0.730159	3.29	2.39	1.18	0.46	3.28	37	56.91	4.34	3343.15	33.87	1.01	-754.15	-950	-874	5.88	268.32	2.57	2.98	3.11	7182.61	4383.89	1980.11	15304.3	8840.09	3810.27	1316	693	272	771	334	127
594	M	63	1.7	61	21.1073	1	3.8	117	3.77	0.992105	8.11	8.1	6.29	2.15	9.41	101.5	56.1	7.79	5723.01	19.1275	0.33422	-793.061	-937	-893	3.56512	64.9617	4.73315	4.45506	4.58599	1131.64	1741.5	1619.17	9739.52	8404.18	4472.54	45	83	68	8	7	6
595	M	76	1.7	45	15.5709	0	1.77	74.5	1.54	0.870056	2.13	2.06	1.67	1.12	5.29	82.4	57.72	4.85	4489.58	20.18	0.45	-801.78	-940	-894	3.6	179.73	2.91	3.41	3.81	4606.08	4536.9	3537.55	11041.4	8290.23	5494.34	560	514	349	252	159	72
596	M	66	1.65	60	22.0386	1	2.87	78.5	2.11	0.735192	5.25	4.01	1.99	0.71	4.41	55.5	53.32	5.47	6500.97	908.86	13.98	-858.79	-995	-948	3.36	341.91	2.04	2.51	2.61	6156.42	5167.06	3573.05	72167.4	55023.9	34838.2	2196	1253	737	1705	725	405
597	M	70	1.74	65	21.4692	0	3.78	83	2.5	0.661376	4.73	3.83	1.8	1.18	4.53	51	56.65	5.83	5567.81	954.69	17.15	-839.14	-1063	-956	3.89	222.95	2.3	3.05	3.38	5462.83	6439.57	4564.79	42704.4	25673.2	14897.1	872	678	423	596	281	123
598	M	60	1.65	63	23.1405	0	2.62	60.6	1.79	0.683206	5	3.26	1.29	0.51	7.3	85.5	43.99	4.54	3577.69	89.43	2.5	-827.37	-960	-922	5.08	265.44	2.35	2.67	2.83	6882.41	5444.96	2793.93	34530.1	21655.2	11454.6	1635	910	459	1087	503	234
599	F	62	1.63	55	20.7008	0	1.51	63.2	1.48	0.980132	4.68	4.5	2.68	1.2	5.18	67.5	54.02	4.34	1786.26	0.16	0.01	-732.63	-918	-862	5.39	95.13	3.17	3.34	3.76	2501.95	2077.76	1098.26	1534.11	933.2	309.77	393	315	134	152	102	35
600	M	58	1.75	100	32.6531	1	2.78	71.9	2.45	0.881295	5.16	4.93	3.65	1.4	10.83	111.4	54.4	5.24	3055.3	0.22	0.01	-730.03	-890	-835	6.13	265.62	2.82	3.16	3.12	10694.6	5939.96	2661.69	7161.99	3282.2	1187.34	1295	604	261	654	268	133
601	M	77	1.6	60	23.4375	0	1.95	70.6	1.56	0.8	4.3	3.98	1.86	0.51	5.32	78.2	58.11	3.6	3564.7	13.58	0.38	-816.4	-940	-901	4.1	137.14	3.07	3.5	3.73	5653.38	5323.43	3411	13096.1	8304.87	4353.16	517	468	283	196	123	57
602	M	70	1.72	57	19.2672	1	2.3	75.2	2.14	0.930435	4.99	4.95	3.24	1.25	6.47	77.4	40.28	4.85	3834.18	19.37	0.51	-793	-941	-895	3.88	173.94	2.96	3.21	3.47	3909.21	3371.48	1964.99	10787.9	6797.1	4174.8	708	564	336	315	221	116
603	M	75	1.7	77	23.6713	1	3.63	109	2.94	0.809917	6.6	6.54	3.88	1.05	6.09	76	37.27	5.38	3233.49	11.4358	0.353666	-732.065	-933	-874	4.75757	252.96	2.50936	2.88932	2.79995	8335.96	5985.83	2791.04	17029.7	10969.1	6019.66	1322	651	351	816	332	192
604	M	54	1.58	66	26.4381	0	3.19	96.3	3.08	0.965517	8.79	7.35	3.82	1.52	6.36	69.6	43.78	6.29	4706.37	226.103	4.80418	-848.061	-971	-931	3.20772	258.252	2.17457	2.69615	2.91005	6962.32	5778.28	3503.35	46360.1	31428.6	20025.7	1570	877	465	1167	460	204
605	M	65	1.7	55	19.0311	1	2.82	77	2.31	0.819149	5.58	5.09	2.6	1.01	7.57	87	48.35	5.32	4592.32	35.51	0.77	-802.06	-946	-891	4.53	293.25	2.26	2.62	2.8	5744.96	4449.41	2566.26	22267.8	13086.5	6719.65	1757	993	501	1208	546	264
606	M	60	1.65	46	16.8962	0	3.79	112.3	3.27	0.862797	5.77	5.77	5.35	1.88	6.97	82.7	53.19	5.59	2497.38	1.0536	0.042188	-699.09	-901	-848	4.73278	167.418	3.32605	3.63488	3.98962	6633.11	4359.04	1334.98	1837.26	984.087	322.311	723	378	126	276	121	32
607	F	85	1.58	62.5	25.0361	0	1.22	61.3	0.9	0.737705	1.81	1.78	0.85	0.31	2.36	39.9	54.06	2.47	2370	96.18	4.06	-723.52	-1023	-873	6.03	124.74	3.02	3.39	3.43	4871.29	2653.57	1059.44	4243.49	2227.56	494.21	518	243	96	214	72	32
608	M	86	1.7	80	27.6817	0	1.79	44.6	1.02	0.569832	1.92	1.22	0.65	0.23	3.44	48.8	61.03	3.55	4578.6	235.81	5.15	-821.23	-975	-922	5.98	254.97	2.32	2.72	2.77	7914.89	6111.53	3094.12	46912.2	22571.6	9570.92	1385	781	416	949	426	233
609	M	63	1.82	82	24.7555	0	4.44	101.8	3.66	0.824324	8.79	8.65	5.18	1.39	9.4	91.9	47.28	6.65	5094.01	117.169	2.30014	-819.42	-963	-915	3.64731	278.319	1.99374	2.71075	2.80898	6946.11	6200.83	3731.67	46598.2	31791.2	19264.9	1967	922	537	1608	533	236
610	M	68	1.7	75	25.9516	0	2.7	77.7	2.26	0.837037	4.37	4.36	3.05	1.06	6.22	73.1	52.03	4.73	2880.95	1.08	0.04	-734.13	-903	-852	4.8	238.65	2.73	2.92	2.96	9445.82	5804.72	2648.6	8619.81	4903.68	2300	1170	588	253	594	281	124
611	F	75	1.58	76	30.4438	0	1.35	60	1.1	0.814815	2.76	2.76	2.34	0.38	2.65	40	53.67	2.97	2162.08	0.26	0.01	-698.08	-890	-826	5.56	122.99	3.22	3.81	4.25	6374.34	4902.69	1722.14	1859.61	892.72	329.24	530	317	124	178	72	20
612	M	73	1.7	70	24.2215	0	1.96	68.8	1.9	0.969388	4.22	3.47	2.86	1.18	7.78	95.3	47.28	5.97	3987.17	204.01	5.12	-834.84	-973	-928	4.2	210.52	2.23	2.57	2.78	5440.8	4019.35	2065.55	38704.8	23580.2	11369.5	1272	740	348	907	434	175
613	M	59	1.69	65	22.7583	1	3.19	84	2.61	0.818182	5.47	5.22	3.61	1.06	6.53	73	38.2	4.69	4136.6	100.98	2.44	-843.58	-961	-921	3.54	287.34	2.39	2.88	2.83	7038.82	5473.79	3155.59	37519.9	23144.5	13434.6	1674	831	465	1109	378	235
614	M	85	1.55	49	20.3954	0	1.52	54	1.2	0.789474	3.41	3.35	1.78	0.37	3.51	51	48.35	3.36	2581.86	1.54	0.06	-735.48	-913	-852	5.15	140.16	3.12	3.58	3.56	4049.06	3293.79	1775.5	2781.89	1120.91	379.35	568	415	213	219	122	68
615	M	64	1.73	70	23.3887	0	3.14	72.4	2.28	0.726115	5.75	4.16	1.92	0.64	7.64	84	48.83	6.31	4118.27	589.37	14.31	-823.59	-1024	-947	3.9	233.5	2.29	2.63	2.74	5826.67	4300.45	2224.56	23665	14965.3	7324.47	1399	740	394	957	405	221
616	M	72	1.75	75	24.4898	0	3	77.3	2.34	0.78	7.12	5.31	2.68	0.72	5.31	59.9	51.09	4.75	4085.63	41	1	-793.3	-950	-895	4.21	262.86	2.39	2.59	2.72	7364.15	5301.77	2905.78	23465.5	15662.4	7419.81	1499	889	417	975	525	242
617	M	66	1.72	76	25.6896	0	3.58	70.2	2.22	0.620112	4.4	3.05	1.53	0.52	9.93	108.6	49.59	6.28	5517.99	188.89	3.42	-846.66	-963	-927	4.08	269.68	2.12	2.51	2.73	6842.52	5490.62	3566	50351.6	33971.7	18957.7	1716	1077	561	1300	655	295
618	F	57	1.61	50	19.2894	0	2.65	98.8	2.42	0.913208	6.59	6.11	3.69	1.28	7.56	96.2	43.78	4.83	4569.64	757.438	16.5755	-855.885	-1024	-953	3.22025	224.261	2.07176	2.7311	2.91919	5235.49	4426.47	2937.9	28332.4	18198.7	11078.8	1479	777	419	1129	396	180
619	M	80	1.7	74.6	25.8131	0	2.08	48.9	1.25	0.600962	2.71	1.8	0.75	0.27	7.15	92.7	67.08	5.83	4657.55	71.09	1.53	-829.09	-954	-914	5.86	172.77	3.05	3.47	3.81	5211.67	6675.53	5146.1	19441.8	12430.1	7913.11	438	524	377	192	116	79
620	M	68	1.68	72.5	25.6874	0	2.46	68.9	2.06	0.837398	7.69	6.04	2.56	0.62	7.06	80.9	49.67	4.62	4086.93	7.17	0.18	-810.21	-934	-897	3.72	194.69	3.01	3.57	3.83	6194.71	5944.07	3702.5	12444.3	9018.65	6413.69	735	565	377	314	129	87
621	M	75	1.65	51	18.7328	1	1.93	45	1.07	0.554404	2.29	1.23	0.59	0.23	3.47	48	54.82	3.49	4569.69	520.99	11.4	-810.92	-1045	-936	4.32	144.35	2.25	2.51	2.69	2121.1	2864.36	1943.47	17658.7	16530.2	9060.15	486	569	318	374	343	166
622	M	64	1.7	67.5	23.3564	1	3.01	77	2.51	0.833887	5.17	5.15	2.89	1.13	5.41	58	52.03	5.01	3854.66	1.36	0.04	-767.27	-912	-861	6.19	256.73	2.33	2.72	2.81	6845.98	4905.08	2441.43	12898.7	8007.06	3712	1496	785	366	993	413	196
623	F	72	1.55	50	20.8117	0	1.08	42.8	0.84	0.777778	2.57	2.54	1.15	0.21	4.29	62	64.16	4.23	1790.7	6.18	0.34	-779.46	-935	-888	4.15	112.6	2.46	2.65	2.49	2868.82	1587.18	530.58	7849.98	3579.8	1462.56	620	265	122	395	142	73
624	F	74	1.58	50	20.0288	0	1.4	67	1.15	0.821429	2.18	1.56	0.87	0.39	3.53	55	57.82	3.74	2266.93	0.86	0.04	-739.64	-904	-846	5.05	195.65	2.42	2.71	2.77	4647.42	2822.91	1215.7	4805.85	1816.94	725.4	1103	521	185	693	296	98
625	F	89	1.5	55	24.4444	0	1.19	86.4	0.97	0.815126	1.91	1.91	1.5	0.34	3.39	65	63.88	7.47	1808.86	0.597956	0.033057	-694.089	-894	-828	6.35054	122.015	2.6292	3.03052	3.41072	4091.35	2374.57	1152.32	3725.6	1647.12	597.956	699	313	101	400	137	37
626	M	85	1.8	66	20.3704	0	2.19	78	2.13	0.972603	3.28	2.94	2.17	1.79	5.48	67	59.93	5.15	3010.3	9.27	0.31	-784.16	-933	-891	4.37	152.3	2.88	3.06	3.26	5762.89	4202.29	1757.15	11563.3	9163.22	4194.06	563	370	157	274	149	57
627	M	86	1.68	61	21.6128	0	2.18	55	1.31	0.600917	2.97	2.66	0.74	0.15	3.52	48.2	55.99	4.5	3235.47	31.4	0.97	-769.52	-949	-887	5.57	151.06	3.25	3.55	3.88	4543.67	3635.58	1916.14	12573.4	6876.08	1886.9	563	451	190	194	145	43
628	F	75	1.68	56	19.8413	0	1.93	78.1	1.39	0.720207	2.88	2.52	1.24	0.3	4.17	63.9	47.56	3.05	2493.97	3.54	0.14	-745.24	-925	-868	5.65	198.13	2.52	2.99	2.88	6008.48	3018.51	1202.62	8848.81	3826.24	1655.76	1026	446	178	607	209	82
629	F	66	1.6	52	20.3125	0	1.93	72.6	1.51	0.782383	3.73	3.64	1.59	0.43	6.12	85.8	58.96	3.73	2236.39	1.24	0.06	-762.9	-910	-865	4.89	155.79	3.07	3.69	3.86	6215.19	4391.66	1459.36	5694.03	4516.08	1538.9	542	288	97	212	79	23
630	F	69	1.6	76	29.6875	0	2.02	67.9	1.6	0.792079	4.02	4.02	1.65	0.63	5.87	76.1	59.69	4.41	2949.36	2.35	0.08	-762.88	-919	-869	4.83	187.65	2.84	3.08	3.31	5446.69	3821.66	1794.09	8445.94	5830.73	2593	712	401	170	335	172	68
631	F	85	1.55	50	20.8117	0	1.17	68.5	0.95	0.811966	2.49	2.48	1.25	0.36	3.62	63.1	74.62	2.99	2602.51	122.23	4.7	-748.31	-1023	-889	5	155.57	2.64	3.06	3.15	3625.89	2205.03	842.75	4266.69	1669.96	631.95	739	347	139	391	144	61
632	M	74	1.73	70	23.3887	0	3.17	69	1.99	0.62776	4.36	3.89	1.25	0.49	4.52	53.2	50.42	6.24	5234.48	544.4	10.4	-858.05	-981	-917	5.51	62.95	4.46	2.6	4.23	955.53	1356.13	3345.39	35904.6	41456.3	25595	60	875	76	1021	467	14
633	M	60	1.74	55	18.1662	0	3.8	97.9	3.16	0.831579	5.29	5.17	4.2	1.5	8.95	96.7	53.19	4.04	4063.45	2.85501	0.070261	-739.537	-893	-839	4.57607	64.0436	4.49059	3.98425	4.41377	1403.02	1134.7	1047.65	103.944	108.564	23.0988	70	85	65	16	16	16
634	F	83	1.58	59	23.634	0	1.51	70.9	1.08	0.715232	2.82	2.62	0.93	0.23	3.54	58.9	52.26	3.09	2162.47	3.41	0.16	-753.66	-925	-871	6.03	110.21	2.5	2.91	3.32	3745.28	1996.27	602.08	8229.04	3019.21	718.84	579	276	75	347	112	30
635	M	82	1.73	72	24.0569	0	2.84	91.7	2.41	0.848592	5.11	5.07	3.73	1.04	5.92	74.9	50.87	5.42	6036.51	18.7945	0.311347	-850.627	-943	-921	4.3373	48.2578	4.64553	4.48901	4.43666	1075.82	1283.87	1145.97	1232.52	817.674	291.597	47	75	65	8	6	8
636	M	56	1.69	63	22.0581	0	4.15	108.6	3.53	0.850602	11.63	10.87	6.24	1.41	6.6	71	31.98	5.17	5640.11	185.23	3.28415	-855.855	-962	-930	2.71661	240.879	2.48356	3.05045	3.34569	8233.7	8268.62	5804.84	56265.5	40267.2	23457.4	911	711	422	579	283	127
637	F	53	1.65	68	24.977	0	2.1	74.3	1.93	0.919048	5.79	5.59	3.69	1.58	6.87	84.1	51.73	3.94	2673.26	0.45	0.02	-747.12	-897	-848	5.03	173.55	2.53	2.89	2.84	4504.27	2525.44	1296.34	7925.44	3907.4	1714.51	969	456	201	603	209	101
638	M	67	1.7	49	16.955	1	1.83	32	0.95	0.519126	2.58	1.09	0.47	0.17	3.59	41.6	67.12	4.57	6556.91	845.58	12.9	-868.73	-990	-946	4.3	280.24	2.28	2.82	3.09	5811.13	5369.64	3528.86	72700.9	53029.4	32679.5	1228	833	478	859	393	179
639	M	70	1.78	74.6	23.545	1	2.82	71.8	2.29	0.812057	6.39	5.64	2.51	0.8	9.8	105.8	54.35	6.42	6572.76	120.77	1.84	-841.81	-956	-920	3.49	214.05	3.05	3.32	3.59	6067.02	8074.96	6730.5	32561.6	21924.9	15465.6	492	598	489	202	156	98
640	M	64	1.67	75	26.8923	0	1.75	48	1.39	0.794286	3.85	3.85	1.65	0.37	6.22	74	57.43	3.75	1761.69	0	0	-625.15	-825	-755	5.87	186.08	2.76	3.18	3.17	6013.78	1976.04	578.28	1257.99	290.07	54.61	758	248	59	416	113	27
641	M	92	1.73	57	19.0451	1	2.69	80	1.78	0.66171	4.44	3.28	1.34	0.49	2.13	30	58.58	4.86	5992.18	817.92	13.65	-852.43	-997	-947	4.02	180.18	2.92	3.24	3.4	3735.23	4026.46	3869.66	50269.3	43957.7	35221	426	494	425	203	184	114
642	F	60	1.56	55.5	0.410914	0	1.85	78.8	1.68	0.908108	4.61	4.61	3.22	0.72	5.62	77.8	48.25	3.49	2021.41	8.04	0.4	-725.22	-929	-849	4.78	110.22	2.44	3.08	3.6	4584	2425.61	902.29	4421.33	1838.93	511.67	636	261	65	391	96	17
643	M	92	1.73	86.6	28.9351	1	1.41	55	1.29	0.914894	3.27	2.94	2.01	0.81	3.74	52	67.08	4.37	4234.63	2.73	0.06	-788.59	-923	-883	4.42	181.55	2.98	3.59	3.83	5386.02	7311.04	4603.09	7755.95	5910.8	4355.06	584	550	376	241	120	81
644	M	81	1.6	48	18.75	1	2.34	97.3	2.04	0.871795	3.54	3.54	2.78	0.97	3.33	51	50.58	4.75	4720.72	571.974	12.1162	-794.197	-1008	-943	3.55322	421.056	2.46458	2.46559	2.64914	7702.71	4710.78	2465.46	55564.8	34851	21422.3	1860	1048	540	1188	647	306
645	M	71	1.59	65	25.711	0	3.36	95	2.21	0.657738	6.45	3.18	1.51	0.49	3.59	51	48.78	5.5	4743.15	212.31	4.48	-824.7	-988	-913	3.82	200.95	2.75	3.22	3.5	4083.89	4315.6	4047.75	25634.3	18198.7	12701	657	568	476	327	193	133
646	M	75	1.74	78	25.763	1	2.66	78	2.29	0.860902	7.25	6.09	3.62	0.88	4.75	55.2	39.96	4.35	4642.91	104.36	2.25	-833.08	-958	-920	3.39	102.19	2.76	3.12	3.13	2227.3	2631.45	1961.18	25174.6	19384.4	14080.1	293	346	291	160	128	94
647	F	71	1.67	70	25.0995	0	1.43	58.8	1.33	0.93007	2.99	2.99	1.59	1.08	4.83	64.3	58.61	3.78	2841.11	0.74	0.03	-749.31	-901	-849	5.12	100.77	3	3.47	3.9	2879.33	2474.01	1603.52	1626.9	943.46	449.61	352	293	173	157	89	33
648	M	62	1.65	80	29.3848	0	3.16	105	3	0.949367	7.77	7.74	6.02	2.59	8.1	97	42.63	5.09	3297.87	149.025	4.51883	-737.529	-1019	-889	4.67542	283.09	2.69015	3.08259	2.92347	10126.5	6742.57	3216.43	6136.56	3762.47	1745.25	1377	679	336	751	297	185
649	F	63	1.55	55	22.8928	0	1.76	69	1.4	0.795455	3.49	2.99	1.23	0.25	5.78	83	50.55	3.48	2622.09	0.99	0.04	-738.58	-903	-847	5.24	185.52	2.57	3.04	3.36	5016.53	2759.51	977.31	6673.29	2944.93	948.25	1018	443	132	584	185	41
650	F	52	1.62	62	23.6244	0	2.14	77	1.97	0.920561	6.88	6.88	3.82	1.03	6.43	79	47.67	3.96	1798.85	0.56	0.03	-684.89	-894	-830	5.26	170.46	2.64	2.94	2.97	4142.6	1752.62	353.8	2999.34	1031.83	214.24	891	335	62	519	173	31
651	M	77	1.75	52	16.9796	0	1.37	33	0.96	0.70073	2.29	1.31	0.63	0.28	1.11	13	63.92	3.67	3559.13	48.77	1.37	-768.55	-958	-893	5.05	265.18	2.72	3	3.22	6628.1	5002.29	3106.51	22537	14526.4	7500.65	941	675	354	538	325	153
652	M	79	1.72	43	14.5349	1	1.4	33.4	0.9	0.642857	2.07	1.4	0.55	0.19	1.4	17.4	65.86	4.36	4705.73	772.96	16.43	-857.94	-995	-952	4.67	249.23	2.24	2.66	2.81	4911.94	4086.13	2606.35	71976.3	43332.8	26592.1	1251	804	462	872	430	235
653	F	63	1.6	65	25.3906	0	1.93	90	1.72	0.891192	4.63	4.61	3.13	0.88	8.89	131	58.64	4.48	1987.68	0.166905	0.008397	-641.021	-870	-794	6.17854	184.925	3.00283	3.22093	3.59577	7200.24	3727.88	1434.46	1911.42	729.315	233.006	790	355	113	345	128	43
654	F	65	1.6	61	23.8281	0	1.88	72	1.58	0.840426	3.56	3.5	1.73	0.83	1.52	20	43.96	4.29	2838.67	0.17	0.01	-735.05	-884	-835	5.78	156.48	3.19	3.68	3.99	6385.66	5366.49	3192.12	1934.24	1333.52	792.49	585	423	244	200	102	53
655	M	70	1.72	84	28.3937	0	2.78	76.5	2.25	0.809353	6.74	6.74	3.33	0.67	8	93.1	54.02	4.9	3022.26	0.23	0.01	-680.61	-870	-804	5.04	104.09	2.22	2.68	3	3859.59	2318.71	1513.21	3388.92	1602	823.73	632	302	163	459	154	64
656	M	72	1.6	45	17.5781	0	3.45	124.4	2.94	0.852174	6.02	6.02	4.33	1.36	7.26	101.8	53.3	6.31	4423.34	8.97269	0.202849	-796.45	-935	-893	4.10609	62.8838	4.00337	3.89214	4.14126	997.64	868.136	1038.13	12421.4	9226.29	6858.11	70	98	97	20	26	18
657	M	67	1.76	81	26.1493	0	2.47	71.4	2.34	0.947368	5.73	5.66	5.16	1.77	8.28	87.6	47.15	5.35	3949.7	3.6	0.09	-743.22	-899	-847	5.06	218.74	3.12	3.51	3.92	7286.74	7404.74	5252.1	2146.79	1348.59	701.07	736	658	395	283	180	81
658	M	73	1.76	70	22.5981	0	2.64	79	2.47	0.935606	3.31	3.29	3.24	2.34	6.25	68	60.58	5.23	5024.96	100.32	2	-806.34	-961	-910	3.06	295.97	2.34	2.76	2.99	7734.39	5563.6	3255.75	37821.7	19970.3	10939.8	1561	839	469	1015	388	205
